# Supplementary material
Source: Research Square preprint supplement (doi:10.21203/rs.3.rs-9286338/v1)
Supplement: Supplementary file 1 [file 0afc18d40e1bea0b566b7016.pdf]

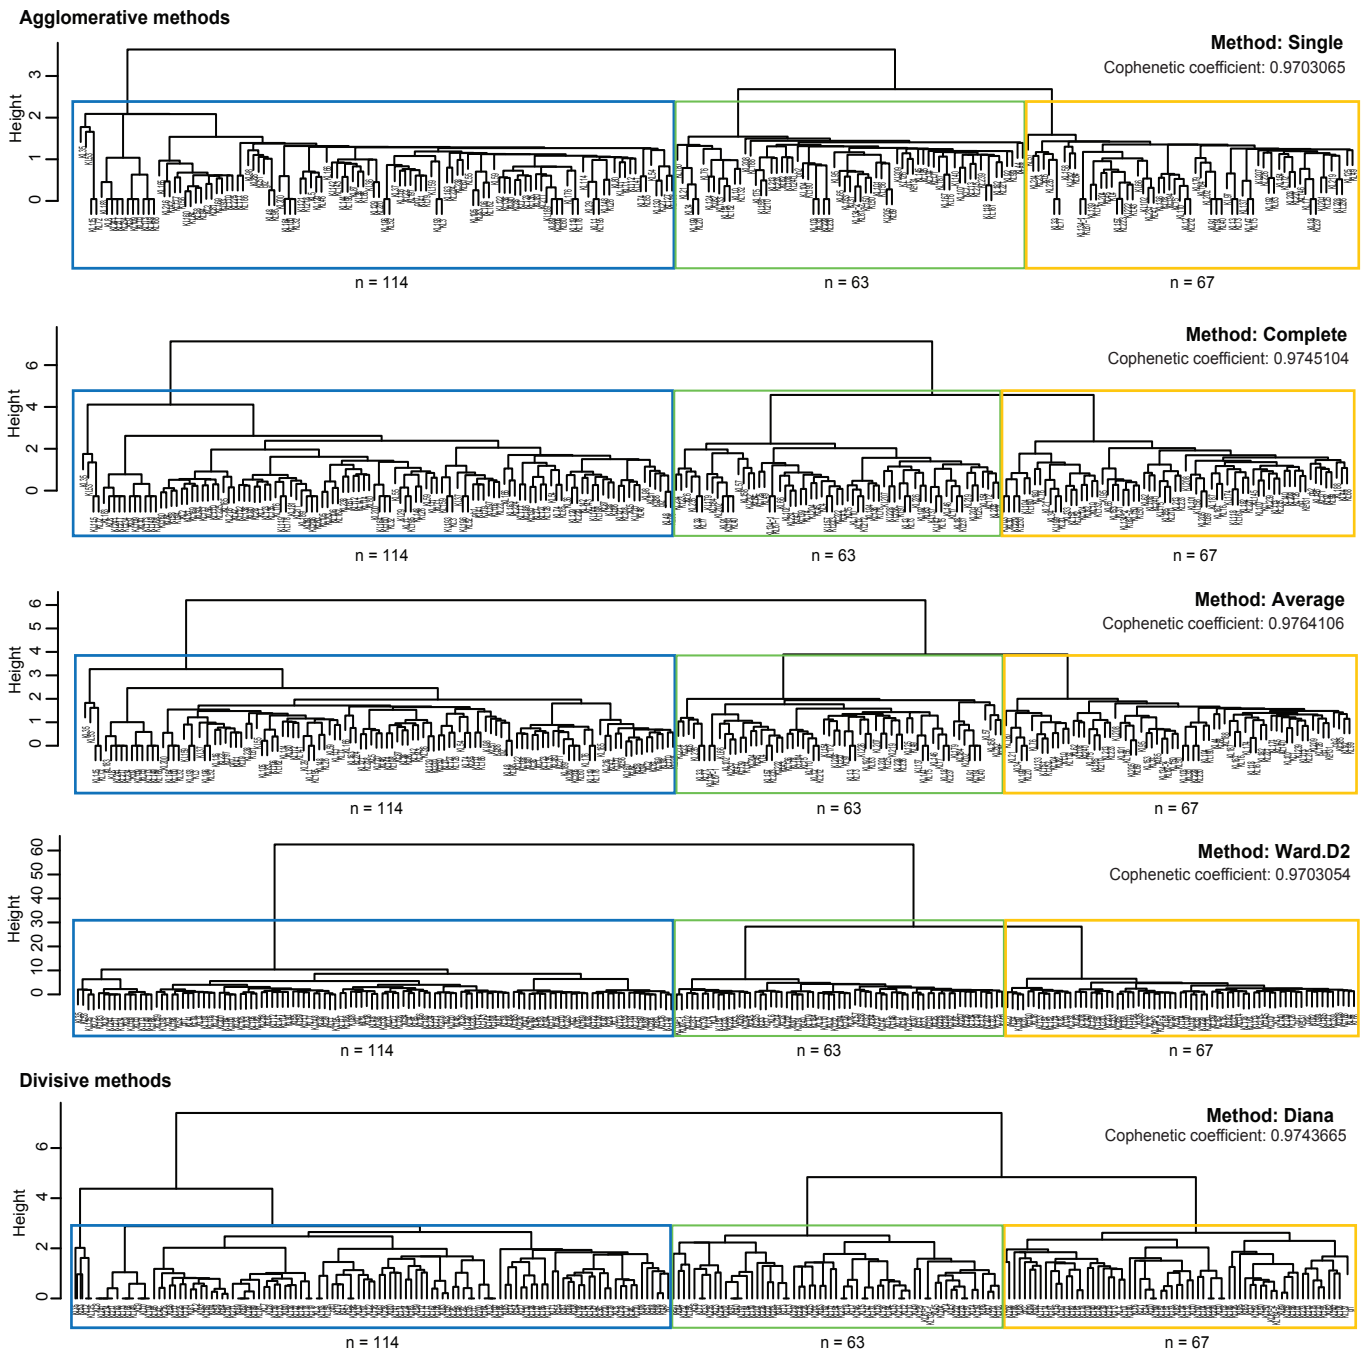

**Extended Data Figure 1. Comparison of hierarchal clustering methods using tertiary structures of *A. baumannii* Wzy polymerases.** Comparison of dendrogram visualisations and cophenetic coefficient calculations of agglomerative (single, average, complete, ward.D2) and divisive (DIANA) clustering methods. Colour boxes indicate subgroups when dendrogram is cut into three.

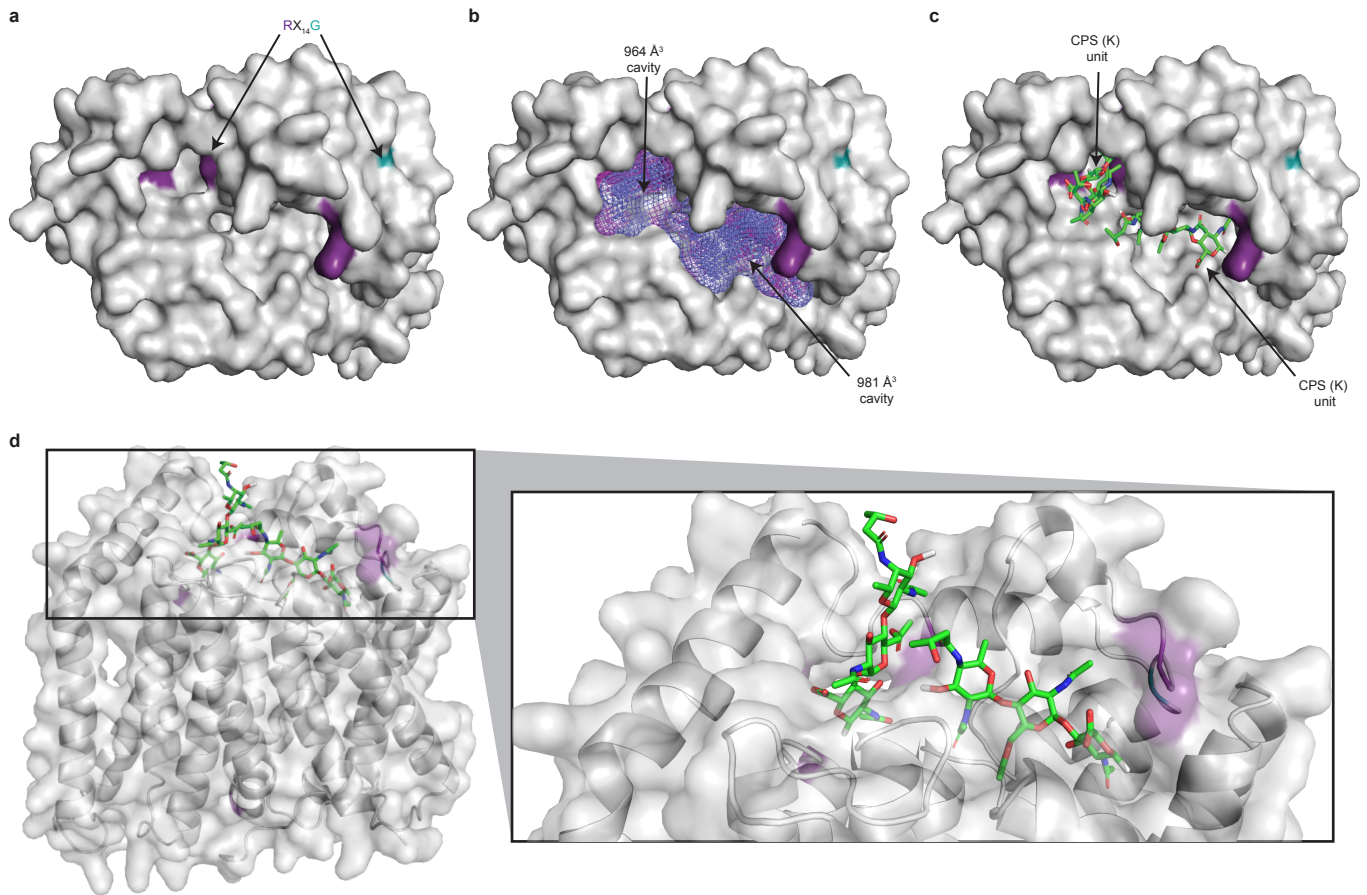

**Extended Data Figure 2. Wzy modelled in complex with glycan substrates. (a)** Top view indicating relevant arginine (R; purple) and glycine (G; green) residues. RX<sub>14</sub>G motif in PL2 indicated. **(b)** CavitOmix cavity predictions. **(c)** Structure modelled and complexed with two K1 glycans, which were each placed in a predicted periplasmic cavity. **(d)** Lateral view of Wzy (transparent surface) complexed with K1 glycan, showing zoomed-in region of K1 glycan placement in cavities.

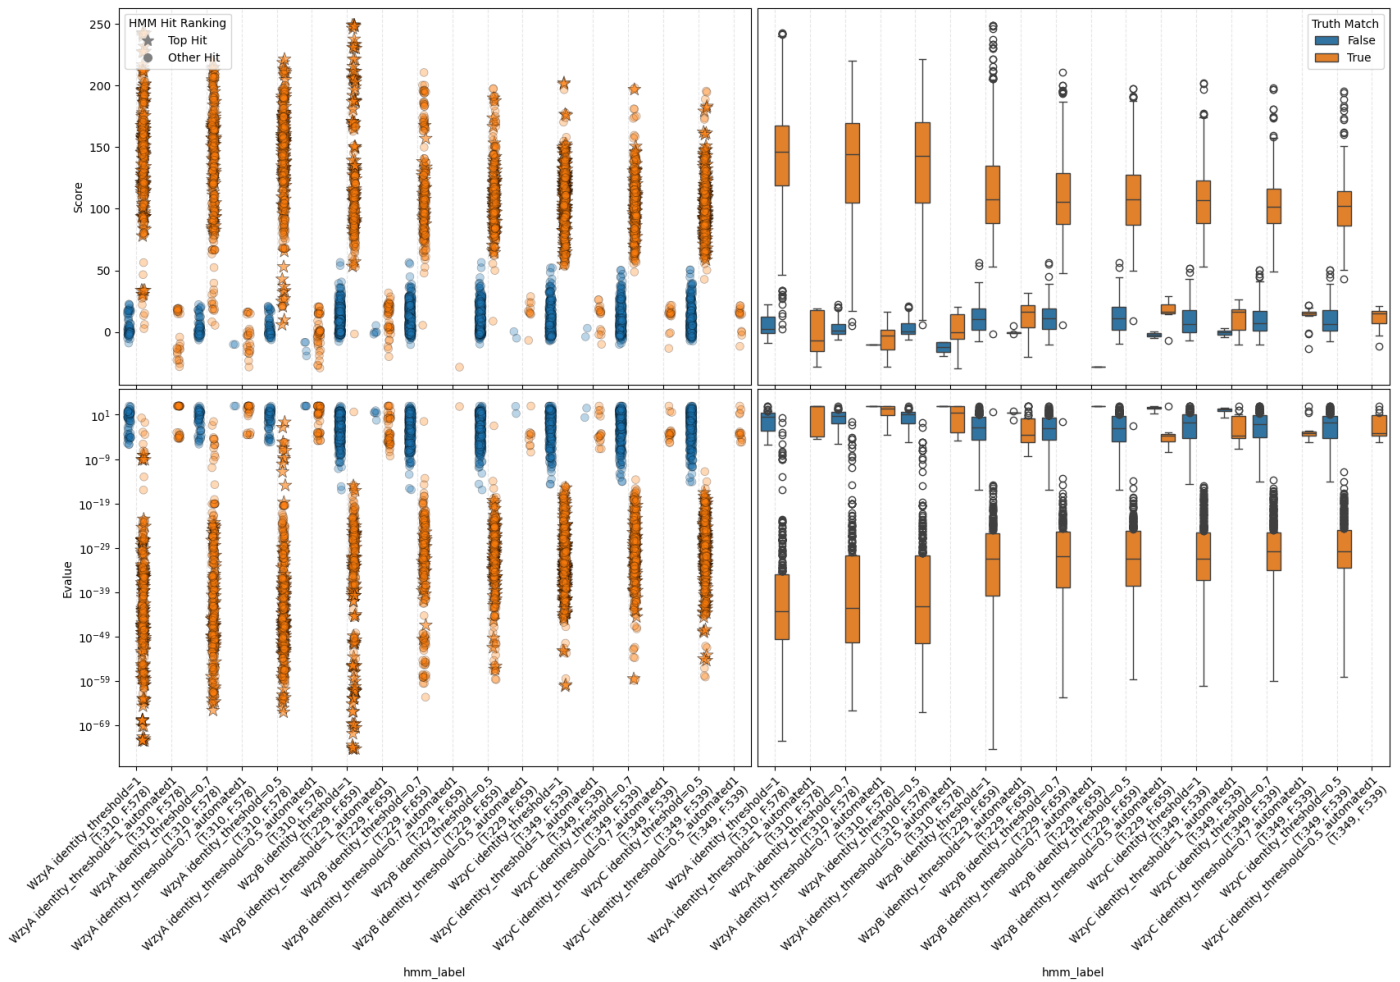

**Extended Data Figure 3. Bit score (top row) and e-value (bottom row) distributions of custom HMMs to WzyA, WzyB and WzyC ground truths.** HMM profiles tested are those built from MSAs trimmed row-wise at varying identity thresholds of 0.5, 0.75 or 1 (i.e. no trimming), or those followed by trimming column-wise using the “automated1” heuristic algorithm. Colours indicate whether they match the ground truth (orange vs blue) and shapes indicate if matches were the top hit across all HMMs tested (star vs circle). Distributions are visualised as data points (left) and boxplots (right).

Pairwise TM-Score Distributions Between Wzy Clusters

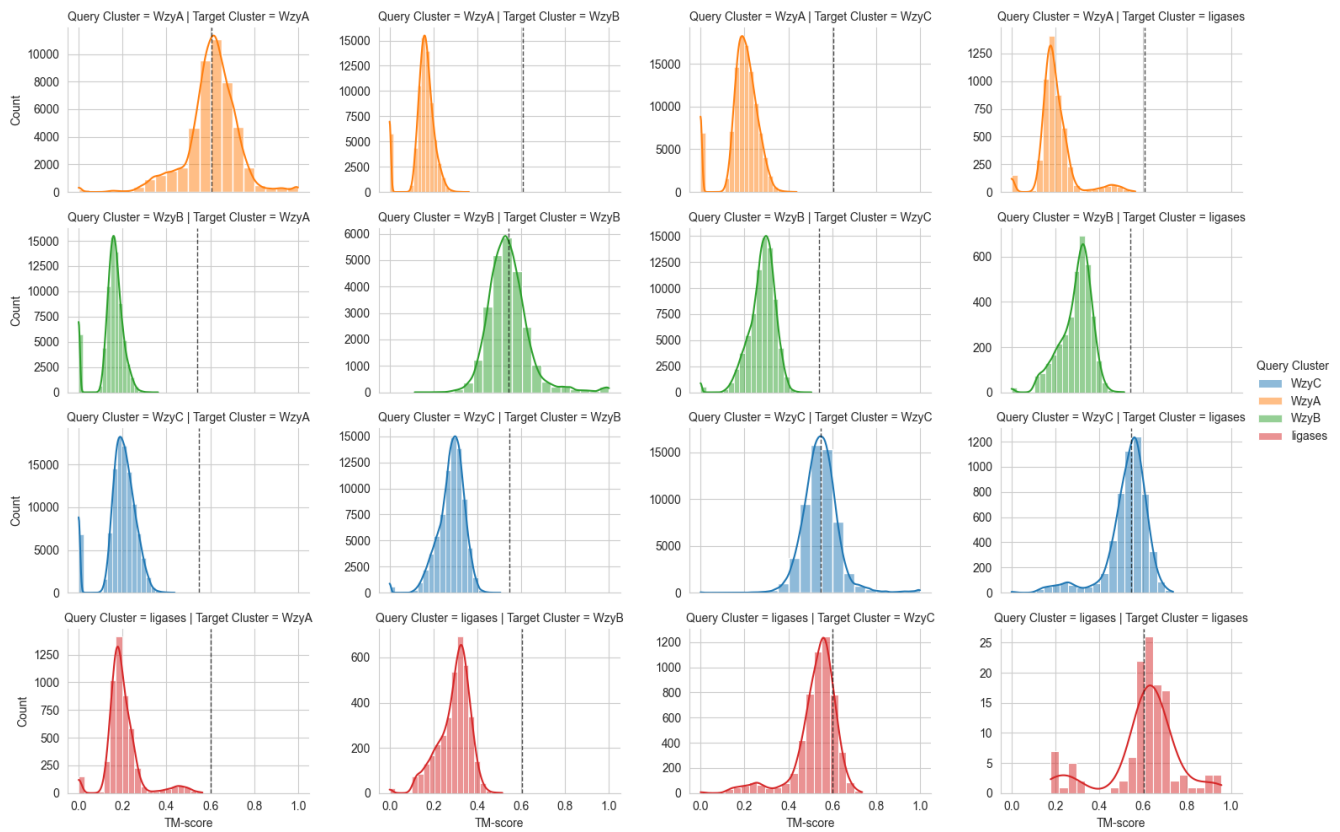

**Extended Data Figure 4.** Pairwise TM-score distributions for structural alignments between proteins that belong to the same cluster (diagonal) or different clusters. The grey dotted line represents the mean pairwise TM-score for protein alignments along the diagonal.

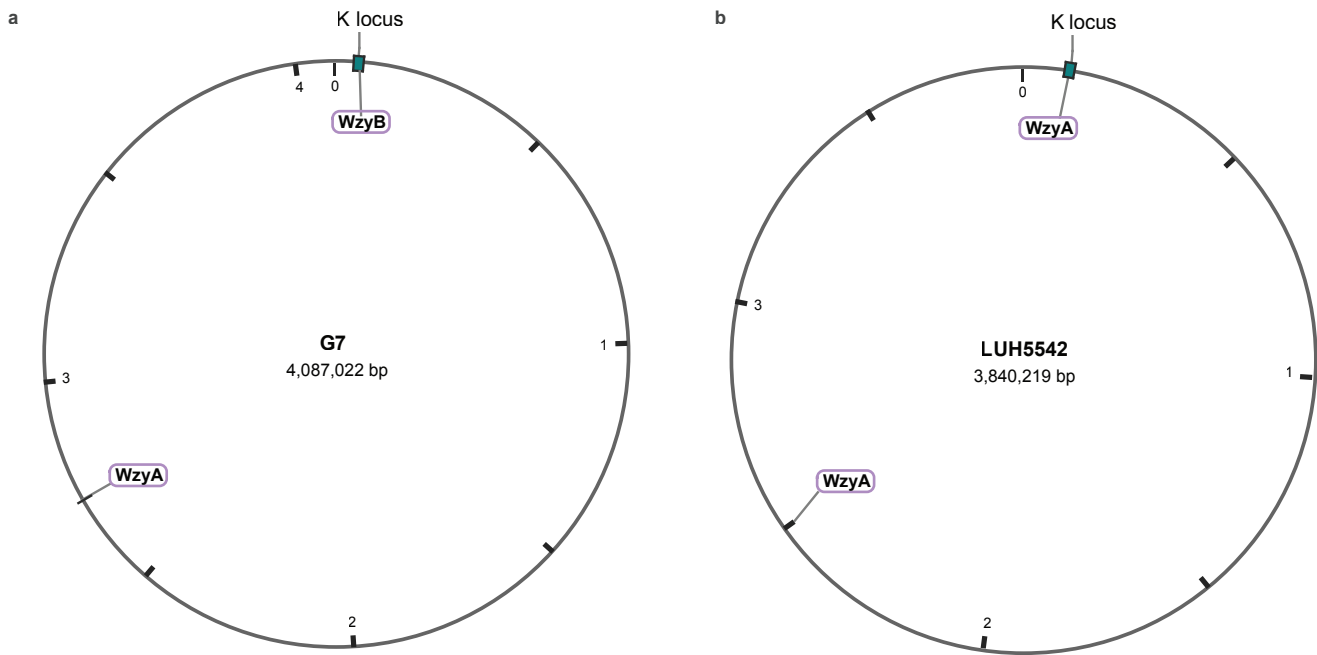

**Extended data Figure 5. Chromosome maps of *A. baumannii* isolates G7 (a) and LUH5542 (b).** Sequences drawn to scale from NCBI accession numbers CP175642.1 (G7) and CP195996.1 (LUH5542). Location of the K locus in each chromosome is indicated by a green box. Positions of detected Wzy are shown. Megabase coordinates are shown inside the circles.

**Extended Data Table 1.** Analysis of the major loops in WzyA, WzyB and WzyC sequences

| Family | Loop | Length<br>range<br>(aa) | Median<br>length<br>(aa) | Mean<br>length<br>(aa) | Enriched amino acids    | % sequences with |      |      |                   |
|--------|------|-------------------------|--------------------------|------------------------|-------------------------|------------------|------|------|-------------------|
|        |      |                         |                          |                        |                         | R                | G    | H    | RX <sub>n</sub> G |
| WzyA   | PL1  | 23-70                   | 50                       | 50.2                   | Y,W,F,N,M,I,L,D,A       | 81.0             | 94.0 | 42.6 | 41.2              |
|        | PL2  | 11-67                   | 30                       | 30.4                   | Y,W,M,N,A,L,I,S,F       | 44.3             | 90.0 | 24.2 | 17.8              |
| WzyB   | PL1  | 7-38                    | 22                       | 23.1                   | M,A,Y,N,E,I,L,D,S,G,F,C | 65.5             | 99.6 | 28.4 | 11.8              |
|        | PL2  | 70-138                  | 98                       | 98.6                   | Y,F,N,I,S,M,L,W,G,D     | 92.1             | 100  | 67.2 | 32.8              |
|        | CL1  | 7-29                    | 16                       | 16.5                   | M,N,I,C,K,A,E,L,Y       | -                | -    | -    | -                 |
| WzyC   | PL1  | 8-55                    | 30                       | 28.8                   | M,F,Y,N,I,E,L,A,S,D     | 81.7             | 93.4 | 39.0 | 49.6              |
|        | PL2  | 51-108                  | 75                       | 75.5                   | M,F,Y,N,I,E,L,A,S,D     | 94.6             | 100  | 67.1 | 92.3              |

**Extended Data Table 2.** Sensitivity and specificity of Wzy HMM profile searches

| <b>HMM Set</b> | <b>N Seqs</b> | <b>N Wzy</b> | <b>TP</b> | <b>FN</b> | <b>FP</b> | <b>TN</b> | <b>Sensitivity</b> | <b>Specificity</b> |
|----------------|---------------|--------------|-----------|-----------|-----------|-----------|--------------------|--------------------|
| Pre-existing   | 8431          | 394          | 340       | 54        | 1         | 8036      | 0.862944           | 0.999876           |
| Novel          | 8431          | 394          | 393       | 1         | 4         | 8033      | 0.997462           | 0.999402           |

TP = true positive; FN = false negative; FP = false positive; TN = true negative
