# Supplementary material
Source: Research Square preprint supplement (doi:10.21203/rs.3.rs-9286338/v1)
Supplement: Supplementary file 1 [file f4f9671b743ff9f1663ebd7e.xlsx]

## Sheet: TABLE_S1
Supplementary Table 1. Information on Wzy polymerase sequences used in this study
Genus/species/complex	NCBI accession no. or source	pdb ID	Serotype/Locus	Length (aa)	No. of TMS	Pfam (Interproscan)	NCBIfam (Interproscan)	PANTHER (Interproscan)	Assigned cluster	Anomeric configuration	Donor substrate	Carbon positions	Acceptor substrate
A. baumannii	Acinetobacter_baumannii_k_locus_primary_reference (https://github.com/klebgenomics/Kaptive)	abaumannii_gi1	GI1	374	12	IPR007016	-	PTHR37422	WzyC	b	D-QuipNAc4NR	1,3	D-GalpNAc
A. baumannii	Acinetobacter_baumannii_k_locus_primary_reference (https://github.com/klebgenomics/Kaptive)	abaumannii_gi2	GI2	342	11	IPR049458	-	-	WzyA	b	D-GlcpNAc	1,3	D-Galp
A. baumannii	Acinetobacter_baumannii_k_locus_primary_reference (https://github.com/klebgenomics/Kaptive)	abaumannii_kl1	KL1	385	12	-	-	-	WzyC	b	D-QuipNAc4NR	1,4	D-GlcpNAc
A. baumannii	Acinetobacter_baumannii_k_locus_primary_reference (https://github.com/klebgenomics/Kaptive)	abaumannii_kl10	KL10	416	12	-	-	-	WzyC	-	-	-	-
A. baumannii	Acinetobacter_baumannii_k_locus_primary_reference (https://github.com/klebgenomics/Kaptive)	abaumannii_kl100	KL100	365	12	IPR049458	-	-	WzyA	-	-	-	-
A. baumannii	Acinetobacter_baumannii_k_locus_primary_reference (https://github.com/klebgenomics/Kaptive)	abaumannii_kl101	KL101	359	12	-	-	-	WzyC	-	-	-	-
A. baumannii	Acinetobacter_baumannii_k_locus_primary_reference (https://github.com/klebgenomics/Kaptive)	abaumannii_kl102	KL102	455	12	IPR029468	-	-	WzyB	a	D-GlcpNAc	1,6	D-GlcpNAc
A. baumannii	Acinetobacter_baumannii_k_locus_primary_reference (https://github.com/klebgenomics/Kaptive)	abaumannii_kl103	KL103	378	12	-	-	-	WzyC	-	-	-	-
A. baumannii	Acinetobacter_baumannii_k_locus_primary_reference (https://github.com/klebgenomics/Kaptive)	abaumannii_kl104	KL104	378	12	-	-	-	WzyC	b	D-GlcpNAc	1,2	D-Galp
A. baumannii	Acinetobacter_baumannii_k_locus_primary_reference (https://github.com/klebgenomics/Kaptive)	abaumannii_kl105	KL105	344	12	IPR049458	-	-	WzyA	-	-	-	-
A. baumannii	Acinetobacter_baumannii_k_locus_primary_reference (https://github.com/klebgenomics/Kaptive)	abaumannii_kl106	KL106	344	12	IPR049458	-	-	WzyA	b	D-GlcpNAc	1,4	D-GlcpNAc
A. baumannii	Acinetobacter_baumannii_k_locus_primary_reference (https://github.com/klebgenomics/Kaptive)	abaumannii_kl107	KL107	385	12	-	-	-	WzyC	-	-	-	-
A. baumannii	Acinetobacter_baumannii_k_locus_primary_reference (https://github.com/klebgenomics/Kaptive)	abaumannii_kl108	KL108	365	12	-	-	-	WzyC	-	-	-	-
A. baumannii	Acinetobacter_baumannii_k_locus_primary_reference (https://github.com/klebgenomics/Kaptive)	abaumannii_kl109	KL109	311	11	-	-	-	WzyA	-	-	-	-
A. baumannii	Acinetobacter_baumannii_k_locus_primary_reference (https://github.com/klebgenomics/Kaptive)	abaumannii_kl11	KL11	354	12	IPR049458	-	-	WzyA	b	D-GlcpNAc	1,3	L-Rhap
A. baumannii	Acinetobacter_baumannii_k_locus_primary_reference (https://github.com/klebgenomics/Kaptive)	abaumannii_kl110	KL110	425	12	IPR029468	-	-	WzyB	-	-	-	-
A. baumannii	Acinetobacter_baumannii_k_locus_primary_reference (https://github.com/klebgenomics/Kaptive)	abaumannii_kl111	KL111	353	12	IPR049458	-	-	WzyA	b	D-GlcpNAc	1,3	L-Rhap
A. baumannii	Acinetobacter_baumannii_k_locus_primary_reference (https://github.com/klebgenomics/Kaptive)	abaumannii_kl112	KL112	350	12	IPR049458	-	-	WzyA	b	D-GlcpNAc	1,3	D-GlcpNAc
A. baumannii	Acinetobacter_baumannii_k_locus_primary_reference (https://github.com/klebgenomics/Kaptive)	abaumannii_kl113	KL113	397	11	IPR007016	-	-	WzyC	-	-	-	-
A. baumannii	Acinetobacter_baumannii_k_locus_primary_reference (https://github.com/klebgenomics/Kaptive)	abaumannii_kl114	KL114	369	12	IPR049458	-	-	WzyA	-	-	-	-
A. baumannii	Acinetobacter_baumannii_k_locus_primary_reference (https://github.com/klebgenomics/Kaptive)	abaumannii_kl115	KL115	368	10	-	-	-	WzyA	-	-	-	-
A. baumannii	Acinetobacter_baumannii_k_locus_primary_reference (https://github.com/klebgenomics/Kaptive)	abaumannii_kl116	KL116	346	11	IPR049458	-	-	WzyA	b	D-GalpNAc	1,3	D-Galp
A. baumannii	Acinetobacter_baumannii_k_locus_primary_reference (https://github.com/klebgenomics/Kaptive)	abaumannii_kl117	KL117	330	11	IPR049458	-	-	WzyA	-	-	-	-
A. baumannii	Acinetobacter_baumannii_k_locus_primary_reference (https://github.com/klebgenomics/Kaptive)	abaumannii_kl118	KL118	417	12	IPR007016	-	-	WzyC	-	-	-	-
A. baumannii	Acinetobacter_baumannii_k_locus_primary_reference (https://github.com/klebgenomics/Kaptive)	abaumannii_kl119	KL119	357	12	IPR049458	-	-	WzyA	-	-	-	-
A. baumannii	Acinetobacter_baumannii_k_locus_primary_reference (https://github.com/klebgenomics/Kaptive)	abaumannii_kl12	KL12	425	12	IPR029468	-	-	WzyB	a	D-FucpNAc	1,3	D-GalpNAc
A. baumannii	Acinetobacter_baumannii_k_locus_primary_reference (https://github.com/klebgenomics/Kaptive)	abaumannii_kl120	KL120	329	11	-	-	-	WzyA	-	-	-	-
A. baumannii	Acinetobacter_baumannii_k_locus_primary_reference (https://github.com/klebgenomics/Kaptive)	abaumannii_kl121	KL121	329	11	IPR049458	-	-	WzyA	-	-	-	-
A. baumannii	Acinetobacter_baumannii_k_locus_primary_reference (https://github.com/klebgenomics/Kaptive)	abaumannii_kl122	KL122	355	12	IPR049458	-	-	WzyA	-	-	-	-
A. baumannii	Acinetobacter_baumannii_k_locus_primary_reference (https://github.com/klebgenomics/Kaptive)	abaumannii_kl123	KL123	353	12	IPR049458	-	-	WzyA	-	-	-	-
A. baumannii	Acinetobacter_baumannii_k_locus_primary_reference (https://github.com/klebgenomics/Kaptive)	abaumannii_kl124	KL124	396	12	-	-	-	WzyC	-	-	-	-
A. baumannii	Acinetobacter_baumannii_k_locus_primary_reference (https://github.com/klebgenomics/Kaptive)	abaumannii_kl125	KL125	436	12	-	-	-	WzyB	a	D-FucpNAc	1,4	D-ManpNAcA
A. baumannii	Acinetobacter_baumannii_k_locus_primary_reference (https://github.com/klebgenomics/Kaptive)	abaumannii_kl126	KL126	414	12	IPR007016	-	-	WzyC	-	-	-	-
A. baumannii	Acinetobacter_baumannii_k_locus_primary_reference (https://github.com/klebgenomics/Kaptive)	abaumannii_kl127	KL127	398	11	IPR049458	-	-	WzyA	b	D-GalpNAc	1,4	D-Galp
A. baumannii	Acinetobacter_baumannii_k_locus_primary_reference (https://github.com/klebgenomics/Kaptive)	abaumannii_kl128	KL128	398	11	IPR049458	-	-	WzyA	b	D-GalpNAc	1,4	D-Galp
A. baumannii	Acinetobacter_baumannii_k_locus_primary_reference (https://github.com/klebgenomics/Kaptive)	abaumannii_kl129	KL129	322	11	IPR049458	-	-	WzyA	b	D-GlcpNAc	1,3	L-Rhap
A. baumannii	Acinetobacter_baumannii_k_locus_primary_reference (https://github.com/klebgenomics/Kaptive)	abaumannii_kl13	KL13	342	10	-	-	-	WzyB	a	D-FucpNAc	1,4	D-Galp
A. baumannii	Acinetobacter_baumannii_k_locus_primary_reference (https://github.com/klebgenomics/Kaptive)	abaumannii_kl130	KL130	409	11	IPR049458	-	-	WzyA	-	-	-	-
A. baumannii	Acinetobacter_baumannii_k_locus_primary_reference (https://github.com/klebgenomics/Kaptive)	abaumannii_kl131	KL131	390	12	IPR007016	-	PTHR37422	WzyC	-	-	-	-
A. baumannii	Acinetobacter_baumannii_k_locus_primary_reference (https://github.com/klebgenomics/Kaptive)	abaumannii_kl132	KL132	416	12	-	-	-	WzyC	-	-	-	-
A. baumannii	Acinetobacter_baumannii_k_locus_primary_reference (https://github.com/klebgenomics/Kaptive)	abaumannii_kl133	KL133	396	12	-	-	-	WzyC	-	-	-	-
A. baumannii	Acinetobacter_baumannii_k_locus_primary_reference (https://github.com/klebgenomics/Kaptive)	abaumannii_kl134-1	KL134-1	420	10	IPR029468	-	-	WzyB	-	-	-	-
A. baumannii	Acinetobacter_baumannii_k_locus_primary_reference (https://github.com/klebgenomics/Kaptive)	abaumannii_kl134-2	KL134-2	370	12	-	-	-	WzyC	-	-	-	-
A. baumannii	Acinetobacter_baumannii_k_locus_primary_reference (https://github.com/klebgenomics/Kaptive)	abaumannii_kl135	KL135	357	12	IPR049458	-	-	WzyA	b	D-GlcpNAc	1,3	D-GlcpNAc
A. baumannii	Acinetobacter_baumannii_k_locus_primary_reference (https://github.com/klebgenomics/Kaptive)	abaumannii_kl136	KL136	433	12	-	-	-	WzyB	-	-	-	-
A. baumannii	Acinetobacter_baumannii_k_locus_primary_reference (https://github.com/klebgenomics/Kaptive)	abaumannii_kl137	KL137	473	12	-	-	-	WzyB	-	-	-	-
A. baumannii	Acinetobacter_baumannii_k_locus_primary_reference (https://github.com/klebgenomics/Kaptive)	abaumannii_kl138	KL138	357	12	IPR049458	-	-	WzyA	-	-	-	-
A. baumannii	Acinetobacter_baumannii_k_locus_primary_reference (https://github.com/klebgenomics/Kaptive)	abaumannii_kl139	KL139	460	12	IPR029468	-	-	WzyB	a	D-GalpNAc	1,4	D-GalpNAc
A. baumannii	Acinetobacter_baumannii_k_locus_primary_reference (https://github.com/klebgenomics/Kaptive)	abaumannii_kl14	KL14	460	12	IPR029468	-	-	WzyB	a	D-GalpNAc	1,4	D-GalpNAc
A. baumannii	Acinetobacter_baumannii_k_locus_primary_reference (https://github.com/klebgenomics/Kaptive)	abaumannii_kl140	KL140	369	12	-	-	-	WzyC	-	-	-	-
A. baumannii	Acinetobacter_baumannii_k_locus_primary_reference (https://github.com/klebgenomics/Kaptive)	abaumannii_kl141	KL141	351	12	IPR049458	-	-	WzyA	b	D-GlcpNAc	1,3	D-GlcpNAc
A. baumannii	Acinetobacter_baumannii_k_locus_primary_reference (https://github.com/klebgenomics/Kaptive)	abaumannii_kl142	KL142	330	11	IPR049458	-	-	WzyA	-	-	-	-
A. baumannii	Acinetobacter_baumannii_k_locus_primary_reference (https://github.com/klebgenomics/Kaptive)	abaumannii_kl143	KL143	328	11	IPR049458	-	-	WzyA	-	-	-	-
A. baumannii	Acinetobacter_baumannii_k_locus_primary_reference (https://github.com/klebgenomics/Kaptive)	abaumannii_kl144	KL144	321	11	IPR049458	-	-	WzyA	b	D-GlcpNAc	1,3	L-Rhap
A. baumannii	Acinetobacter_baumannii_k_locus_primary_reference (https://github.com/klebgenomics/Kaptive)	abaumannii_kl145	KL145	375	12	-	-	-	WzyC	-	-	-	-
A. baumannii	Acinetobacter_baumannii_k_locus_primary_reference (https://github.com/klebgenomics/Kaptive)	abaumannii_kl146	KL146	430	11	-	TIGR04370	-	WzyB	-	-	-	-
A. baumannii	Acinetobacter_baumannii_k_locus_primary_reference (https://github.com/klebgenomics/Kaptive)	abaumannii_kl147	KL147	468	12	-	-	-	WzyB	-	-	-	-
A. baumannii	Acinetobacter_baumannii_k_locus_primary_reference (https://github.com/klebgenomics/Kaptive)	abaumannii_kl148	KL148	373	12	IPR049458	-	-	WzyA	-	-	-	-
A. baumannii	Acinetobacter_baumannii_k_locus_primary_reference (https://github.com/klebgenomics/Kaptive)	abaumannii_kl149	KL149	311	11	-	-	-	WzyA	-	-	-	-
A. baumannii	Acinetobacter_baumannii_k_locus_primary_reference (https://github.com/klebgenomics/Kaptive)	abaumannii_kl15	KL15	468	12	-	-	-	WzyB	a	D-QuipNAc4NAc	1,3	D-QuipNAc4NAc
A. baumannii	Acinetobacter_baumannii_k_locus_primary_reference (https://github.com/klebgenomics/Kaptive)	abaumannii_kl150	KL150	388	12	-	-	-	WzyC	-	-	-	-
A. baumannii	Acinetobacter_baumannii_k_locus_primary_reference (https://github.com/klebgenomics/Kaptive)	abaumannii_kl151	KL151	396	12	-	-	-	WzyC	-	-	-	-
A. baumannii	Acinetobacter_baumannii_k_locus_primary_reference (https://github.com/klebgenomics/Kaptive)	abaumannii_kl152	KL152	396	12	-	-	-	WzyC	-	-	-	-
A. baumannii	Acinetobacter_baumannii_k_locus_primary_reference (https://github.com/klebgenomics/Kaptive)	abaumannii_kl153	KL153	368	12	-	-	-	WzyC	-	-	-	-
A. baumannii	Acinetobacter_baumannii_k_locus_primary_reference (https://github.com/klebgenomics/Kaptive)	abaumannii_kl154	KL154	396	10	-	-	-	WzyB	-	-	-	-
A. baumannii	Acinetobacter_baumannii_k_locus_primary_reference (https://github.com/klebgenomics/Kaptive)	abaumannii_kl155	KL155	363	12	-	-	-	WzyC	-	-	-	-
A. baumannii	Acinetobacter_baumannii_k_locus_primary_reference (https://github.com/klebgenomics/Kaptive)	abaumannii_kl156	KL156	360	12	-	-	-	WzyC	-	-	-	-
A. baumannii	Acinetobacter_baumannii_k_locus_primary_reference (https://github.com/klebgenomics/Kaptive)	abaumannii_kl157	KL157	455	12	IPR029468	-	-	WzyB	-	-	-	-
A. baumannii	Acinetobacter_baumannii_k_locus_primary_reference (https://github.com/klebgenomics/Kaptive)	abaumannii_kl158	KL158	385	10	-	-	-	WzyB	-	-	-	-
A. baumannii	Acinetobacter_baumannii_k_locus_primary_reference (https://github.com/klebgenomics/Kaptive)	abaumannii_kl159	KL159	310	10	IPR049458	-	-	WzyA	-	-	-	-
A. baumannii	Acinetobacter_baumannii_k_locus_primary_reference (https://github.com/klebgenomics/Kaptive)	abaumannii_kl16	KL16	381	12	-	-	-	WzyC	b	D-GlcpNAc	1,4	Pse5Ac7Ac
A. baumannii	Acinetobacter_baumannii_k_locus_primary_reference (https://github.com/klebgenomics/Kaptive)	abaumannii_kl160	KL160	326	12	IPR049458	-	-	WzyA	-	-	-	-
A. baumannii	Acinetobacter_baumannii_k_locus_primary_reference (https://github.com/klebgenomics/Kaptive)	abaumannii_kl161	KL161	417	12	IPR007016	-	-	WzyC	-	-	-	-
A. baumannii	Acinetobacter_baumannii_k_locus_primary_reference (https://github.com/klebgenomics/Kaptive)	abaumannii_kl162	KL162	344	12	IPR049458	-	-	WzyA	-	-	-	-
A. baumannii	Acinetobacter_baumannii_k_locus_primary_reference (https://github.com/klebgenomics/Kaptive)	abaumannii_kl163	KL163	338	12	IPR049458	-	-	WzyA	-	-	-	-
A. baumannii	Acinetobacter_baumannii_k_locus_primary_reference (https://github.com/klebgenomics/Kaptive)	abaumannii_kl164	KL164	365	12	IPR049458	-	-	WzyA	-	-	-	-
A. baumannii	Acinetobacter_baumannii_k_locus_primary_reference (https://github.com/klebgenomics/Kaptive)	abaumannii_kl165	KL165	277	10	-	-	-	WzyA	-	-	-	-
A. baumannii	Acinetobacter_baumannii_k_locus_primary_reference (https://github.com/klebgenomics/Kaptive)	abaumannii_kl166	KL166	265	10	IPR049458	-	-	WzyA	-	-	-	-
A. baumannii	Acinetobacter_baumannii_k_locus_primary_reference (https://github.com/klebgenomics/Kaptive)	abaumannii_kl167	KL167	381	12	-	-	-	WzyC	-	-	-	-
A. baumannii	Acinetobacter_baumannii_k_locus_primary_reference (https://github.com/klebgenomics/Kaptive)	abaumannii_kl168	KL168	311	11	-	-	-	WzyA	-	-	-	-
A. baumannii	Acinetobacter_baumannii_k_locus_primary_reference (https://github.com/klebgenomics/Kaptive)	abaumannii_kl169	KL169	326	12	IPR049458	-	-	WzyA	-	-	-	-
A. baumannii	Acinetobacter_baumannii_k_locus_primary_reference (https://github.com/klebgenomics/Kaptive)	abaumannii_kl17	KL17	432	11	-	TIGR04370	-	WzyB	b	D-QuipNAc4NAc	1,4	D-GalpNAcA
A. baumannii	Acinetobacter_baumannii_k_locus_primary_reference (https://github.com/klebgenomics/Kaptive)	abaumannii_kl170	KL170	326	12	IPR049458	-	-	WzyA	-	-	-	-
A. baumannii	Acinetobacter_baumannii_k_locus_primary_reference (https://github.com/klebgenomics/Kaptive)	abaumannii_kl171	KL171	427	12	IPR007016	-	PTHR37422	WzyC	-	-	-	-
A. baumannii	Acinetobacter_baumannii_k_locus_primary_reference (https://github.com/klebgenomics/Kaptive)	abaumannii_kl172	KL172	418	10	-	-	-	WzyB	-	-	-	-
A. baumannii	Acinetobacter_baumannii_k_locus_primary_reference (https://github.com/klebgenomics/Kaptive)	abaumannii_kl173	KL173	311	11	-	-	-	WzyA	-	-	-	-
A. baumannii	Acinetobacter_baumannii_k_locus_primary_reference (https://github.com/klebgenomics/Kaptive)	abaumannii_kl174	KL174	366	12	IPR007016	-	-	WzyC	-	-	-	-
A. baumannii	Acinetobacter_baumannii_k_locus_primary_reference (https://github.com/klebgenomics/Kaptive)	abaumannii_kl175	KL175	361	12	-	-	-	WzyC	-	-	-	-
A. baumannii	Acinetobacter_baumannii_k_locus_primary_reference (https://github.com/klebgenomics/Kaptive)	abaumannii_kl176	KL176	356	12	IPR049458	-	-	WzyA	-	-	-	-
A. baumannii	Acinetobacter_baumannii_k_locus_primary_reference (https://github.com/klebgenomics/Kaptive)	abaumannii_kl177	KL177	326	12	IPR049458	-	-	WzyA	-	-	-	-
A. baumannii	Acinetobacter_baumannii_k_locus_primary_reference (https://github.com/klebgenomics/Kaptive)	abaumannii_kl178	KL178	357	12	IPR049458	-	-	WzyA	-	-	-	-
A. baumannii	Acinetobacter_baumannii_k_locus_primary_reference (https://github.com/klebgenomics/Kaptive)	abaumannii_kl179	KL179	445	12	-	-	-	WzyB	-	-	-	-
A. baumannii	Acinetobacter_baumannii_k_locus_primary_reference (https://github.com/klebgenomics/Kaptive)	abaumannii_kl18	KL18	432	11	-	TIGR04370	-	WzyB	-	-	-	-
A. baumannii	Acinetobacter_baumannii_k_locus_primary_reference (https://github.com/klebgenomics/Kaptive)	abaumannii_kl180	KL180	393	12	-	-	-	WzyC	-	-	-	-
A. baumannii	Acinetobacter_baumannii_k_locus_primary_reference (https://github.com/klebgenomics/Kaptive)	abaumannii_kl181	KL181	355	12	IPR049458	-	-	WzyA	-	-	-	-
A. baumannii	Acinetobacter_baumannii_k_locus_primary_reference (https://github.com/klebgenomics/Kaptive)	abaumannii_kl182	KL182	407	12	IPR007016	-	PTHR37422	WzyC	-	-	-	-
A. baumannii	Acinetobacter_baumannii_k_locus_primary_reference (https://github.com/klebgenomics/Kaptive)	abaumannii_kl183	KL183	324	11	IPR049458	-	-	WzyA	-	-	-	-
A. baumannii	Acinetobacter_baumannii_k_locus_primary_reference (https://github.com/klebgenomics/Kaptive)	abaumannii_kl184	KL184	427	12	-	-	-	WzyB	-	-	-	-
A. baumannii	Acinetobacter_baumannii_k_locus_primary_reference (https://github.com/klebgenomics/Kaptive)	abaumannii_kl185	KL185	404	12	-	-	-	WzyC	-	-	-	-
A. baumannii	Acinetobacter_baumannii_k_locus_primary_reference (https://github.com/klebgenomics/Kaptive)	abaumannii_kl186	KL186	330	11	IPR049458	-	-	WzyA	-	-	-	-
A. baumannii	Acinetobacter_baumannii_k_locus_primary_reference (https://github.com/klebgenomics/Kaptive)	abaumannii_kl187	KL187	368	12	-	-	-	WzyC	-	-	-	-
A. baumannii	Acinetobacter_baumannii_k_locus_primary_reference (https://github.com/klebgenomics/Kaptive)	abaumannii_kl188	KL188	364	12	-	-	-	WzyC	-	-	-	-
A. baumannii	Acinetobacter_baumannii_k_locus_primary_reference (https://github.com/klebgenomics/Kaptive)	abaumannii_kl189	KL189	355	12	IPR049458	-	-	WzyA	-	-	-	-
A. baumannii	Acinetobacter_baumannii_k_locus_primary_reference (https://github.com/klebgenomics/Kaptive)	abaumannii_kl190	KL190	378	12	-	-	-	WzyC	-	-	-	-
A. baumannii	Acinetobacter_baumannii_k_locus_primary_reference (https://github.com/klebgenomics/Kaptive)	abaumannii_kl191	KL191	430	12	-	-	-	WzyB	-	-	-	-
A. baumannii	Acinetobacter_baumannii_k_locus_primary_reference (https://github.com/klebgenomics/Kaptive)	abaumannii_kl192	KL192	406	11	-	TIGR04370	-	WzyB	-	-	-	-
A. baumannii	Acinetobacter_baumannii_k_locus_primary_reference (https://github.com/klebgenomics/Kaptive)	abaumannii_kl193	KL193	310	10	IPR049458	-	-	WzyA	-	-	-	-
A. baumannii	Acinetobacter_baumannii_k_locus_primary_reference (https://github.com/klebgenomics/Kaptive)	abaumannii_kl194	KL194	426	12	IPR029468	-	-	WzyB	-	-	-	-
A. baumannii	Acinetobacter_baumannii_k_locus_primary_reference (https://github.com/klebgenomics/Kaptive)	abaumannii_kl195	KL195	354	12	IPR049458	-	-	WzyA	-	-	-	-
A. baumannii	Acinetobacter_baumannii_k_locus_primary_reference (https://github.com/klebgenomics/Kaptive)	abaumannii_kl196	KL196	343	11	IPR049458	-	-	WzyA	-	-	-	-
A. baumannii	Acinetobacter_baumannii_k_locus_primary_reference (https://github.com/klebgenomics/Kaptive)	abaumannii_kl197	KL197	347	11	IPR049458	-	-	WzyA	-	-	-	-
A. baumannii	Acinetobacter_baumannii_k_locus_primary_reference (https://github.com/klebgenomics/Kaptive)	abaumannii_kl198	KL198	321	11	IPR049458	-	-	WzyA	-	-	-	-
A. baumannii	Acinetobacter_baumannii_k_locus_primary_reference (https://github.com/klebgenomics/Kaptive)	abaumannii_kl199	KL199	420	12	-	-	-	WzyC	-	-	-	-
A. baumannii	Acinetobacter_baumannii_k_locus_primary_reference (https://github.com/klebgenomics/Kaptive)	abaumannii_kl2	KL2	326	12	IPR049458	-	-	WzyA	b	D-GalpNAc	1,3	D-Galp
A. baumannii	Acinetobacter_baumannii_k_locus_primary_reference (https://github.com/klebgenomics/Kaptive)	abaumannii_kl20	KL20	420	12	-	-	-	WzyC	b	D-QuipNAc4NR	1,2	D-Galp
A. baumannii	Acinetobacter_baumannii_k_locus_primary_reference (https://github.com/klebgenomics/Kaptive)	abaumannii_kl200	KL200	365	12	IPR049458	-	-	WzyA	-	-	-	-
A. baumannii	Acinetobacter_baumannii_k_locus_primary_reference (https://github.com/klebgenomics/Kaptive)	abaumannii_kl201	KL201	417	11	-	-	-	WzyB	-	-	-	-
A. baumannii	Acinetobacter_baumannii_k_locus_primary_reference (https://github.com/klebgenomics/Kaptive)	abaumannii_kl202	KL202	425	12	-	-	-	WzyB	-	-	-	-
A. baumannii	Acinetobacter_baumannii_k_locus_primary_reference (https://github.com/klebgenomics/Kaptive)	abaumannii_kl203	KL203	474	12	-	-	-	WzyB	-	-	-	-
A. baumannii	Acinetobacter_baumannii_k_locus_primary_reference (https://github.com/klebgenomics/Kaptive)	abaumannii_kl204	KL204	465	12	IPR029468	-	-	WzyB	-	-	-	-
A. baumannii	Acinetobacter_baumannii_k_locus_primary_reference (https://github.com/klebgenomics/Kaptive)	abaumannii_kl205	KL205	364	12	IPR007016	-	-	WzyC	-	-	-	-
A. baumannii	Acinetobacter_baumannii_k_locus_primary_reference (https://github.com/klebgenomics/Kaptive)	abaumannii_kl206	KL206	355	12	IPR049458	-	-	WzyA	-	-	-	-
A. baumannii	Acinetobacter_baumannii_k_locus_primary_reference (https://github.com/klebgenomics/Kaptive)	abaumannii_kl207	KL207	427	11	-	-	-	WzyB	-	-	-	-
A. baumannii	Acinetobacter_baumannii_k_locus_primary_reference (https://github.com/klebgenomics/Kaptive)	abaumannii_kl208	KL208	398	12	IPR007016	-	PTHR37422	WzyC	-	-	-	-
A. baumannii	Acinetobacter_baumannii_k_locus_primary_reference (https://github.com/klebgenomics/Kaptive)	abaumannii_kl209	KL209	378	12	IPR007016	-	-	WzyC	-	-	-	-
A. baumannii	Acinetobacter_baumannii_k_locus_primary_reference (https://github.com/klebgenomics/Kaptive)	abaumannii_kl21	KL21	417	12	-	-	-	WzyC	b	D-QuipNAc4NR	1,2	D-Galp
A. baumannii	Acinetobacter_baumannii_k_locus_primary_reference (https://github.com/klebgenomics/Kaptive)	abaumannii_kl210	KL210	363	12	-	-	-	WzyC	-	-	-	-
A. baumannii	Acinetobacter_baumannii_k_locus_primary_reference (https://github.com/klebgenomics/Kaptive)	abaumannii_kl211	KL211	355	12	IPR049458	-	-	WzyA	-	-	-	-
A. baumannii	Acinetobacter_baumannii_k_locus_primary_reference (https://github.com/klebgenomics/Kaptive)	abaumannii_kl212	KL212	425	12	IPR029468	-	-	WzyB	-	-	-	-
A. baumannii	Acinetobacter_baumannii_k_locus_primary_reference (https://github.com/klebgenomics/Kaptive)	abaumannii_kl213	KL213	364	12	-	-	-	WzyC	-	-	-	-
A. baumannii	Acinetobacter_baumannii_k_locus_primary_reference (https://github.com/klebgenomics/Kaptive)	abaumannii_kl214	KL214	444	12	IPR046303	-	-	WzyB	-	-	-	-
A. baumannii	Acinetobacter_baumannii_k_locus_primary_reference (https://github.com/klebgenomics/Kaptive)	abaumannii_kl215	KL215	413	12	IPR007016	-	PTHR37422	WzyC	-	-	-	-
A. baumannii	Acinetobacter_baumannii_k_locus_primary_reference (https://github.com/klebgenomics/Kaptive)	abaumannii_kl216	KL216	326	12	-	-	-	WzyA	-	-	-	-
A. baumannii	Acinetobacter_baumannii_k_locus_primary_reference (https://github.com/klebgenomics/Kaptive)	abaumannii_kl217	KL217	324	11	IPR049458	-	-	WzyA	-	-	-	-
A. baumannii	Acinetobacter_baumannii_k_locus_primary_reference (https://github.com/klebgenomics/Kaptive)	abaumannii_kl218	KL218	329	11	-	-	-	WzyA	b	D-GalpNAc	1,3	D-Galp
A. baumannii	Acinetobacter_baumannii_k_locus_primary_reference (https://github.com/klebgenomics/Kaptive)	abaumannii_kl219	KL219	431	11	-	-	-	WzyB	-	-	-	-
A. baumannii	Acinetobacter_baumannii_k_locus_primary_reference (https://github.com/klebgenomics/Kaptive)	abaumannii_kl22	KL22	346	11	IPR049458	-	-	WzyA	b	D-GalpNAc	1,3	D-Galp
A. baumannii	Acinetobacter_baumannii_k_locus_primary_reference (https://github.com/klebgenomics/Kaptive)	abaumannii_kl220	KL220	322	11	IPR049458	-	-	WzyA	-	-	-	-
A. baumannii	Acinetobacter_baumannii_k_locus_primary_reference (https://github.com/klebgenomics/Kaptive)	abaumannii_kl221	KL221	395	12	IPR007016	-	PTHR37422	WzyC	-	-	-	-
A. baumannii	Acinetobacter_baumannii_k_locus_primary_reference (https://github.com/klebgenomics/Kaptive)	abaumannii_kl222	KL222	455	12	IPR029468	-	-	WzyB	-	-	-	-
A. baumannii	Acinetobacter_baumannii_k_locus_primary_reference (https://github.com/klebgenomics/Kaptive)	abaumannii_kl223	KL223	455	12	IPR029468	-	-	WzyB	a	D-GlcpNAc	1,6	D-Glcp
A. baumannii	Acinetobacter_baumannii_k_locus_primary_reference (https://github.com/klebgenomics/Kaptive)	abaumannii_kl224	KL224	342	12	IPR049458	-	-	WzyA	-	-	-	-
A. baumannii	Acinetobacter_baumannii_k_locus_primary_reference (https://github.com/klebgenomics/Kaptive)	abaumannii_kl225	KL225	326	12	IPR049458	-	-	WzyA	-	-	-	-
A. baumannii	Acinetobacter_baumannii_k_locus_primary_reference (https://github.com/klebgenomics/Kaptive)	abaumannii_kl226	KL226	387	11	-	TIGR04370	-	WzyB	-	-	-	-
A. baumannii	Acinetobacter_baumannii_k_locus_primary_reference (https://github.com/klebgenomics/Kaptive)	abaumannii_kl227	KL227	410	10	-	-	-	WzyB	-	-	-	-
A. baumannii	Acinetobacter_baumannii_k_locus_primary_reference (https://github.com/klebgenomics/Kaptive)	abaumannii_kl228	KL228	412	11	-	-	-	WzyB	-	-	-	-
A. baumannii	Acinetobacter_baumannii_k_locus_primary_reference (https://github.com/klebgenomics/Kaptive)	abaumannii_kl229	KL229	375	12	-	-	-	WzyC	-	-	-	-
A. baumannii	Acinetobacter_baumannii_k_locus_primary_reference (https://github.com/klebgenomics/Kaptive)	abaumannii_kl23	KL23	446	12	IPR046303	-	-	WzyB	-	-	-	-
A. baumannii	Acinetobacter_baumannii_k_locus_primary_reference (https://github.com/klebgenomics/Kaptive)	abaumannii_kl230	KL230	375	12	-	-	-	WzyC	-	-	-	-
A. baumannii	Acinetobacter_baumannii_k_locus_primary_reference (https://github.com/klebgenomics/Kaptive)	abaumannii_kl231	KL231	455	12	IPR029468	-	-	WzyB	-	-	-	-
A. baumannii	Acinetobacter_baumannii_k_locus_primary_reference (https://github.com/klebgenomics/Kaptive)	abaumannii_kl232	KL232	395	10	-	TIGR04370	-	WzyB	-	-	-	-
A. baumannii	Acinetobacter_baumannii_k_locus_primary_reference (https://github.com/klebgenomics/Kaptive)	abaumannii_kl233	KL233	360	12	-	-	-	WzyC	-	-	-	-
A. baumannii	Acinetobacter_baumannii_k_locus_primary_reference (https://github.com/klebgenomics/Kaptive)	abaumannii_kl234	KL234	324	11	IPR049458	-	-	WzyA	-	-	-	-
A. baumannii	Acinetobacter_baumannii_k_locus_primary_reference (https://github.com/klebgenomics/Kaptive)	abaumannii_kl235	KL235	445	12	IPR046303	-	-	WzyB	-	-	-	-
A. baumannii	Acinetobacter_baumannii_k_locus_primary_reference (https://github.com/klebgenomics/Kaptive)	abaumannii_kl236	KL236	412	11	-	-	-	WzyB	-	-	-	-
A. baumannii	Acinetobacter_baumannii_k_locus_primary_reference (https://github.com/klebgenomics/Kaptive)	abaumannii_kl237	KL237	432	11	-	TIGR04370	-	WzyB	-	-	-	-
A. baumannii	Acinetobacter_baumannii_k_locus_primary_reference (https://github.com/klebgenomics/Kaptive)	abaumannii_kl238	KL238	346	12	IPR049458	-	-	WzyA	-	-	-	-
A. baumannii	Acinetobacter_baumannii_k_locus_primary_reference (https://github.com/klebgenomics/Kaptive)	abaumannii_kl239	KL239	366	12	-	-	-	WzyC	b	D-GlcpNAc	1,2	L-Rhap
A. baumannii	Acinetobacter_baumannii_k_locus_primary_reference (https://github.com/klebgenomics/Kaptive)	abaumannii_kl240	KL240	365	12	-	-	-	WzyC	-	-	-	-
A. baumannii	Acinetobacter_baumannii_k_locus_primary_reference (https://github.com/klebgenomics/Kaptive)	abaumannii_kl241	KL241	324	11	IPR049458	-	-	WzyA	-	-	-	-
A. baumannii	Acinetobacter_baumannii_k_locus_primary_reference (https://github.com/klebgenomics/Kaptive)	abaumannii_kl25	KL25	417	11	-	-	-	WzyB	a	D-QuipNAc4NR	1,3	D-ManpNAcA
A. baumannii	Acinetobacter_baumannii_k_locus_primary_reference (https://github.com/klebgenomics/Kaptive)	abaumannii_kl26	KL26	373	12	IPR049458	-	-	WzyA	b	D-GlcpNAc	1,2	D-Manp
A. baumannii	Acinetobacter_baumannii_k_locus_primary_reference (https://github.com/klebgenomics/Kaptive)	abaumannii_kl27	KL27	410	11	IPR049458	-	-	WzyA	b	D-GalpNAc	1,4	D-Galp
A. baumannii	Acinetobacter_baumannii_k_locus_primary_reference (https://github.com/klebgenomics/Kaptive)	abaumannii_kl28	KL28	353	12	IPR049458	-	-	WzyA	-	-	-	-
A. baumannii	Acinetobacter_baumannii_k_locus_primary_reference (https://github.com/klebgenomics/Kaptive)	abaumannii_kl29	KL29	354	12	IPR049458	-	-	WzyA	-	-	-	-
A. baumannii	Acinetobacter_baumannii_k_locus_primary_reference (https://github.com/klebgenomics/Kaptive)	abaumannii_kl3	KL3	310	10	IPR049458	-	-	WzyA	b	D-GalpNAc	1,3	D-Galp
A. baumannii	Acinetobacter_baumannii_k_locus_primary_reference (https://github.com/klebgenomics/Kaptive)	abaumannii_kl30	KL30	378	12	-	-	-	WzyC	b	D-GalpNAc	1,2	D-Galp
A. baumannii	Acinetobacter_baumannii_k_locus_primary_reference (https://github.com/klebgenomics/Kaptive)	abaumannii_kl31	KL31	368	12	-	-	-	WzyC	-	-	-	-
A. baumannii	Acinetobacter_baumannii_k_locus_primary_reference (https://github.com/klebgenomics/Kaptive)	abaumannii_kl32	KL32	365	12	IPR049458	-	-	WzyA	b	D-GalpNAc	1,3	D-GalpNAc
A. baumannii	Acinetobacter_baumannii_k_locus_primary_reference (https://github.com/klebgenomics/Kaptive)	abaumannii_kl33	KL33	445	12	IPR046303	-	-	WzyB	a	D-GalpNAc	1,4	Pse5Ac7Ac
A. baumannii	Acinetobacter_baumannii_k_locus_primary_reference (https://github.com/klebgenomics/Kaptive)	abaumannii_kl34	KL34	420	12	-	-	-	WzyC	-	-	-	-
A. baumannii	Acinetobacter_baumannii_k_locus_primary_reference (https://github.com/klebgenomics/Kaptive)	abaumannii_kl35	KL35	361	10	-	-	-	WzyA	b	D-QuipNAc4NAc	1,3	D-GalpNAcA
A. baumannii	Acinetobacter_baumannii_k_locus_primary_reference (https://github.com/klebgenomics/Kaptive)	abaumannii_kl36	KL36	326	11	IPR049458	-	-	WzyA	-	-	-	-
A. baumannii	Acinetobacter_baumannii_k_locus_primary_reference (https://github.com/klebgenomics/Kaptive)	abaumannii_kl37	KL37	322	10	IPR049458	-	-	WzyA	b	D-GalpNAc	1,3	D-Galp
A. baumannii	Acinetobacter_baumannii_k_locus_primary_reference (https://github.com/klebgenomics/Kaptive)	abaumannii_kl38	KL38	327	11	IPR049458	-	-	WzyA	-	-	-	-
A. baumannii	Acinetobacter_baumannii_k_locus_primary_reference (https://github.com/klebgenomics/Kaptive)	abaumannii_kl4	KL4	450	12	IPR029468	-	-	WzyB	a	D-QuipNAc	1,4	D-GalpNAc
A. baumannii	Acinetobacter_baumannii_k_locus_primary_reference (https://github.com/klebgenomics/Kaptive)	abaumannii_kl40	KL40	430	12	-	-	-	WzyB	-	-	-	-
A. baumannii	Acinetobacter_baumannii_k_locus_primary_reference (https://github.com/klebgenomics/Kaptive)	abaumannii_kl41	KL41	345	11	IPR049458	-	-	WzyA	-	-	-	-
A. baumannii	Acinetobacter_baumannii_k_locus_primary_reference (https://github.com/klebgenomics/Kaptive)	abaumannii_kl42	KL42	326	12	-	-	-	WzyA	b	D-GalpNAc	1,3	D-Ribp
A. baumannii	Acinetobacter_baumannii_k_locus_primary_reference (https://github.com/klebgenomics/Kaptive)	abaumannii_kl43	KL43	455	12	IPR029468	-	-	WzyB	a	D-GlcpNAc	1,6	D-GlcpNAc
A. baumannii	Acinetobacter_baumannii_k_locus_primary_reference (https://github.com/klebgenomics/Kaptive)	abaumannii_kl44	KL44	361	12	-	-	-	WzyC	b	D-GalpNAc	1,4	Leg5Ac7R
A. baumannii	Acinetobacter_baumannii_k_locus_primary_reference (https://github.com/klebgenomics/Kaptive)	abaumannii_kl45	KL45	465	12	IPR029468	-	-	WzyB	a	D-GlcpNAc	1,4	D-GalpNAc
A. baumannii	Acinetobacter_baumannii_k_locus_primary_reference (https://github.com/klebgenomics/Kaptive)	abaumannii_kl46	KL46	329	11	-	-	-	WzyA	b	D-GalpNAc	1,3	D-Galp
A. baumannii	Acinetobacter_baumannii_k_locus_primary_reference (https://github.com/klebgenomics/Kaptive)	abaumannii_kl47	KL47	455	12	IPR029468	-	-	WzyB	a	D-GlcpNAc	1,6	D-GlcpNAc
A. baumannii	Acinetobacter_baumannii_k_locus_primary_reference (https://github.com/klebgenomics/Kaptive)	abaumannii_kl48	KL48	337	11	IPR049458	-	-	WzyA	b	D-GlcpNAc	1,3	D-Glcp
A. baumannii	Acinetobacter_baumannii_k_locus_primary_reference (https://github.com/klebgenomics/Kaptive)	abaumannii_kl49	KL49	427	12	-	-	-	WzyB	a	D-GlcpNAc	1,8	8eLeg5Ac7Ac
A. baumannii	Acinetobacter_baumannii_k_locus_primary_reference (https://github.com/klebgenomics/Kaptive)	abaumannii_kl5	KL5	329	11	IPR049458	-	-	WzyA	b	D-GalpNAc	1,3	D-Galp
A. baumannii	Acinetobacter_baumannii_k_locus_primary_reference (https://github.com/klebgenomics/Kaptive)	abaumannii_kl50	KL50	379	12	-	-	-	WzyC	-	-	-	-
A. baumannii	Acinetobacter_baumannii_k_locus_primary_reference (https://github.com/klebgenomics/Kaptive)	abaumannii_kl51	KL51	331	11	IPR049458	-	-	WzyA	-	-	-	-
A. baumannii	Acinetobacter_baumannii_k_locus_primary_reference (https://github.com/klebgenomics/Kaptive)	abaumannii_kl52	KL52	343	11	IPR049458	-	-	WzyA	b	D-GalpNAc	1,3	D-Galp
A. baumannii	Acinetobacter_baumannii_k_locus_primary_reference (https://github.com/klebgenomics/Kaptive)	abaumannii_kl53	KL53	378	11	-	-	-	WzyA	b	D-QuipNAc4NAc	1,3	D-GalpNAcA
A. baumannii	Acinetobacter_baumannii_k_locus_primary_reference (https://github.com/klebgenomics/Kaptive)	abaumannii_kl54	KL54	399	12	IPR049458	-	-	WzyA	b	D-GlcpNAc	1,4	D-GalpNAc
A. baumannii	Acinetobacter_baumannii_k_locus_primary_reference (https://github.com/klebgenomics/Kaptive)	abaumannii_kl55	KL55	365	12	IPR049458	-	-	WzyA	b	D-GlcpNAc	1,3	L-Rhap
A. baumannii	Acinetobacter_baumannii_k_locus_primary_reference (https://github.com/klebgenomics/Kaptive)	abaumannii_kl56	KL56	326	12	IPR049458	-	-	WzyA	-	-	-	-
A. baumannii	Acinetobacter_baumannii_k_locus_primary_reference (https://github.com/klebgenomics/Kaptive)	abaumannii_kl57	KL57	389	10	-	NF033860	-	WzyB	a	D-GalpNAc	1,3	D-Quip4NAc
A. baumannii	Acinetobacter_baumannii_k_locus_primary_reference (https://github.com/klebgenomics/Kaptive)	abaumannii_kl58	KL58	326	12	IPR049458	-	-	WzyA	b	D-GalpNAc	1,3	D-Glcp
A. baumannii	Acinetobacter_baumannii_k_locus_primary_reference (https://github.com/klebgenomics/Kaptive)	abaumannii_kl59	KL59	396	12	IPR049458	-	-	WzyA	-	-	-	-
A. baumannii	Acinetobacter_baumannii_k_locus_primary_reference (https://github.com/klebgenomics/Kaptive)	abaumannii_kl6	KL6	435	12	IPR046303	-	-	WzyB	a	D-GalpNAc	1,4	Pse5Ac7Ac
A. baumannii	Acinetobacter_baumannii_k_locus_primary_reference (https://github.com/klebgenomics/Kaptive)	abaumannii_kl60	KL60	355	12	IPR049458	-	-	WzyA	-	-	-	-
A. baumannii	Acinetobacter_baumannii_k_locus_primary_reference (https://github.com/klebgenomics/Kaptive)	abaumannii_kl61	KL61	346	12	IPR049458	-	-	WzyA	-	-	-	-
A. baumannii	Acinetobacter_baumannii_k_locus_primary_reference (https://github.com/klebgenomics/Kaptive)	abaumannii_kl62	KL62	365	12	-	-	-	WzyC	-	-	-	-
A. baumannii	Acinetobacter_baumannii_k_locus_primary_reference (https://github.com/klebgenomics/Kaptive)	abaumannii_kl63	KL63	406	11	-	TIGR04370	-	WzyB	a	D-GlcpNAc	1,4	Leg5Ac7R
A. baumannii	Acinetobacter_baumannii_k_locus_primary_reference (https://github.com/klebgenomics/Kaptive)	abaumannii_kl64	KL64	326	12	IPR049458	-	-	WzyA	-	-	-	-
A. baumannii	Acinetobacter_baumannii_k_locus_primary_reference (https://github.com/klebgenomics/Kaptive)	abaumannii_kl65	KL65	378	12	-	-	-	WzyC	-	-	-	-
A. baumannii	Acinetobacter_baumannii_k_locus_primary_reference (https://github.com/klebgenomics/Kaptive)	abaumannii_kl66	KL66	471	12	IPR029468	-	-	WzyB	-	-	-	-
A. baumannii	Acinetobacter_baumannii_k_locus_primary_reference (https://github.com/klebgenomics/Kaptive)	abaumannii_kl67-1	KL67-1	420	10	IPR029468	-	-	WzyB	-	-	-	-
A. baumannii	Acinetobacter_baumannii_k_locus_primary_reference (https://github.com/klebgenomics/Kaptive)	abaumannii_kl67-2	KL67-2	370	12	-	-	-	WzyC	-	-	-	-
A. baumannii	Acinetobacter_baumannii_k_locus_primary_reference (https://github.com/klebgenomics/Kaptive)	abaumannii_kl68	KL68	356	12	-	-	-	WzyC	-	-	-	-
A. baumannii	Acinetobacter_baumannii_k_locus_primary_reference (https://github.com/klebgenomics/Kaptive)	abaumannii_kl69	KL69	364	12	IPR007016	-	-	WzyC	-	-	-	-
A. baumannii	Acinetobacter_baumannii_k_locus_primary_reference (https://github.com/klebgenomics/Kaptive)	abaumannii_kl7	KL7	353	12	IPR049458	-	-	WzyA	b	D-GalpNAc	1,3	D-GlcpNAc
A. baumannii	Acinetobacter_baumannii_k_locus_primary_reference (https://github.com/klebgenomics/Kaptive)	abaumannii_kl70	KL70	311	11	-	-	-	WzyA	b	D-FucpNAc	1,3	D-GalpNAcA
A. baumannii	Acinetobacter_baumannii_k_locus_primary_reference (https://github.com/klebgenomics/Kaptive)	abaumannii_kl71	KL71	359	12	IPR049458	-	-	WzyA	b	D-GlcpNAc	1,3	L-Rhap
A. baumannii	Acinetobacter_baumannii_k_locus_primary_reference (https://github.com/klebgenomics/Kaptive)	abaumannii_kl72	KL72	368	10	-	-	-	WzyA	-	-	-	-
A. baumannii	Acinetobacter_baumannii_k_locus_primary_reference (https://github.com/klebgenomics/Kaptive)	abaumannii_kl73	KL73	342	10	-	-	-	WzyB	a	D-FucpNAc	1,4	D-Galp
A. baumannii	Acinetobacter_baumannii_k_locus_primary_reference (https://github.com/klebgenomics/Kaptive)	abaumannii_kl74	KL74	412	13	IPR049458	-	-	WzyA	b	D-GlcpNAc	1,3	D-GlcpA
A. baumannii	Acinetobacter_baumannii_k_locus_primary_reference (https://github.com/klebgenomics/Kaptive)	abaumannii_kl75	KL75	425	12	IPR029468	-	-	WzyB	-	-	-	-
A. baumannii	Acinetobacter_baumannii_k_locus_primary_reference (https://github.com/klebgenomics/Kaptive)	abaumannii_kl76	KL76	390	12	-	-	-	WzyC	-	-	-	-
A. baumannii	Acinetobacter_baumannii_k_locus_primary_reference (https://github.com/klebgenomics/Kaptive)	abaumannii_kl77	KL77	445	12	IPR046303	-	-	WzyB	-	-	-	-
A. baumannii	Acinetobacter_baumannii_k_locus_primary_reference (https://github.com/klebgenomics/Kaptive)	abaumannii_kl78	KL78	431	12	-	TIGR04370	-	WzyB	-	-	-	-
A. baumannii	Acinetobacter_baumannii_k_locus_primary_reference (https://github.com/klebgenomics/Kaptive)	abaumannii_kl79	KL79	345	11	IPR049458	-	-	WzyA	-	-	-	-
A. baumannii	Acinetobacter_baumannii_k_locus_primary_reference (https://github.com/klebgenomics/Kaptive)	abaumannii_kl8	KL8	324	11	IPR049458	-	-	WzyA	b	D-GlcpNAc	1,3	D-GalpNAc
A. baumannii	Acinetobacter_baumannii_k_locus_primary_reference (https://github.com/klebgenomics/Kaptive)	abaumannii_kl80	KL80	346	12	IPR049458	-	-	WzyA	b	D-GlcpNAc	1,3	D-GalpNAc
A. baumannii	Acinetobacter_baumannii_k_locus_primary_reference (https://github.com/klebgenomics/Kaptive)	abaumannii_kl81	KL81	326	12	IPR049458	-	-	WzyA	-	-	-	-
A. baumannii	Acinetobacter_baumannii_k_locus_primary_reference (https://github.com/klebgenomics/Kaptive)	abaumannii_kl82	KL82	395	12	-	-	-	WzyC	b	D-GalpNAc	1,2	D-Galp
A. baumannii	Acinetobacter_baumannii_k_locus_primary_reference (https://github.com/klebgenomics/Kaptive)	abaumannii_kl83	KL83	344	12	IPR049458	-	-	WzyA	b	D-GlcpNAc	1,4	D-GlcpNAc
A. baumannii	Acinetobacter_baumannii_k_locus_primary_reference (https://github.com/klebgenomics/Kaptive)	abaumannii_kl84	KL84	385	10	-	-	-	WzyB	a	D-GlcpNAc	1,2	L-Rhap
A. baumannii	Acinetobacter_baumannii_k_locus_primary_reference (https://github.com/klebgenomics/Kaptive)	abaumannii_kl85	KL85	412	13	IPR049458	-	-	WzyA	b	D-GlcpNAc	1,3	D-GlcpA
A. baumannii	Acinetobacter_baumannii_k_locus_primary_reference (https://github.com/klebgenomics/Kaptive)	abaumannii_kl86	KL86	327	11	IPR049458	-	-	WzyA	b	D-GlcpNAc	1,3	L-Rhap
A. baumannii	Acinetobacter_baumannii_k_locus_primary_reference (https://github.com/klebgenomics/Kaptive)	abaumannii_kl87	KL87	327	11	IPR049458	-	-	WzyA	b	D-GlcpNAc	1,3	L-Rhap
A. baumannii	Acinetobacter_baumannii_k_locus_primary_reference (https://github.com/klebgenomics/Kaptive)	abaumannii_kl88	KL88	268	10	IPR049458	-	-	WzyA	b	D-GlcpNAc	1,2	D-Glcp
A. baumannii	Acinetobacter_baumannii_k_locus_primary_reference (https://github.com/klebgenomics/Kaptive)	abaumannii_kl89	KL89	355	12	IPR049458	-	-	WzyA	b	D-GlcpNAc	1,3	D-GalpNAc
A. baumannii	Acinetobacter_baumannii_k_locus_primary_reference (https://github.com/klebgenomics/Kaptive)	abaumannii_kl9	KL9	311	11	-	-	-	WzyA	b	D-GlcpNAc	1,3	D-GalpNAcA
A. baumannii	Acinetobacter_baumannii_k_locus_primary_reference (https://github.com/klebgenomics/Kaptive)	abaumannii_kl90	KL90	355	12	IPR049458	-	-	WzyA	b	D-GlcpNAc	1,3	D-GlcpNAc
A. baumannii	Acinetobacter_baumannii_k_locus_primary_reference (https://github.com/klebgenomics/Kaptive)	abaumannii_kl91	KL91	430	12	-	-	-	WzyB	a	D-FucpNAc	1,4	D-ManpNAcA
A. baumannii	Acinetobacter_baumannii_k_locus_primary_reference (https://github.com/klebgenomics/Kaptive)	abaumannii_kl92	KL92	420	12	IPR007016	-	PTHR37422	WzyC	b	D-Galp	1,4	L-Rhap
A. baumannii	Acinetobacter_baumannii_k_locus_primary_reference (https://github.com/klebgenomics/Kaptive)	abaumannii_kl93	KL93	326	12	IPR049458	-	-	WzyA	b	D-GalpNAc	1,3	D-Galp
A. baumannii	Acinetobacter_baumannii_k_locus_primary_reference (https://github.com/klebgenomics/Kaptive)	abaumannii_kl94	KL94	326	12	IPR049458	-	-	WzyA	-	-	-	-
A. baumannii	Acinetobacter_baumannii_k_locus_primary_reference (https://github.com/klebgenomics/Kaptive)	abaumannii_kl95	KL95	303	10	-	-	-	WzyC	b	D-GalpNAc	1,4	D-Galp
A. baumannii	Acinetobacter_baumannii_k_locus_primary_reference (https://github.com/klebgenomics/Kaptive)	abaumannii_kl96	KL96	337	11	IPR049458	-	-	WzyA	-	-	-	-
A. baumannii	Acinetobacter_baumannii_k_locus_primary_reference (https://github.com/klebgenomics/Kaptive)	abaumannii_kl97	KL97	342	10	-	-	-	WzyB	-	-	-	-
A. baumannii	Acinetobacter_baumannii_k_locus_primary_reference (https://github.com/klebgenomics/Kaptive)	abaumannii_kl98	KL98	324	11	IPR049458	-	-	WzyA	b	D-QuipNAc	1,3	D-GalpNAc
A. baumannii	Acinetobacter_baumannii_k_locus_primary_reference (https://github.com/klebgenomics/Kaptive)	abaumannii_kl99	KL99	399	12	IPR007016	-	-	WzyC	-	-	-	-
A. baumannii	Acinetobacter_baumannii_k_locus_primary_reference (https://github.com/klebgenomics/Kaptive)	abaumannii_ph1	1Ph	347	11	IPR049458	-	-	WzyA	b	D-GalpNAc	1,3	D-Galp
A. baumannii	Acinetobacter_baumannii_k_locus_primary_reference (https://github.com/klebgenomics/Kaptive)	abaumannii_ph2	2Ph	392	12	-	-	-	WzyC	b	D-GalpNAc	1,4	D-Galp
Citrobacter spp.	AWU66650.1	citrobacter_o16_awu66650.1	O16	407	13	IPR049458	-	-	WzyA	b	D-Galp	1,4	D-GalpNAc
Citrobacter spp.	AWU66755.1	citrobacter_o41_awu66755.1	O41	385	12	IPR049458	-	-	WzyA	b	D-GalpNAc	1,2	D-Glcp
Citrobacter spp.	AWU66665.1	citrobacter_o22_awu66665.1	O22	391	10	-	-	-	WzyB	a	D-Galp	1,2	D-Manp
Citrobacter spp.	AWU66675.1	citrobacter_o23_awu66675.1	O23	440	12	-	-	-	WzyB	a	D-GalpNAc	1,4	D-Manp
Citrobacter spp.	AWU66636.1	citrobacter_o12_awu66636.1	O12	368	12	-	-	-	WzyC	b	D-GlcpNAc	1,6	D-Galp
Citrobacter spp.	AWU66681.1	citrobacter_o24_awu66681.1	O24	386	12	-	-	-	WzyC	b	D-GlcpNAc	1,4	D-GlcpA
Citrobacter spp.	AWU66741.1	citrobacter_o38_awu66741.1	O38	423	12	IPR007016	-	PTHR37422	WzyC	b	D-Galp	1,4	L-Rhap
E. cloacae	QHR93215.1	ecloacae_o13_qhr93215.1	O13	336	11	IPR049458	-	-	WzyA	-	-	-	-
E. cloacae	QHR93244.1	ecloacae_o15_qhr93244.1	O15	365	12	IPR049458	-	-	WzyA	-	-	-	-
E. cloacae	QHR93298.1	ecloacae_o20_qhr93298.1	O20	351	12	IPR049458	-	-	WzyA	-	-	-	-
E. cloacae	QHR93318.1	ecloacae_o22_qhr93318.1	O22	409	13	IPR049458	-	-	WzyA	-	-	-	-
E. cloacae	QHR93353.1	ecloacae_o26_qhr93353.1	O26	383	12	IPR049458	-	-	WzyA	-	-	-	-
E. cloacae	QHR93104.1	ecloacae_o4_qhr93104.1	O4	395	12	IPR049458	-	-	WzyA	-	-	-	-
E. cloacae	QHR93136.1	ecloacae_o7_qhr93136.1	O7	382	12	IPR049458	-	-	WzyA	-	-	-	-
E. cloacae	QHR93177.1	ecloacae_o10_qhr93177.1	O10	442	12	-	-	-	WzyB	a	D-FucpNAc	1,6	D-Manp
E. cloacae	QHR93191.1	ecloacae_o11_qhr93191.1	O11	442	12	-	-	-	WzyB	-	-	-	-
E. cloacae	QHR93204.1	ecloacae_o12_qhr93204.1	O12	388	10	-	TIGR04370	-	WzyB	-	-	-	-
E. cloacae	QHR93227.1	ecloacae_o14_qhr93227.1	O14	441	12	IPR046303	-	-	WzyB	-	-	-	-
E. cloacae	QHR93256.1	ecloacae_o16_qhr93256.1	O16	382	10	-	TIGR04370	-	WzyB	-	-	-	-
E. cloacae	QHR93266.1	ecloacae_o17_qhr93266.1	O17	391	11	-	TIGR04370	-	WzyB	-	-	-	-
E. cloacae	QHR93279.1	ecloacae_o18_qhr93279.1	O18	437	11	-	-	-	WzyB	-	-	-	-
E. cloacae	QHR93285.1	ecloacae_o19_qhr93285.1	O19	424	11	IPR010691	-	-	WzyB	-	-	-	-
E. cloacae	QHR93310.1	ecloacae_o21_qhr93310.1	O21	440	12	IPR046303	-	-	WzyB	-	-	-	-
E. cloacae	QHR93343.1	ecloacae_o24_qhr93343.1	O24	434	11	IPR029468	TIGR04370	-	WzyB	-	-	-	-
E. cloacae	QHR93376.1	ecloacae_o27_qhr93376.1	O27	432	11	-	-	-	WzyB	-	-	-	-
E. cloacae	QHR93118.1	ecloacae_o5_qhr93118.1	O5	445	12	IPR046303	-	-	WzyB	-	-	-	-
E. cloacae	QHR93163.1	ecloacae_o9_qhr93163.1	O9	442	12	-	-	-	WzyB	-	-	-	-
E. cloacae	QHR93073.1	ecloacae_o1_qhr93073.1	O1	389	12	-	-	-	WzyC	-	-	-	-
E. cloacae	QHR93084.1	ecloacae_o3_qhr93084.1	O3	439	13	IPR007016	-	PTHR37422	WzyC	-	-	-	-
E. cloacae	QHR93392.1	ecloacae_o30_qhr93392.1	O30	379	12	IPR007016	-	-	WzyC	-	-	-	-
E. cloacae	QHR93127.1	ecloacae_o6_qhr93127.1	O6	416	12	-	-	-	WzyC	-	-	-	-
E. cloacae	QHR93146.1	ecloacae_o8_qhr93146.1	O8	411	12	IPR007016	-	PTHR37422	WzyC	-	-	-	-
E. coli	PAY77806.1	ecoli_eca_pay77806.1	ECA	450	11	IPR010691	NF002820	-	WzyB
E. coli	ADC54929.1	ecoli_o1_adc54929.1	O1	334	11	IPR049458	-	-	WzyA	b	D-GlcpNAc	1,3	L-Rhap
E. coli	AIG62532.1	ecoli_o10_aig62532.1	O10	347	12	IPR049458	-	-	WzyA	b	D-GlcpNAc	1,3	L-Rhap
E. coli	AIG62814.1	ecoli_o100_aig62814.1	O100	389	12	-	-	-	WzyC	b	D-GlcpNAc	1,2	L-Rhap
E. coli	AFS33314.1	ecoli_o102_afs33314.1	O102	376	12	-	-	-	WzyC	b	D-GalpNAc	1,4	D-Galp
E. coli	AAS73171.1	ecoli_o103_aas73171.1	O103	382	12	IPR049458	-	-	WzyA	b	D-GlcpNAc	1,2	D-Glcp
E. coli	AAK64372.1	ecoli_o104_aak64372.1	O104	370	12	IPR049458	-	-	WzyA	b	D-GalpNAc	1,4	D-Galp
E. coli	ACA24829.1	ecoli_o105_aca24829.1	O105	342	12	IPR049458	-	-	WzyA	b	D-GlcpNAc	1,3	L-Rhap
E. coli	AAY23745.1	ecoli_o106_aay23745.1	O106	443	12	-	-	-	WzyB	a	D-GlcpNAc	1,6	D-Manp
E. coli	ACH97132.1	ecoli_o107_ach97132.1	O107	440	11	IPR029468	TIGR04370	-	WzyB	a	D-GalpNAc	1,4	D-GalpNAc
E. coli	AJR19457.1	ecoli_o108_ajr19457.1	O108	412	11	-	TIGR04370	-	WzyB	a	D-GlcpNAc	1,4	8eLeg5Ac7Ac
E. coli	ADR74237.1	ecoli_o109_adr74237.1	O109	406	12	-	-	-	WzyC	b	D-GlcpNAc	1,4	D-Glcp
E. coli	ADV17650.1	ecoli_o11_adv17650.1	O11	411	12	IPR049458	-	-	WzyA	b	D-GalpNAc	1,4	D-GalpNAc
E. coli	BAQ01533.1	ecoli_o110_baq01533.1	O110	401	12	-	-	-	WzyC	b	D-GlcpNAc	1,4	D-GalpA6DalloThr
E. coli	AAD46730.1	ecoli_o111_aad46730.1	O111	350	11	-	-	-	WzyC	b	D-GlcpNAc	1,4	D-Glcp
E. coli	ACD37086.1	ecoli_o112ab_acd37086.1	O112ab	392	12	IPR049458	-	-	WzyA	b	D-GalpNAc	1,4	D-GalpNAc
E. coli	ACD37014.1	ecoli_o112ac_acd37014.1	O112ac	361	12	-	-	-	WzyC	b	D-GalpNAc	1,4	D-GalpNAc
E. coli	AAD50486.1	ecoli_o113_aad50486.1	O113	395	12	IPR049458	-	-	WzyA	b	D-GlcpNAc	1,4	D-GalpNAc
E. coli	AAT77177.1	ecoli_o114_aat77177.1	O114	443	11	-	TIGR04370	-	WzyB	a	D-GlcpNAc	1,4	D-Quip3NLSerAc
E. coli	ADN43838.1	ecoli_o115_adn43838.1	O115	355	11	-	-	-	WzyA	b	D-GlcpNAc	1,3	D-GlcpNAc
E. coli	BAQ01563.1	ecoli_o116_baq01563.1	O116	386	12	IPR049458	-	-	WzyA	b	D-GlcpNAc	1,2	D-Quip4NAc
E. coli	ACH97143.1	ecoli_o117_ach97143.1	O117	440	11	IPR029468	TIGR04370	-	WzyB	a	D-GalpNAc	1,4	D-GalpNAc
E. coli	ABM53642.1	ecoli_o118_abm53642.1	O118	366	12	IPR049458	-	-	WzyA	b	D-GlcpNAc	1,3	D-Ribitol
E. coli	ADB02825.1	ecoli_o119_adb02825.1	O119	400	10	-	NF033860	-	WzyB	a	D-GlcpNAc	1,2	D-Manp
E. coli	AIG62543.1	ecoli_o12_aig62543.1	O12	367	12	IPR049458	-	-	WzyA	b	D-GlcpNAc	1,2	D-Glcp
E. coli	BAQ01584.1	ecoli_o120_baq01584.1	O120	419	13	IPR049458	-	-	WzyA	b	D-GalpNAc	1,3	D-GlcpA
E. coli	AFC91472.1	ecoli_o121_afc91472.1	O121	396	10	-	NF033860	-	WzyB	a	D-GlcpNAc	1,3	D-Quip4NGlyAc
E. coli	BAQ02224.1	ecoli_o123_baq02224.1	O123	416	10	-	NF033860	-	WzyB	a	D-GlcpNAc	1,3	D-Quip4NDAlaR
E. coli	ACD37138.1	ecoli_o124_acd37138.1	O124	367	12	IPR049458	-	-	WzyA	b	D-GalpNAc	1,3	D-Galp
E. coli	AKM71200.1	ecoli_o125ab_akm71200.1	O125ab	440	12	-	-	-	WzyB	a	D-GalpNAc	1,4	D-GalpNAc
E. coli	ABE98419.1	ecoli_o126_abe98419.1	O126	347	12	-	-	-	WzyA	b	D-GlcpNAc	1,2	D-Manp
E. coli	AAR90892.1	ecoli_o127_aar90892.1	O127	388	10	-	-	-	WzyB	a	D-GalpNAc	1,2	L-Fucp3Ac/4Ac
E. coli	AAO37701.1	ecoli_o128_aao37701.1	O128	347	12	IPR049458	-	-	WzyA	b	D-GalpNAc	1,6	D-Galp
E. coli	ACD37181.1	ecoli_o129_acd37181.1	O129	382	12	-	-	-	WzyC	b	D-GlcpNAc	1,2	L-Rhap3Ac4Ac
E. coli	BAQ02138.1	ecoli_o13_baq02138.1	O13	382	12	-	-	-	WzyC	b	D-GlcpNAc	1,2	L-Rhap
E. coli	ACD37157.1	ecoli_o130_acd37157.1	O130	371	12	IPR007016	-	-	WzyC	b	D-GalpNAc	1,4	D-Galp
E. coli	AIG62402.1	ecoli_o131_aig62402.1	O131	434	13	IPR049458	-	-	WzyA	b	D-GalpNAc	1,8	Neu5Ac
E. coli	AIG62486.1	ecoli_o132_aig62486.1	O132	399	12	-	-	-	WzyC	b	D-GlcpNAc	1,2	D-Galf
E. coli	AIG62394.1	ecoli_o133_aig62394.1	O133	385	11	-	TIGR04370	-	WzyB	a	D-GlcpNAc	1,3	L-Rhap
E. coli	BAQ01687.1	ecoli_o134_baq01687.1	O134	379	12	-	-	-	WzyC	b	D-GalpNAc	1,4	D-GlcpA6LThr
E. coli	ACD37173.1	ecoli_o135_acd37173.1	O135	382	12	-	-	-	WzyC	b	D-GlcpNAc	1,2	L-Rhap
E. coli	AIG62419.1	ecoli_o136_aig62419.1	O136	410	12	IPR007016	-	PTHR37422	WzyC	b	D-GlcpNAc	1,4	Pse5Ac7Ac
E. coli	AIG62424.1	ecoli_o137_aig62424.1	O137	408	12	IPR049504	-	-	WzyC	b	D-GlcpNAc	1,6	D-GlcpNAc
E. coli	AAZ85713.1	ecoli_o138_aaz85713.1	O138	403	12	IPR007016	-	PTHR37422	WzyC	b	D-GlcpNAc	1,2	L-Rhap
E. coli	AIG62435.1	ecoli_o139_aig62435.1	O139	412	11	-	TIGR04370	-	WzyB	a	D-GlcpNAc	1,3	L-Rhap
E. coli	AIG62480.1	ecoli_o140_aig62480.1	O140	396	13	IPR049458	-	-	WzyA	b	D-GalpNAc	1,3	D-Galp
E. coli	ABI98976.1	ecoli_o141_abi98976.1	O141	368	12	IPR049458	-	-	WzyA	b	D-GlcpNAc	1,4	D-Manp
E. coli	AGN91838.1	ecoli_o142_agn91838.1	O142	392	11	-	TIGR04370	-	WzyB	a	D-GalpNAc	1,2	L-Rhap
E. coli	ACA24764.1	ecoli_o143_aca24764.1	O143	360	10	-	-	-	WzyC	b	D-GlcpNAc	1,2	D-GalpA3Ac
E. coli	AIG62452.1	ecoli_o144_aig62452.1	O144	402	13	IPR049458	-	-	WzyA	-	-	-	-
E. coli	AAX58762.1	ecoli_o145_aax58762.1	O145	395	12	-	-	-	WzyC	b	D-GlcpNAc	1,4	Neu5Ac
E. coli	ABE98437.1	ecoli_o146_abe98437.1	O146	392	12	-	-	-	WzyC	b	D-GalpNAc	1,2	L-Rhap
E. coli	ABI98986.1	ecoli_o147_abi98986.1	O147	395	12	-	-	-	WzyC	b	D-GalpNAc	1,2	L-Rhap
E. coli	ABA42232.1	ecoli_o148_aba42232.1	O148	380	11	-	TIGR04370	-	WzyB	a	D-GlcpNAc	1,3	L-Rhap
E. coli	AAZ65837.1	ecoli_o149_aaz65837.1	O149	354	12	IPR049458	-	-	WzyA	b	D-GlcpNAc	1,3	D-GlcpNAc
E. coli	AAV74543.1	ecoli_o15_aav74543.1	O15	392	12	-	-	-	WzyC	b	D-GlcpNAc	1,2	D-Galp
E. coli	ACA24803.1	ecoli_o150_aca24803.1	O150	365	12	IPR049458	-	-	WzyA	b	D-GlcpNAc	1,3	D-GlcpNAc
E. coli	ADQ37322.1	ecoli_o151_adq37322.1	O151	366	12	IPR049458	-	-	WzyA	b	D-GlcpNAc	1,2	D-Ribitol
E. coli	ACA24821.1	ecoli_o152_aca24821.1	O152	357	12	IPR049458	-	-	WzyA	b	D-GlcpNAc	1,3	D-GlcpNAc
E. coli	BAQ01759.1	ecoli_o153_baq01759.1	O153	357	12	-	-	-	WzyC	a	D-GlcpNAc	1,2	D-Ribf
E. coli	BAQ01780.1	ecoli_o154_baq01780.1	O154	346	10	-	-	-	WzyB	a	D-GalpNAc	1,2	L-Rhap
E. coli	AAV74550.1	ecoli_o155_aav74550.1	O155	317	11	IPR049458	-	-	WzyA	b	D-GalpNAc	1,3	D-Galp
E. coli	AIG62555.1	ecoli_o156_aig62555.1	O156	401	12	-	-	-	WzyC	b	D-GlcpNAc	1,4	L-Fucp
E. coli	AAC32340.1	ecoli_o157_aac32340.1	O157	394	10	-	TIGR04370	-	WzyB	a	D-GalpNAc	1,2	D-Rhap4NAc
E. coli	ADN43871.1	ecoli_o158_adn43871.1	O158	383	12	-	-	-	WzyC	b	D-GlcpNAc	1,4	D-ManpNAc
E. coli	ACA24890.1	ecoli_o159_aca24890.1	O159	337	10	-	-	-	WzyA	b	D-GlcpNAc	1,3	D-GlcpNAc
E. coli	BAQ00653.1	ecoli_o16_baq00653.1	O16	388	11	-	TIGR04370	-	WzyB	a	D-GlcpNAc	1,2	D-Galf
E. coli	BAQ01812.1	ecoli_o160_baq01812.1	O160	366	12	-	-	-	WzyC	b	D-GalpNAc	1,4	D-GlcpNAc
E. coli	ADJ19203.1	ecoli_o161_adj19203.1	O161	395	12	-	-	-	WzyC	b	D-GlcpNAc	1,8	Leg5Ac7DAla
E. coli	AJR19405.1	ecoli_o163_ajr19405.1	O163	411	10	-	NF033860	-	WzyB	a	D-GlcpNAc	1,2	D-Manp
E. coli	ACD37146.1	ecoli_o164_acd37146.1	O164	367	12	IPR049458	-	-	WzyA	b	D-GalpNAc	1,3	D-Galp
E. coli	ADN43883.1	ecoli_o165_adn43883.1	O165	445	12	IPR046303	-	-	WzyB	a	D-GlcpNAc	1,8	Pse5R7Ac
E. coli	ADC54957.1	ecoli_o166_adc54957.1	O166	357	12	IPR049458	-	-	WzyA	b	D-GalpNAc	1,3	D-Galp
E. coli	ACD37046.1	ecoli_o167_acd37046.1	O167	416	12	-	-	-	WzyC	b	D-GlcpNAc	1,2	D-GalpA6NLAla
E. coli	ACD36996.1	ecoli_o168_acd36996.1	O168	410	12	IPR007016	-	PTHR37422	WzyC	b	D-GlcpNAc	1,4	D-GlcpNAc6Ac
E. coli	AIG62720.1	ecoli_o169_aig62720.1	O169	350	12	IPR049458	-	-	WzyA	b	D-GalpNAc	1,3	D-Galp
E. coli	BAQ02105.1	ecoli_o17_baq02105.1	O17	443	12	-	-	-	WzyB	a	D-GlcpNAc	1,6	D-Manp
E. coli	AIG62733.1	ecoli_o170_aig62733.1	O170	390	12	-	-	-	WzyC	b	D-GlcpNAc	1,4	D-GlcpNAc
E. coli	AIG56920.2	ecoli_o171_aig56920.2	O171	383	12	-	-	-	WzyC	b	D-GalpNAc	1,4	Neu5Ac7Ac9Ac
E. coli	AAT28922.1	ecoli_o172_aat28922.1	O172	391	10	-	NF033860	-	WzyB	a	D-GlcpNAc	1,3	L-FucNAc
E. coli	ADN43894.1	ecoli_o173_adn43894.1	O173	359	12	IPR049458	-	-	WzyA	b	D-GlcpNAc	1,3	D-Glcp
E. coli	AAY28249.1	ecoli_o174_aay28249.1	O174	379	12	IPR007016	-	PTHR37422	WzyC	b	D-GlcpNAc	1,4	D-GlcpA
E. coli	AIG56909.1	ecoli_o175_aig56909.1	O175	376	12	-	-	-	WzyC	b	D-GalpNAc	1,2	D-Glcp
E. coli	AIG62743.1	ecoli_o176_aig62743.1	O176	443	12	-	-	-	WzyB	a	D-GalpNAc	1,4	D-Manp
E. coli	AAY28257.1	ecoli_o177_aay28257.1	O177	428	12	-	-	-	WzyC	b	D-GlcpNAc	1,2	L-Rhap
E. coli	AIG62747.1	ecoli_o178_aig62747.1	O178	365	12	-	-	-	WzyC	b	D-GalpNAc	1,4	D-GlcpNAc
E. coli	AIG62759.1	ecoli_o179_aig62759.1	O179	367	11	-	-	-	WzyC	b	D-GlcpNAc	1,4	D-GlcpA
E. coli	ADC54950.1	ecoli_o18_adc54950.1	O18	396	11	-	TIGR04370	-	WzyB	a	D-GlcpNAc	1,2	L-Rhap
E. coli	AFN02899.1	ecoli_o180_afn02899.1	O180	404	10	-	TIGR04370	-	WzyB	a	D-GlcpNAc	1,4	D-ManpNAc3NAcA
E. coli	AIG62769.1	ecoli_o181_aig62769.1	O181	416	13	-	-	-	WzyA	b	D-GlcpNAc	1,4	D-GalpNAc6Ac
E. coli	AIG62775.1	ecoli_o182_aig62775.1	O182	408	12	-	-	-	WzyC	b	D-GlcpNAc	1,4	D-GlcpNAc
E. coli	BAL03056.1	ecoli_o183_bal03056.1	O183	350	12	IPR049458	-	-	WzyA	b	D-GalpNAc	1,3	D-Galp
E. coli	BAQ02031.1	ecoli_o184_baq02031.1	O184	447	13	-	-	-	WzyC	a	D-GalpNAc	1,2	D-Fucp3NR
E. coli	BAQ02048.1	ecoli_o185_baq02048.1	O185	456	12	IPR029468	-	-	WzyB	a	D-GalpNAc	1,4	D-GalpNAc
E. coli	BAQ02068.1	ecoli_o186_baq02068.1	O186	416	10	-	NF033860	-	WzyB	a	D-GlcpNAc	1,3	D-Quip4NAlaR
E. coli	AIG56949.1	ecoli_o187_aig56949.1	O187	425	12	-	-	-	WzyC	b	D-GlcpNAc	1,2	D-Fucp3NAc
E. coli	BAQ00705.1	ecoli_o19_baq00705.1	O19ab	374	11	-	TIGR04370	-	WzyB	a	D-GlcpNAc	1,2	L-Rhap
E. coli	ACD75809.1	ecoli_o2_acd75809.1	O2	320	11	IPR049458	-	-	WzyA	b	D-GlcpNAc	1,3	L-Rhap
E. coli	ACH97162.1	ecoli_o21_ach97162.1	O21	360	12	IPR049458	-	-	WzyA	b	D-GalpNAc	1,3	D-Galp
E. coli	ABI34562.1	ecoli_o22_abi34562.1	O22	411	12	IPR007016	-	PTHR37422	WzyC	b	D-GalpNAc	1,6	D-Glcp
E. coli	AIG62571.1	ecoli_o23_aig62571.1	O23	341	12	IPR049458	-	-	WzyA	b	D-GlcpNAc	1,6	D-Glcp
E. coli	AIG62584.1	ecoli_o24_aig62584.1	O24	350	12	IPR049458	-	-	WzyA	b	D-GalpNAc	1,7	Neu5Ac
E. coli	ADI43263.1	ecoli_o25_adi43263.1	O25	353	10	-	-	-	WzyC	b	D-GlcpNAc	1,4	D-Glcp
E. coli	AAN60459.1	ecoli_o26_aan60459.1	O26	340	12	IPR049458	-	-	WzyA	b	D-GlcpNAc	1,3	L-Rhap
E. coli	ADI43271.1	ecoli_o27_adi43271.1	O27	410	11	IPR049458	-	-	WzyA	b	D-GalpNAc	1,4	D-Galp
E. coli	AJR19372.1	ecoli_o28ab_ajr19372.1	O28ab	413	10	-	NF033860	-	WzyB	a	D-GlcpNAc	1,3	D-Glcp
E. coli	ACA24852.1	ecoli_o29_aca24852.1	O29	387	12	IPR049458	-	-	WzyA	b	D-GlcpNAc	1,3	D-Gro
E. coli	ACH97152.1	ecoli_o3_ach97152.1	O3	361	12	IPR049458	-	-	WzyA	b	D-GlcpNAc	1,3	D-GlcpNAc
E. coli	AIG62591.1	ecoli_o30_aig62591.1	O30	408	12	-	-	-	WzyB	a	D-GlcpNAc	1,4	D-GlcpA
E. coli	ACD37058.1	ecoli_o32_acd37058.1	O32	403	12	-	-	-	WzyC	b	D-GlcpNAc	1,6	D-Galp
E. coli	AIG62598.1	ecoli_o33_aig62598.1	O33	400	12	-	-	-	WzyC	b	D-GalpNAc	1,2	D-Galp
E. coli	AIG62789.1	ecoli_o34_aig62789.1	O34	340	11	IPR049458	-	-	WzyA	-	-	-	-
E. coli	ACV67289.1	ecoli_o35_acv67289.1	O35	340	11	IPR049458	-	-	WzyA	b	D-GlcpNAc	1,3	L-Rhap
E. coli	BAQ00830.1	ecoli_o36_baq00830.1	O36	418	11	-	-	-	WzyB	b	D-GlcpNAc	1,4	D-Manp
E. coli	AIG62499.1	ecoli_o37_aig62499.1	O37	377	12	-	-	-	WzyC	b	D-GalpNAc	1,4	D-GalpNAc
E. coli	AJR19362.1	ecoli_o38_ajr19362.1	O38	408	13	IPR049458	-	-	WzyA	b	D-GalpNAc	1,6	D-GlcpNAc
E. coli	BAQ00879.1	ecoli_o39_baq00879.1	O39	415	10	-	NF033860	-	WzyB	a	D-GlcpNAc	1,3	D-Quip4NR
E. coli	AAT85653.1	ecoli_o4_aat85653.1	O4	395	12	IPR049458	-	-	WzyA	b	D-GlcpNAc	1,2	L-Rhap
E. coli	ACD37117.1	ecoli_o40_acd37117.1	O40	401	12	-	-	-	WzyC	b	D-GlcpNAc	1,2	D-Galp
E. coli	BAQ00893.1	ecoli_o41_baq00893.1	O41	398	13	IPR049458	-	-	WzyA	b	D-GlcpNAc	1,3	D-Galp
E. coli	BAQ00911.1	ecoli_o42_baq00911.1	O42	459	12	IPR029468	-	-	WzyB	a	D-GlcpNAc	1,2	D-Gro
E. coli	AIG62638.1	ecoli_o43_aig62638.1	O43	403	12	-	-	-	WzyC	b	D-GlcpNAc	1,4	D-Manp2Ac
E. coli	WP_000549530.1	ecoli_o44_wp_000549530.1	O44	443	12	-	-	-	WzyB	a	D-GlcpNAc	1,6	D-Manp
E. coli	AAX07747.1	ecoli_o45_aax07747.1	O45	382	10	-	TIGR04370	-	WzyB	a	D-FucpNAc	1,2	D-Glcp
E. coli	BAQ00957.1	ecoli_o46_baq00957.1	O46	379	12	-	-	-	WzyC	b	D-GalpNAc	1,4	D-GlcpA6LThr3Ac
E. coli	AIG62384.1	ecoli_o48_aig62384.1	O48	373	12	IPR007016	-	-	WzyC	b	D-GlcpNAc	1,4	D-GalpNAc
E. coli	BAQ00994.1	ecoli_o49_baq00994.1	O49	384	12	-	-	-	WzyC	b	D-GlcpNAc	1,2	D-Quip4NR
E. coli	BAQ01012.1	ecoli_o50_baq01012.1	O50	320	11	IPR049458	-	-	WzyA	b	D-GlcpNAc	1,3	L-Rhap
E. coli	BAQ01024.1	ecoli_o51_baq01024.1	O51	345	12	IPR049458	-	-	WzyA	b	D-GalpNAc	1,3	L-Rhap
E. coli	ABZ79721.1	ecoli_o53_abz79721.1	O53	430	12	IPR007016	-	-	WzyC	b	D-GlcpNAc	1,3	L-Rhap
E. coli	BAQ02116.1	ecoli_o54_baq02116.1	O54	352	12	IPR049458	-	-	WzyA	b	D-GlcpNAc	1,4	D-GalpA
E. coli	AAL67557.1	ecoli_o55_aal67557.1	O55	325	11	-	-	-	WzyA	b	D-GalpNAc	1,6	D-GlcpNAc
E. coli	ABB29916.1	ecoli_o56_abb29916.1	O56	349	12	IPR049458	-	-	WzyA	b	D-GlcpNAc	1,7	Neu5Ac
E. coli	ACA24882.1	ecoli_o56_aca24882.1	O58	443	12	-	-	-	WzyC	b	D-GlcpNAc	1,4	D-Manp
E. coli	AAV74376.1	ecoli_o59_aav74376.1	O59	389	10	-	NF033860	-	WzyB	a	D-GlcpNAc	1,6	D-Manp
E. coli	AJR19356.1	ecoli_o5ab_ajr19356.1	O5ab	438	11	-	TIGR04370	-	WzyB	a	D-GalpNAc	1,4	D-Quip3NAc
E. coli	CAD19991.1	ecoli_o6_cad19991.1	O6	447	12	IPR029468	TIGR04370	-	WzyB	a	D-GlcpNAc	1,4	D-GalpNAc
E. coli	ADJ19217.1	ecoli_o61_adj19217.1	O61	385	11	-	-	-	WzyB	a	D-GalpNAc	1,4	8eLeg5Ac7Ac8Ac
E. coli	AGN91809.1	ecoli_o62_agn91809.1	O62	372	10	-	-	-	WzyB	-	-	-	-
E. coli	ACD75796.1	ecoli_o63_acd75796.1	O63	436	11	-	-	-	WzyB	a	D-GlcpNAc	1,2	D-Quip3NDalloThrAc
E. coli	BAQ01114.1	ecoli_o64_baq01114.1	O64	409	12	IPR007016	-	PTHR37422	WzyC	b	D-GlcpNAc	1,3	D-ManpNAc
E. coli	AJR19392.1	ecoli_o65_ajr19392.1	O65	423	11	-	TIGR04370	-	WzyB	a	D-GlcpNAc	1,2	D-Quip3NAc
E. coli	AAZ20761.1	ecoli_o66_aaz20761.1	O66	420	10	-	NF033860	-	WzyB	a	D-GlcpNAc	1,2	D-Glcp3Ac
E. coli	AIT92164.1	ecoli_o68_ait92164.1	O68	372	10	-	-	-	WzyB	a	D-GlcpNAc	1,6	D-Manp
E. coli	AIG62798.1	ecoli_o69_aig62798.1	O69	371	12	IPR049458	-	-	WzyA	a	D-GlcpNAc	1,3	D-GlcpNAc4RLac6Ac
E. coli	AAD44158.1	ecoli_o7_aad44158.1	O7	383	10	-	NF033860	-	WzyB	a	D-GlcpNAc	1,3	D-Quip4NAc
E. coli	CBN82200.1	ecoli_o70_cbn82200.1	O70	426	11	-	-	-	WzyB	a	D-GalpNAc	1,4	D-Quip3NAc
E. coli	ADI77033.1	ecoli_o71_adi77033.1	O71	429	11	-	-	-	WzyB	a	D-GalpNAc	1,4	D-Quip3NAc
E. coli	AAY23733.1	ecoli_o73_aay23733.1	O73	443	12	-	-	-	WzyB	a	D-GlcpNAc	1,6	D-Manp
E. coli	BAQ01207.1	ecoli_o74_baq01207.1	O74	391	12	-	-	-	WzyC	b	D-GlcpNAc	1,6	D-GlcpNAc
E. coli	AIG62607.1	ecoli_o75_aig62607.1	O75	357	12	IPR049458	-	-	WzyA	b	D-GlcpNAc	1,3	D-Galp
E. coli	BAQ01218.1	ecoli_o76_baq01218.1	O76	410	12	IPR007016	-	-	WzyC	b	D-GalpNAc	1,4	D-GlcpA
E. coli	AAY23739.1	ecoli_o77_aay23739.1	O77	443	12	-	-	-	WzyB	a	D-GlcpNAc	1,6	D-Manp
E. coli	AIG62619.1	ecoli_o78_aig62619.1	O78	373	12	IPR049458	-	-	WzyA	b	D-GlcpNAc	1,4	D-GlcpNAc
E. coli	AIG62648.1	ecoli_o79_aig62648.1	O79	363	10	-	-	-	WzyB	a	D-GlcpNAc	1,2	D-Galp
E. coli	BAQ00597.1	ecoli_o8_baq00597.1	O8	416	12	-	-	-	WzyC	-	-	-	-
E. coli	BAQ01238.1	ecoli_o80_baq01238.1	O80	408	12	-	-	-	WzyC	b	D-GlcpNAc	1,6	D-Glcp
E. coli	AIG62868.1	ecoli_o81_aig62868.1	O81	409	13	IPR049458	-	-	WzyA	b	D-GalpNAc	1,6	D-GalpNAc
E. coli	BAQ01266.1	ecoli_o82_baq01266.1	O82	360	12	-	-	-	WzyC	b	D-GlcpNAc	1,4	D-Glcp
E. coli	AIG62838.1	ecoli_o83_aig62838.1	O83	411	12	-	-	-	WzyC	b	D-GlcpNAc	1,6	D-Glcp
E. coli	AJE24489.1	ecoli_o84_aje24489.1	O84	383	12	IPR049458	-	-	WzyA	b	D-GlcpNAc	1,2	L-Fucp
E. coli	AIG62657.1	ecoli_o85_aig62657.1	O85	372	12	-	-	-	WzyC	b	D-GlcpNAc	1,2	D-Galp
E. coli	AAO37717.1	ecoli_o86_b7_aao37717.1	O86:B7	466	12	-	-	-	WzyB	a	D-GalpNAc	1,2	D-Galp
E. coli	ACA24901.1	ecoli_o87_aca24901.1	O87	384	12	IPR049458	-	-	WzyA	b	D-GalpNAc	1,3	D-Galf
E. coli	AIG62878.1	ecoli_o88_aig62878.1	O88	424	12	-	-	-	WzyC	b	D-GlcpNAc	1,4	D-Manp
E. coli	BAQ01361.1	ecoli_o90_baq01361.1	O90	385	10	-	-	-	WzyB	a	D-GalpNAc	1,3	D-GalpNAc
E. coli	AAK60458.1	ecoli_o91_aak60458.1	O91	403	12	-	-	-	WzyC	b	D-GlcpNAc	1,4	D-Quip3NR
E. coli	BAQ01386.1	ecoli_o93_baq01386.1	O93	503	14	-	-	-	WzyC	-	-	-	-
E. coli	AIG62627.1	ecoli_o96_aig62627.1	O96	416	12	-	-	-	WzyC	b	D-GlcpNAc	1,2	D-GlcpA
E. coli	ABB04486.1	ecoli_o98_abb04486.1	O98	384	10	-	-	-	WzyA	b	D-GlcpNAc	1,3	L-QuipNAc
E. coli	BAU71558.1	ecoli_ogn1_bau71558.1	OgN1	416	12	-	-	-	WzyC	-	-	-	-
E. coli	BAU71608.1	ecoli_ogn10_bau71608.1	OgN10	339	9	IPR049458	-	-	WzyA	-	-	-	-
E. coli	BAU71625.1	ecoli_ogn12_bau71625.1	OgN12	353	12	IPR049458	-	-	WzyA	-	-	-	-
E. coli	BAV90482.1	ecoli_ogn13_bav90482.1	OgN13	355	12	IPR049458	-	-	WzyA	-	-	-	-
E. coli	BAV90498.1	ecoli_ogn14_bav90498.1	OgN14	384	12	IPR049458	-	-	WzyA	-	-	-	-
E. coli	BAV90511.1	ecoli_ogn15_bav90511.1	OgN15	413	11	IPR010691	-	-	WzyB	-	-	-	-
E. coli	BAV90529.1	ecoli_ogn16_bav90529.1	OgN16	406	11	IPR045918	-	-	WzyB	-	-	-	-
E. coli	BAV90548.1	ecoli_ogn17_bav90548.1	OgN17	438	12	-	-	-	WzyC	-	-	-	-
E. coli	BAV90417.1	ecoli_ogn2_bav90417.1	OgN2	337	12	IPR049458	-	-	WzyA	-	-	-	-
E. coli	BAV90433.1	ecoli_ogn3_bav90433.1	OgN3	392	10	-	TIGR04370	-	WzyB	-	-	-	-
E. coli	BAU71639.1	ecoli_ogn31_bau71639.1	OgN31	402	10	-	NF033860	-	WzyB	-	-	-	-
E. coli	BAV90441.1	ecoli_ogn4_bav90441.1	OgN4	462	14	-	-	-	WzyC	-	-	-	-
E. coli	BAU71572.1	ecoli_ogn8_bau71572.1	OgN8	389	9	-	-	-	WzyC	-	-	-	-
E. coli	BAU71586.1	ecoli_ogn9_bau71586.1	OgN9	392	10	-	NF033860	-	WzyB	-	-	-	-
E. coli	AJR19385.1	ecoli_ox13_ajr19385.1	OX13	387	9	-	-	-	WzyC	-	-	-	-
E. coli	AIG62370.1	ecoli_ox18_aig62370.1	OX18	396	12	-	-	-	WzyC	-	-	-	-
E. coli	AJR19416.1	ecoli_ox25_ajr19416.1	OX25	349	12	IPR049458	-	-	WzyA	-	-	-	-
E. coli	BAV90458.1	ecoli_ogn5_bav90458.1	OgN5	395	10	IPR007016	-	-	WzyC	-	-	-	-
Klebsiella spp.	Klebsiella_k_locus_primary_reference (https://github.com/klebgenomics/Kaptive)	klebsiella_kl1_09	KL1	408	13	IPR007016	-	PTHR37422	WzyC	b	D-Glcp	1,4	D-GlcpA
Klebsiella spp.	Klebsiella_k_locus_primary_reference (https://github.com/klebgenomics/Kaptive)	klebsiella_kl10_14	KL10	405	12	IPR007016	-	PTHR37422	WzyC	b	D-Galp	1,6	D-Glcp
Klebsiella spp.	Klebsiella_k_locus_primary_reference (https://github.com/klebgenomics/Kaptive)	klebsiella_kl101_12	KL101	390	12	IPR049458	-	-	WzyA	-	-	-	-
Klebsiella spp.	Klebsiella_k_locus_primary_reference (https://github.com/klebgenomics/Kaptive)	klebsiella_kl102_08	KL102	432	11	IPR049458	-	-	WzyA	-	-	-	-
Klebsiella spp.	Klebsiella_k_locus_primary_reference (https://github.com/klebgenomics/Kaptive)	klebsiella_kl103_12	KL103	409	13	IPR049458	-	-	WzyA	-	-	-	-
Klebsiella spp.	Klebsiella_k_locus_primary_reference (https://github.com/klebgenomics/Kaptive)	klebsiella_kl104_12	KL104	420	12	-	-	-	WzyC	-	-	-	-
Klebsiella spp.	Klebsiella_k_locus_primary_reference (https://github.com/klebgenomics/Kaptive)	klebsiella_kl105_13	KL105	394	12	-	-	-	WzyC	-	-	-	-
Klebsiella spp.	Klebsiella_k_locus_primary_reference (https://github.com/klebgenomics/Kaptive)	klebsiella_kl106_07	KL106	381	12	-	-	-	WzyC	b	D-Glcp	1,3	D-Galp
Klebsiella spp.	Klebsiella_k_locus_primary_reference (https://github.com/klebgenomics/Kaptive)	klebsiella_kl108_11	KL108	400	12	-	-	-	WzyC	-	-	-	-
Klebsiella spp.	Klebsiella_k_locus_primary_reference (https://github.com/klebgenomics/Kaptive)	klebsiella_kl109_12	KL109	394	12	-	-	-	WzyC	-	-	-	-
Klebsiella spp.	Klebsiella_k_locus_primary_reference (https://github.com/klebgenomics/Kaptive)	klebsiella_kl11_08	KL11	349	10	IPR049458	-	-	WzyA	b	D-Glcp	1,3	D-GlcpA
Klebsiella spp.	Klebsiella_k_locus_primary_reference (https://github.com/klebgenomics/Kaptive)	klebsiella_kl110_09	KL110	321	10	IPR049458	-	-	WzyA	-	-	-	-
Klebsiella spp.	Klebsiella_k_locus_primary_reference (https://github.com/klebgenomics/Kaptive)	klebsiella_kl111_07	KL111	384	12	-	-	-	WzyC	-	-	-	-
Klebsiella spp.	Klebsiella_k_locus_primary_reference (https://github.com/klebgenomics/Kaptive)	klebsiella_kl112_09	KL112	402	12	IPR007016	-	PTHR37422	WzyC	-	-	-	-
Klebsiella spp.	Klebsiella_k_locus_primary_reference (https://github.com/klebgenomics/Kaptive)	klebsiella_kl114_08	KL114	422	11	-	TIGR04370	-	WzyB	-	-	-	-
Klebsiella spp.	Klebsiella_k_locus_primary_reference (https://github.com/klebgenomics/Kaptive)	klebsiella_kl115_10	KL115	335	11	IPR049458	-	-	WzyA	-	-	-	-
Klebsiella spp.	Klebsiella_k_locus_primary_reference (https://github.com/klebgenomics/Kaptive)	klebsiella_kl116_09	KL116	330	10	IPR049458	-	-	WzyA	-	-	-	-
Klebsiella spp.	Klebsiella_k_locus_primary_reference (https://github.com/klebgenomics/Kaptive)	klebsiella_kl117_11	KL117	394	12	IPR007016	-	-	WzyC	-	-	-	-
Klebsiella spp.	Klebsiella_k_locus_primary_reference (https://github.com/klebgenomics/Kaptive)	klebsiella_kl118_09	KL118	377	12	IPR049458	-	-	WzyA	-	-	-	-
Klebsiella spp.	Klebsiella_k_locus_primary_reference (https://github.com/klebgenomics/Kaptive)	klebsiella_kl119_07	KL119	440	12	-	-	-	WzyC	-	-	-	-
Klebsiella spp.	Klebsiella_k_locus_primary_reference (https://github.com/klebgenomics/Kaptive)	klebsiella_kl12_12	KL12	395	10	-	-	-	WzyB	a	D-Galp	1,2	D-Galf
Klebsiella spp.	Klebsiella_k_locus_primary_reference (https://github.com/klebgenomics/Kaptive)	klebsiella_kl120_13	KL120	398	12	IPR049458	-	-	WzyA	-	-	-	-
Klebsiella spp.	Klebsiella_k_locus_primary_reference (https://github.com/klebgenomics/Kaptive)	klebsiella_kl121_09	KL121	443	12	IPR007016	-	PTHR37422	WzyC	-	-	-	-
Klebsiella spp.	Klebsiella_k_locus_primary_reference (https://github.com/klebgenomics/Kaptive)	klebsiella_kl122_07	KL122	407	12	-	-	-	WzyC	-	-	-	-
Klebsiella spp.	Klebsiella_k_locus_primary_reference (https://github.com/klebgenomics/Kaptive)	klebsiella_kl123_09	KL123	347	12	IPR049458	-	-	WzyA	-	-	-	-
Klebsiella spp.	Klebsiella_k_locus_primary_reference (https://github.com/klebgenomics/Kaptive)	klebsiella_kl124_11	KL124	386	12	IPR049458	-	-	WzyA	-	-	-	-
Klebsiella spp.	Klebsiella_k_locus_primary_reference (https://github.com/klebgenomics/Kaptive)	klebsiella_kl125_09	KL125	422	12	-	-	-	WzyA	-	-	-	-
Klebsiella spp.	Klebsiella_k_locus_primary_reference (https://github.com/klebgenomics/Kaptive)	klebsiella_kl127_09	KL127	426	11	-	-	-	WzyB	-	-	-	-
Klebsiella spp.	Klebsiella_k_locus_primary_reference (https://github.com/klebgenomics/Kaptive)	klebsiella_kl128_09	KL128	391	10	-	TIGR04370	-	WzyB	-	-	-	-
Klebsiella spp.	Klebsiella_k_locus_primary_reference (https://github.com/klebgenomics/Kaptive)	klebsiella_kl13_09	KL13	418	12	-	-	-	WzyC	b	D-Glcp	1,4	D-Manp
Klebsiella spp.	Klebsiella_k_locus_primary_reference (https://github.com/klebgenomics/Kaptive)	klebsiella_kl130_08	KL130	424	12	IPR007016	-	PTHR37422	WzyC	-	-	-	-
Klebsiella spp.	Klebsiella_k_locus_primary_reference (https://github.com/klebgenomics/Kaptive)	klebsiella_kl131_17	KL131	337	11	IPR049458	-	-	WzyA	-	-	-	-
Klebsiella spp.	Klebsiella_k_locus_primary_reference (https://github.com/klebgenomics/Kaptive)	klebsiella_kl132_07	KL132	410	12	IPR007016	-	PTHR37422	WzyC	-	-	-	-
Klebsiella spp.	Klebsiella_k_locus_primary_reference (https://github.com/klebgenomics/Kaptive)	klebsiella_kl133_07	KL133	430	12	-	-	-	WzyC	-	-	-	-
Klebsiella spp.	Klebsiella_k_locus_primary_reference (https://github.com/klebgenomics/Kaptive)	klebsiella_kl134_10	KL134	373	10	-	-	-	WzyA	-	-	-	-
Klebsiella spp.	Klebsiella_k_locus_primary_reference (https://github.com/klebgenomics/Kaptive)	klebsiella_kl135_13	KL135	377	12	IPR049458	-	-	WzyA	-	-	-	-
Klebsiella spp.	Klebsiella_k_locus_primary_reference (https://github.com/klebgenomics/Kaptive)	klebsiella_kl136_07	KL136	414	13	IPR049458	-	-	WzyA	-	-	-	-
Klebsiella spp.	Klebsiella_k_locus_primary_reference (https://github.com/klebgenomics/Kaptive)	klebsiella_kl137_15	KL137	327	11	IPR049458	-	-	WzyA	-	-	-	-
Klebsiella spp.	Klebsiella_k_locus_primary_reference (https://github.com/klebgenomics/Kaptive)	klebsiella_kl138_09	KL138	399	13	IPR049458	-	-	WzyA	-	-	-	-
Klebsiella spp.	Klebsiella_k_locus_primary_reference (https://github.com/klebgenomics/Kaptive)	klebsiella_kl139_07	KL139	399	13	IPR049458	-	-	WzyA	-	-	-	-
Klebsiella spp.	Klebsiella_k_locus_primary_reference (https://github.com/klebgenomics/Kaptive)	klebsiella_kl14_11	KL14	402	12	-	-	-	WzyC	b	D-Glcp	1,4	D-Manp
Klebsiella spp.	Klebsiella_k_locus_primary_reference (https://github.com/klebgenomics/Kaptive)	klebsiella_kl140_07	KL140	400	13	IPR049458	-	-	WzyA	-	-	-	-
Klebsiella spp.	Klebsiella_k_locus_primary_reference (https://github.com/klebgenomics/Kaptive)	klebsiella_kl141_11	KL141	399	12	-	-	-	WzyC	-	-	-	-
Klebsiella spp.	Klebsiella_k_locus_primary_reference (https://github.com/klebgenomics/Kaptive)	klebsiella_kl142_11	KL142	370	12	-	-	-	WzyC	-	-	-	-
Klebsiella spp.	Klebsiella_k_locus_primary_reference (https://github.com/klebgenomics/Kaptive)	klebsiella_kl143_09	KL143	403	12	-	-	-	WzyC	-	-	-	-
Klebsiella spp.	Klebsiella_k_locus_primary_reference (https://github.com/klebgenomics/Kaptive)	klebsiella_kl144_09	KL144	405	12	-	-	-	WzyC	-	-	-	-
Klebsiella spp.	Klebsiella_k_locus_primary_reference (https://github.com/klebgenomics/Kaptive)	klebsiella_kl145_13	KL145	386	12	IPR049458	-	-	WzyA	-	-	-	-
Klebsiella spp.	Klebsiella_k_locus_primary_reference (https://github.com/klebgenomics/Kaptive)	klebsiella_kl146_07	KL146	397	12	-	-	-	WzyC	-	-	-	-
Klebsiella spp.	Klebsiella_k_locus_primary_reference (https://github.com/klebgenomics/Kaptive)	klebsiella_kl147_09	KL147	402	12	IPR007016	-	PTHR37422	WzyC	-	-	-	-
Klebsiella spp.	Klebsiella_k_locus_primary_reference (https://github.com/klebgenomics/Kaptive)	klebsiella_kl149_14	KL149	373	12	IPR049458	-	-	WzyA	-	-	-	-
Klebsiella spp.	Klebsiella_k_locus_primary_reference (https://github.com/klebgenomics/Kaptive)	klebsiella_kl15_12	KL15	411	13	IPR049458	-	-	WzyA	b	D-Galp	1,?	D-Galp
Klebsiella spp.	Klebsiella_k_locus_primary_reference (https://github.com/klebgenomics/Kaptive)	klebsiella_kl150_08	KL150	365	12	-	-	-	WzyC	-	-	-	-
Klebsiella spp.	Klebsiella_k_locus_primary_reference (https://github.com/klebgenomics/Kaptive)	klebsiella_kl151_11	KL151	393	11	-	-	-	WzyB	-	-	-	-
Klebsiella spp.	Klebsiella_k_locus_primary_reference (https://github.com/klebgenomics/Kaptive)	klebsiella_kl152_08	KL152	425	13	IPR049458	-	-	WzyA	-	-	-	-
Klebsiella spp.	Klebsiella_k_locus_primary_reference (https://github.com/klebgenomics/Kaptive)	klebsiella_kl153_07	KL153	424	13	-	-	-	WzyC	-	-	-	-
Klebsiella spp.	Klebsiella_k_locus_primary_reference (https://github.com/klebgenomics/Kaptive)	klebsiella_kl154_07	KL154	397	12	-	-	-	WzyC	-	-	-	-
Klebsiella spp.	Klebsiella_k_locus_primary_reference (https://github.com/klebgenomics/Kaptive)	klebsiella_kl155_13	KL155	423	10	-	-	-	WzyB	-	-	-	-
Klebsiella spp.	Klebsiella_k_locus_primary_reference (https://github.com/klebgenomics/Kaptive)	klebsiella_kl156-d1_09	KL156-D1	382	12	-	-	-	WzyC	-	-	-	-
Klebsiella spp.	Klebsiella_k_locus_primary_reference (https://github.com/klebgenomics/Kaptive)	klebsiella_kl157_11	KL157	396	12	-	-	-	WzyC	-	-	-	-
Klebsiella spp.	Klebsiella_k_locus_primary_reference (https://github.com/klebgenomics/Kaptive)	klebsiella_kl158_09	KL158	404	13	IPR049458	-	-	WzyA	-	-	-	-
Klebsiella spp.	Klebsiella_k_locus_primary_reference (https://github.com/klebgenomics/Kaptive)	klebsiella_kl159_11	KL159	396	10	IPR002760	-	-	WzyB	-	-	-	-
Klebsiella spp.	Klebsiella_k_locus_primary_reference (https://github.com/klebgenomics/Kaptive)	klebsiella_kl16_08	KL16	436	11	-	-	-	WzyB	a	D-Glcp	1,4	D-GlcpA
Klebsiella spp.	Klebsiella_k_locus_primary_reference (https://github.com/klebgenomics/Kaptive)	klebsiella_kl160_07	KL160	410	12	IPR007016	-	PTHR37422	WzyC	-	-	-	-
Klebsiella spp.	Klebsiella_k_locus_primary_reference (https://github.com/klebgenomics/Kaptive)	klebsiella_kl162_11	KL162	392	10	-	TIGR04370	-	WzyB	-	-	-	-
Klebsiella spp.	Klebsiella_k_locus_primary_reference (https://github.com/klebgenomics/Kaptive)	klebsiella_kl163_08	KL163	407	12	-	-	-	WzyC	-	-	-	-
Klebsiella spp.	Klebsiella_k_locus_primary_reference (https://github.com/klebgenomics/Kaptive)	klebsiella_kl164_10	KL164	288	10	IPR049458	-	-	WzyA	-	-	-	-
Klebsiella spp.	Klebsiella_k_locus_primary_reference (https://github.com/klebgenomics/Kaptive)	klebsiella_kl165_08	KL165	350	12	IPR049458	-	-	WzyA	-	-	-	-
Klebsiella spp.	Klebsiella_k_locus_primary_reference (https://github.com/klebgenomics/Kaptive)	klebsiella_kl166_09	KL166	402	13	IPR049458	-	-	WzyA	-	-	-	-
Klebsiella spp.	Klebsiella_k_locus_primary_reference (https://github.com/klebgenomics/Kaptive)	klebsiella_kl167_07	KL167	390	11	-	-	-	WzyC	-	-	-	-
Klebsiella spp.	Klebsiella_k_locus_primary_reference (https://github.com/klebgenomics/Kaptive)	klebsiella_kl168_14	KL168	402	12	IPR007016	-	-	WzyC	-	-	-	-
Klebsiella spp.	Klebsiella_k_locus_primary_reference (https://github.com/klebgenomics/Kaptive)	klebsiella_kl169_11	KL169	390	10	-	-	-	WzyB	-	-	-	-
Klebsiella spp.	Klebsiella_k_locus_primary_reference (https://github.com/klebgenomics/Kaptive)	klebsiella_kl17_07	KL17	443	13	-	-	-	WzyC	b	D-Glcp	1,2	L-Rhap
Klebsiella spp.	Klebsiella_k_locus_primary_reference (https://github.com/klebgenomics/Kaptive)	klebsiella_kl170_12	KL170	390	12	IPR049458	-	-	WzyA	-	-	-	-
Klebsiella spp.	Klebsiella_k_locus_primary_reference (https://github.com/klebgenomics/Kaptive)	klebsiella_kl171_07	KL171	381	12	-	-	-	WzyC	-	-	-	-
Klebsiella spp.	Klebsiella_k_locus_primary_reference (https://github.com/klebgenomics/Kaptive)	klebsiella_kl172_21	KL172	384	13	IPR049458	-	-	WzyA	-	-	-	-
Klebsiella spp.	Klebsiella_k_locus_primary_reference (https://github.com/klebgenomics/Kaptive)	klebsiella_kl173_07	KL173	338	10	-	-	-	WzyC	-	-	-	-
Klebsiella spp.	Klebsiella_k_locus_primary_reference (https://github.com/klebgenomics/Kaptive)	klebsiella_kl174_07	KL174	422	12	-	-	-	WzyC	-	-	-	-
Klebsiella spp.	Klebsiella_k_locus_primary_reference (https://github.com/klebgenomics/Kaptive)	klebsiella_kl175_12	KL175	397	13	IPR049458	-	-	WzyA	-	-	-	-
Klebsiella spp.	Klebsiella_k_locus_primary_reference (https://github.com/klebgenomics/Kaptive)	klebsiella_kl176_11	KL176	353	10	-	-	-	WzyA	-	-	-	-
Klebsiella spp.	Klebsiella_k_locus_primary_reference (https://github.com/klebgenomics/Kaptive)	klebsiella_kl177_07	KL177	411	12	-	-	-	WzyC	-	-	-	-
Klebsiella spp.	Klebsiella_k_locus_primary_reference (https://github.com/klebgenomics/Kaptive)	klebsiella_kl178_07	KL178	409	12	-	-	-	WzyC	-	-	-	-
Klebsiella spp.	Klebsiella_k_locus_primary_reference (https://github.com/klebgenomics/Kaptive)	klebsiella_kl179_08	KL179	406	13	IPR049458	-	-	WzyA	-	-	-	-
Klebsiella spp.	Klebsiella_k_locus_primary_reference (https://github.com/klebgenomics/Kaptive)	klebsiella_kl18_12	KL18	402	12	-	-	-	WzyC	b	D-Galp	1,4	D-Glcp
Klebsiella spp.	Klebsiella_k_locus_primary_reference (https://github.com/klebgenomics/Kaptive)	klebsiella_kl180_09	KL180	320	11	IPR049458	-	-	WzyA	-	-	-	-
Klebsiella spp.	Klebsiella_k_locus_primary_reference (https://github.com/klebgenomics/Kaptive)	klebsiella_kl181_10	KL181	323	11	IPR049458	-	-	WzyA	-	-	-	-
Klebsiella spp.	Klebsiella_k_locus_primary_reference (https://github.com/klebgenomics/Kaptive)	klebsiella_kl182_07	KL182	381	12	-	-	-	WzyC	-	-	-	-
Klebsiella spp.	Klebsiella_k_locus_primary_reference (https://github.com/klebgenomics/Kaptive)	klebsiella_kl183_12	KL183	340	11	IPR049458	-	-	WzyA	-	-	-	-
Klebsiella spp.	Klebsiella_k_locus_primary_reference (https://github.com/klebgenomics/Kaptive)	klebsiella_kl184_18	KL184	373	12	IPR049458	-	-	WzyA	-	-	-	-
Klebsiella spp.	Klebsiella_k_locus_primary_reference (https://github.com/klebgenomics/Kaptive)	klebsiella_kl185_12	KL185	409	13	IPR049458	-	-	WzyA	-	-	-	-
Klebsiella spp.	Klebsiella_k_locus_primary_reference (https://github.com/klebgenomics/Kaptive)	klebsiella_kl186_12	KL186	398	12	IPR007016	-	-	WzyC	-	-	-	-
Klebsiella spp.	Klebsiella_k_locus_primary_reference (https://github.com/klebgenomics/Kaptive)	klebsiella_kl19_13	KL19	346	11	IPR049458	-	-	WzyA	b	D-Galp	1,3	D-Glcp
Klebsiella spp.	Klebsiella_k_locus_primary_reference (https://github.com/klebgenomics/Kaptive)	klebsiella_kl2_10	KL2	429	12	-	-	-	WzyC	b	D-Glcp	1,4	D-Manp
Klebsiella spp.	Klebsiella_k_locus_primary_reference (https://github.com/klebgenomics/Kaptive)	klebsiella_kl20_08	KL20	410	12	IPR007016	-	PTHR37422	WzyC	b	D-Galp	1,2	D-Manp
Klebsiella spp.	Klebsiella_k_locus_primary_reference (https://github.com/klebgenomics/Kaptive)	klebsiella_kl21_08	KL21	407	12	-	-	-	WzyC	-	-	-	-
Klebsiella spp.	Klebsiella_k_locus_primary_reference (https://github.com/klebgenomics/Kaptive)	klebsiella_kl22_07	KL22	381	12	-	-	-	WzyC	b	D-Glcp	1,3	D-Galp
Klebsiella spp.	Klebsiella_k_locus_primary_reference (https://github.com/klebgenomics/Kaptive)	klebsiella_kl23_10	KL23	378	11	-	-	-	WzyA	b	D-Glcp	1,3	L-Rhap
Klebsiella spp.	Klebsiella_k_locus_primary_reference (https://github.com/klebgenomics/Kaptive)	klebsiella_kl24_09	KL24	410	12	-	-	-	WzyC	b	D-Glcp	1,2	D-GlcpA
Klebsiella spp.	Klebsiella_k_locus_primary_reference (https://github.com/klebgenomics/Kaptive)	klebsiella_kl25_08	KL25	379	12	-	-	-	WzyC	b	D-Glcp	1,3	D-Galp
Klebsiella spp.	Klebsiella_k_locus_primary_reference (https://github.com/klebgenomics/Kaptive)	klebsiella_kl26_07	KL26	406	12	-	-	-	WzyC	b	D-Galp	1,2	D-Glcp
Klebsiella spp.	Klebsiella_k_locus_primary_reference (https://github.com/klebgenomics/Kaptive)	klebsiella_kl27_11	KL27	413	13	IPR049458	-	-	WzyA	b	D-Galp	1,3	D-Galp
Klebsiella spp.	Klebsiella_k_locus_primary_reference (https://github.com/klebgenomics/Kaptive)	klebsiella_kl28_10	KL28	419	12	-	-	-	WzyC	b	D-Glcp	1,3	D-Galp
Klebsiella spp.	Klebsiella_k_locus_primary_reference (https://github.com/klebgenomics/Kaptive)	klebsiella_kl3_14	KL3	408	12	-	-	-	WzyC	b	D-Galp	1,2	D-GalpA
Klebsiella spp.	Klebsiella_k_locus_primary_reference (https://github.com/klebgenomics/Kaptive)	klebsiella_kl30_10	KL30	437	12	-	-	-	WzyC	b	D-Glcp	1,4	D-Manp
Klebsiella spp.	Klebsiella_k_locus_primary_reference (https://github.com/klebgenomics/Kaptive)	klebsiella_kl31_09	KL31	366	12	IPR049458	-	-	WzyA	b	D-Glcp	1,3	D-GlcpA
Klebsiella spp.	Klebsiella_k_locus_primary_reference (https://github.com/klebgenomics/Kaptive)	klebsiella_kl32_11	KL32	396	10	-	-	-	WzyB	a	D-Galp	1,2	L-Rhap
Klebsiella spp.	Klebsiella_k_locus_primary_reference (https://github.com/klebgenomics/Kaptive)	klebsiella_kl33_18	KL33	394	12	-	-	-	WzyC	b	D-Glcp	1,4	D-Manp
Klebsiella spp.	Klebsiella_k_locus_primary_reference (https://github.com/klebgenomics/Kaptive)	klebsiella_kl34_xan29115.1	KL34	340	11	IPR049458	-	-	WzyA	b	D-Glcp	1,3	D-GalpA
Klebsiella spp.	Klebsiella_k_locus_primary_reference (https://github.com/klebgenomics/Kaptive)	klebsiella_kl35_07	KL35	403	12	-	-	-	WzyC	b	D-Glcp	1,3	D-Galp
Klebsiella spp.	Klebsiella_k_locus_primary_reference (https://github.com/klebgenomics/Kaptive)	klebsiella_kl36_12	KL36	330	11	IPR049458	-	-	WzyA	b	D-Galp	1,3	L-Rhap
Klebsiella spp.	Klebsiella_k_locus_primary_reference (https://github.com/klebgenomics/Kaptive)	klebsiella_kl37_07	KL37	381	12	-	-	-	WzyC	b	D-Glcp	1,3	D-Galp
Klebsiella spp.	Klebsiella_k_locus_primary_reference (https://github.com/klebgenomics/Kaptive)	klebsiella_kl38_08	KL38	409	13	-	-	-	WzyA	b	D-Galp	1,4	D-Galp
Klebsiella spp.	Klebsiella_k_locus_primary_reference (https://github.com/klebgenomics/Kaptive)	klebsiella_kl39_08	KL39	403	13	IPR049458	-	-	WzyA	b	D-Glcp	1,3/4	D-Glcp/A
Klebsiella spp.	Klebsiella_k_locus_primary_reference (https://github.com/klebgenomics/Kaptive)	klebsiella_kl4_15	KL4	444	12	IPR007016	-	-	WzyC	b	D-Glcp	1,3	D-Glcp
Klebsiella spp.	Klebsiella_k_locus_primary_reference (https://github.com/klebgenomics/Kaptive)	klebsiella_kl40_13	KL40	413	10	-	-	-	WzyB	a	D-Galp	1,3	L-Rhap
Klebsiella spp.	Klebsiella_k_locus_primary_reference (https://github.com/klebgenomics/Kaptive)	klebsiella_kl41_12	KL41	395	10	-	-	-	WzyB	a	D-Galp	1,2	D-Galf
Klebsiella spp.	Klebsiella_k_locus_primary_reference (https://github.com/klebgenomics/Kaptive)	klebsiella_kl42_09	KL42	422	13	IPR049458	-	-	WzyA	-	-	-	-
Klebsiella spp.	Klebsiella_k_locus_primary_reference (https://github.com/klebgenomics/Kaptive)	klebsiella_kl43_09	KL43	376	10	-	-	-	WzyB	a	D-Galp	1,3	D-Manp
Klebsiella spp.	Klebsiella_k_locus_primary_reference (https://github.com/klebgenomics/Kaptive)	klebsiella_kl44_11	KL44	354	11	-	-	-	WzyC	b	D-Glcp	1,4	D-Glcp
Klebsiella spp.	Klebsiella_k_locus_primary_reference (https://github.com/klebgenomics/Kaptive)	klebsiella_kl45_11	KL45	391	10	-	TIGR04370	-	WzyB	b	D-Glcp	1,2	L-Rhap
Klebsiella spp.	Klebsiella_k_locus_primary_reference (https://github.com/klebgenomics/Kaptive)	klebsiella_kl46_09	KL46	402	12	-	-	-	WzyC	b	D-Galp	1,3	D-GlcpA
Klebsiella spp.	Klebsiella_k_locus_primary_reference (https://github.com/klebgenomics/Kaptive)	klebsiella_kl47_11	KL47	416	10	-	TIGR04370	-	WzyB	b	D-Galp	1,4	L-Rhap
Klebsiella spp.	Klebsiella_k_locus_primary_reference (https://github.com/klebgenomics/Kaptive)	klebsiella_kl48_10	KL48	321	11	IPR049458	-	-	WzyA	b	D-Glcp	1,3	L-Rhap
Klebsiella spp.	Klebsiella_k_locus_primary_reference (https://github.com/klebgenomics/Kaptive)	klebsiella_kl49_08	KL49	442	11	-	TIGR04370	-	WzyB	a	D-Galp	1,2	D-Manp
Klebsiella spp.	Klebsiella_k_locus_primary_reference (https://github.com/klebgenomics/Kaptive)	klebsiella_kl5_07	KL5	403	13	IPR045949	-	-	WzyC	b	D-Glcp	1,3	D-Manp
Klebsiella spp.	Klebsiella_k_locus_primary_reference (https://github.com/klebgenomics/Kaptive)	klebsiella_kl51_09	KL51	362	10	-	-	-	WzyA	a	D-Galp	1,3	D-Galp
Klebsiella spp.	Klebsiella_k_locus_primary_reference (https://github.com/klebgenomics/Kaptive)	klebsiella_kl52_13	KL52	374	12	IPR049458	-	-	WzyA	-	-	-	-
Klebsiella spp.	Klebsiella_k_locus_primary_reference (https://github.com/klebgenomics/Kaptive)	klebsiella_kl53_10	KL53	372	12	IPR049458	-	-	WzyA	b	D-Galp	1,2	L-Rhap
Klebsiella spp.	Klebsiella_k_locus_primary_reference (https://github.com/klebgenomics/Kaptive)	klebsiella_kl54_09	KL54	360	12	-	-	-	WzyC	b	D-Glcp	1,4	D-GlcpA
Klebsiella spp.	Klebsiella_k_locus_primary_reference (https://github.com/klebgenomics/Kaptive)	klebsiella_kl55_11	KL55	425	12	-	-	-	WzyC	b	D-Glcp	1,4	L-Rhap
Klebsiella spp.	Klebsiella_k_locus_primary_reference (https://github.com/klebgenomics/Kaptive)	klebsiella_kl56_13	KL56	363	12	IPR049458	-	-	WzyA	b	D-Galp	1,3	D-Glcp
Klebsiella spp.	Klebsiella_k_locus_primary_reference (https://github.com/klebgenomics/Kaptive)	klebsiella_kl57_11	KL57	392	12	IPR007016	-	PTHR37422	WzyC	b	D-Galp	1,3	D-GalpA
Klebsiella spp.	Klebsiella_k_locus_primary_reference (https://github.com/klebgenomics/Kaptive)	klebsiella_kl58_09	KL58	461	11	-	-	-	WzyB	a	D-Glcp	1,4	D-GlcpA
Klebsiella spp.	Klebsiella_k_locus_primary_reference (https://github.com/klebgenomics/Kaptive)	klebsiella_kl59_07	KL59	425	13	IPR049458	-	-	WzyA	b	D-Glcp	1,3	D-Galp
Klebsiella spp.	Klebsiella_k_locus_primary_reference (https://github.com/klebgenomics/Kaptive)	klebsiella_kl6_07	KL6	428	12	IPR007016	-	PTHR37422	WzyC	b	D-Glcp	1,3	D-Manp
Klebsiella spp.	Klebsiella_k_locus_primary_reference (https://github.com/klebgenomics/Kaptive)	klebsiella_kl60_07	KL60	365	12	IPR049458	-	-	WzyA	b	D-Glcp	1,3	D-GlcpA
Klebsiella spp.	Klebsiella_k_locus_primary_reference (https://github.com/klebgenomics/Kaptive)	klebsiella_kl61_09	KL61	449	13	IPR007016	-	PTHR37422	WzyC	b	D-Glcp	1,6	D-Glcp
Klebsiella spp.	Klebsiella_k_locus_primary_reference (https://github.com/klebgenomics/Kaptive)	klebsiella_kl62_11	KL62	388	12	IPR007016	-	PTHR37422	WzyC	b	D-Galp	1,4	D-Glcp
Klebsiella spp.	Klebsiella_k_locus_primary_reference (https://github.com/klebgenomics/Kaptive)	klebsiella_kl63_10	KL63	429	11	-	TIGR04370	-	WzyB	a	D-Galp	1,3	D-GalpA
Klebsiella spp.	Klebsiella_k_locus_primary_reference (https://github.com/klebgenomics/Kaptive)	klebsiella_kl64_10	KL64	403	12	-	-	PTHR37422	WzyC	b	D-Glcp	1,4	D-Manp
Klebsiella spp.	Klebsiella_k_locus_primary_reference (https://github.com/klebgenomics/Kaptive)	klebsiella_kl65_07	KL65	420	13	IPR049458	-	-	WzyA	-	-	-	-
Klebsiella spp.	Klebsiella_k_locus_primary_reference (https://github.com/klebgenomics/Kaptive)	klebsiella_kl66_09	KL66	472	13	-	-	-	WzyC	a	D-Galp	1,2	D-GlcpA
Klebsiella spp.	Klebsiella_k_locus_primary_reference (https://github.com/klebgenomics/Kaptive)	klebsiella_kl67_07	KL67	333	11	IPR049458	-	-	WzyA	b	D-Glcp	1,3	L-Rhap
Klebsiella spp.	Klebsiella_k_locus_primary_reference (https://github.com/klebgenomics/Kaptive)	klebsiella_kl68_12	KL68	413	12	-	-	-	WzyC	b	D-Galp	1,2	D-GalpA
Klebsiella spp.	Klebsiella_k_locus_primary_reference (https://github.com/klebgenomics/Kaptive)	klebsiella_kl69_10	KL69	415	12	-	-	-	WzyC	b	D-Glcp	1,4	D-Manp
Klebsiella spp.	Klebsiella_k_locus_primary_reference (https://github.com/klebgenomics/Kaptive)	klebsiella_kl7_10	KL7	391	13	IPR049458	-	-	WzyA	b	D-Glcp	1,3	D-Glcp
Klebsiella spp.	Klebsiella_k_locus_primary_reference (https://github.com/klebgenomics/Kaptive)	klebsiella_kl70_10	KL70	385	12	IPR049458	-	-	WzyA	b	D-Galp	1,2	L-Rhap
Klebsiella spp.	Klebsiella_k_locus_primary_reference (https://github.com/klebgenomics/Kaptive)	klebsiella_kl71_13	KL71	403	12	IPR007016	-	PTHR37422	WzyC	b	D-Glcp	1,2	L-Rhap
Klebsiella spp.	Klebsiella_k_locus_primary_reference (https://github.com/klebgenomics/Kaptive)	klebsiella_kl72_12	KL72	392	10	-	-	-	WzyB	b	D-Glcp	1,3	L-Rhap
Klebsiella spp.	Klebsiella_k_locus_primary_reference (https://github.com/klebgenomics/Kaptive)	klebsiella_kl74_11	KL74	410	12	IPR007016	-	-	WzyC	b	D-Galp	1,2	D-Manp
Klebsiella spp.	Klebsiella_k_locus_primary_reference (https://github.com/klebgenomics/Kaptive)	klebsiella_kl79_12	KL79	395	12	IPR049458	-	-	WzyA	b	D-Galp	1,2	D-GlcpA
Klebsiella spp.	Klebsiella_k_locus_primary_reference (https://github.com/klebgenomics/Kaptive)	klebsiella_kl8_07	KL8	350	12	IPR049458	-	-	WzyA	b	D-Glcp	1,3	D-Galp
Klebsiella spp.	Klebsiella_k_locus_primary_reference (https://github.com/klebgenomics/Kaptive)	klebsiella_kl81_09	KL81	371	12	IPR049458	-	-	WzyA	b	D-Galp	1,2	L-Rhap
Klebsiella spp.	Klebsiella_k_locus_primary_reference (https://github.com/klebgenomics/Kaptive)	klebsiella_kl82_09	KL82	346	12	IPR049458	-	-	WzyA	b	D-Glcp	1,3	D-Galp
Klebsiella spp.	Klebsiella_k_locus_primary_reference (https://github.com/klebgenomics/Kaptive)	klebsiella_kl9_10	KL9	390	10	-	-	-	WzyB	a	D-Galp	1,3	L-Rhap
Klebsiella spp.	BAT24408.1	klebsiella_kl80_bat24408.1	KL80	412	12	IPR007016	-	PTHR37422	WzyC	b	D-Galp	1,2	D-Manp
P. aeruginosa	AAM27546.1	paeruginosa_o1_aam27546.1	O1	474	12	IPR029468	-	-	WzyB	a	D-QuipNAc	1,4	D-GalpNAc
P. aeruginosa	AAM27560.1	paeurginosa_o10_aam27560.1	O10	444	11	-	TIGR04370	-	WzyB	a	D-QuipNAc	1,3	L-Rhap2Ac
P. aeruginosa	AAM27574.1	paeurginosa_o11_aam27574.1	O11	411	12	-	-	-	WzyC	b	D-FucpNAc	1,2	D-Glcp
P. aeruginosa	AAM27595.1	paeurginosa_o12_aam27595.1	O12	412	10	-	-	-	WzyB	a	D-QuipNAc	1,8	8eLeg5Ac7Ac
P. aeruginosa	AAM27615.1	paeurginosa_o13_aam27615.1	O13	391	11	-	-	PTHR37422	WzyC	b	D-QuipNAc	1,2	L-Rhap
P. aeruginosa	AAM27645.1	paeurginosa_o15_lory_aam27645.1	O15	416	12	-	-	PTHR37422	WzyC	a	D-GalpNAc	1,2	D-Ribf
P. aeruginosa	ABM21470.1	paeruginosa_o16_prophage_abm21470.1	O16	384	12	-	-	-	WzyC	b	D-FucpNAc	1,4	D-ManNAc3NAmA
P. aeruginosa	AAM27693.1	paeruginosa_o18_aam27693.1	O18	438	12	-	-	-	WzyB	a	D-FucpNAc	1,4	L-GulNAc3NAmA
P. aeruginosa	AAM27711.1	paeruginosa_o19_aam27711.1	O19	444	11	-	TIGR04370	-	WzyB	a	D-QuipNAc	1,3	L-Rhap
P. aeruginosa	ABM21469.1	paeruginosa_o2_prophage_abm21469.1	O2	384	12	-	-	-	WzyC	b	D-FucpNAc	1,4	D-ManNAc3NAmA
P. aeruginosa	AAM27748.1	paeruginosa_o20_aam27748.1	O20	438	12	-	-	-	WzyB	a	D-FucpNAc4Ac	1,4	L-GulNAc3NAmA
P. aeruginosa	AAM27766.1	paeruginosa_o3_aam27766.1	O3	416	12	-	-	PTHR37422	WzyC	b	D-QuipNAc4NSHb	1,2	L-Rhap3Ac
P. aeruginosa	AAM27782.1	paeruginosa_o4_aam27782.1	O4	399	11	-	-	-	WzyC	a	D-QuipNAc	1,2	L-Rhap
P. aeruginosa	AAG06542.1	paeruginosa_o5_aag06542.1	O5	438	12	-	-	-	WzyB	a	D-FucpNAc	1,4	D-ManNAc3NAmA
P. aeruginosa	AAM27831.1	paeurginosa_o7_aam27831.1	O7	403	12	-	-	-	WzyC	b	D-FucpNAc	1,4	Pse5RHb7Fo4Ac
P. aeruginosa	AAM27851.1	paeurginosa_o8_aam27851.1	O8	379	11	-	-	-	WzyC	b	D-FucpNAc	1,4	Pse5Ac7Fo4Ac
P. aeruginosa	AAM27879.1	paeurginosa_o9_aam27879.1	O9	384	12	IPR049458	-	-	WzyA	b	D-QuipNAc	1,3	Pse5Ac7RHb4Ac
Proteus spp.	AXY99318.1	proteus_o1_axy99318.1	O1	414	13	-	-	-	WzyA	b	D-GlcpNAc	1,4	D-GalpNAc
Proteus spp.	ADL32296.1	proteus_o10_adl32296.1	O10	396	11	-	-	-	WzyB	a	D-GlcpNAc	1,4	D-GalpNAc
Proteus spp.	AXY99417.1	proteus_o11_axy99417.1	O11	391	12	IPR007016	-	PTHR37422	WzyC	b	D-GlcpNAc	1,4	D-GlcpA
Proteus spp.	AXY99432.1	proteus_o12_axy99432.1	O12	377	12	IPR049458	-	-	WzyA	b	D-GlcpNAc	1,3	D-Gro-1-P
Proteus spp.	AXY99447.1	proteus_o13_axy99447.1	O13	348	12	IPR049458	-	-	WzyA	b	D-GlcpNAc	1,3	D-Galp
Proteus spp.	AXY99463.1	proteus_o14ab_axy99463.1	O14ab	338	11	IPR049458	-	-	WzyA	b	D-GalpNAc	1,4	D-Galp
Proteus spp.	AXY99476.1	proteus_o16_axy99476.1	O16	455	12	IPR029468	-	-	WzyB	a	D-GlcpNAc	1,2	D-Rib-ol-5-P
Proteus spp.	AXY99492.1	proteus_o17_axy99492.1	O17	447	11	-	-	-	WzyB	a	D-GlcpNAc	1,2	D-FucpR3HOBu
Proteus spp.	QIM23321.1	proteus_o18_qim23321.1	O18	354	12	IPR049458	-	-	WzyA	b	D-GlcpNAc	1,3	D-GlcpNAc-1-P
Proteus spp.	AXY99523.1	proteus_o19a_axy99523.1	O19a	364	12	IPR049458	-	-	WzyA	b	D-GlcpNAc	1,3	D-Galp
Proteus spp.	AXY99336.1	proteus_o2_axy99336.1	O2	364	12	IPR049458	-	-	WzyA	b	D-GlcpNAc6Ac	1,2	D-Glcp
Proteus spp.	AXY99542.1	proteus_o20_axy99542.1	O20	407	12	IPR007016	-	PTHR37422	WzyC	b	D-GlcpNAc	1,3	D-GlcpNAc
Proteus spp.	AXY99555.1	proteus_o21_axy99555.1	O21	391	12	-	-	-	WzyC	a	D-GlcpNAc	1,4	D-GalpNAc
Proteus spp.	ADL32314.1	proteus_o23a_23c_adl32314.1	O23ac	398	10	-	-	-	WzyB	b	D-GlcpNAc6Ac	1,2	D-GalpA4Ac
Proteus spp.	AXY99570.1	proteus_o24_axy99570.1	O24	391	12	IPR007016	-	PTHR37422	WzyC	b	D-GlcpNAc	1,4	D-GalpNAc
Proteus spp.	AXY99585.1	proteus_o25_axy99585.1	O25	392	12	-	-	-	WzyC	b	D-GlcpNAc	1,2	L-Rhap
Proteus spp.	AXY99601.1	proteus_o26_axy99601.1	O26	394	12	-	-	-	WzyC	b	D-GlcpNAc	1,4	D-GalpA6Lys
Proteus spp.	ADL32320.1	proteus_o27_adl32320.1	O27	363	12	IPR049458	-	-	WzyA	b	D-GlcpNAc	1,3	D-GlcpA6Lys
Proteus spp.	AXZ00116.1	proteus_o28_axz00116.1	O28	393	12	-	-	-	WzyC	b	D-GlcpNAc	1,4	D-GalpA6Lys
Proteus spp.	AXY99612.1	proteus_o29a_axy99612.1	O29ab	391	12	IPR007016	-	PTHR37422	WzyC	b	D-GalpNAc	1,4	D-GalpNAc
Proteus spp.	AXY99624.1	proteus_o30_axy99624.1	O30	368	12	-	-	-	WzyC	b	D-GlcpNAc4Ac	1,4	D-GlcpA
Proteus spp.	AXY99635.1	proteus_o31ab_axy99635.1	O31ab	385	10	-	-	-	WzyB	a	D-GlcpNAc	1,6	D-GlcpNAc3SLac
Proteus spp.	AXY99655.1	proteus_o32_axy99655.1	O32	360	12	IPR049458	-	-	WzyA	b	D-GlcpNAc	1,4	D-GalpA
Proteus spp.	AXY99670.1	proteus_o33_axy99670.1	O33	371	12	-	-	-	WzyC	b	D-GlcpNAc	1,2	D-Galp
Proteus spp.	AXY99682.1	proteus_o34_axy99682.1	O34	397	13	IPR049458	-	-	WzyA	b	D-GalpNAc	1,4	D-GalpNAc-1-P
Proteus spp.	AXY99696.1	proteus_o36_axy99696.1	O36	400	10	-	TIGR04370	-	WzyB	a	D-GlcpNAc	1,2	D-Ribf
Proteus spp.	AXY99713.1	proteus_o37ab_axy99713.1	O37ab	424	11	-	-	-	WzyB	a	D-GlcpNAc6Ac	1,3	D-GlcpA
Proteus spp.	ADL32282.1	proteus_o3a_3c_adl32282.1	O3ac	344	12	IPR049458	-	-	WzyA	b	D-GalpNAc	1,6	D-GalpNAc
Proteus spp.	AXY99727.1	proteus_o40_axy99727.1	O40	355	12	IPR049458	-	-	WzyA	b	D-GlcpNAc	1,3	D-GlcpNAc4RLac
Proteus spp.	AXY99743.1	proteus_o41_axy99743.1	O41	338	11	IPR049458	-	-	WzyA	b	D-GalpNAc	1,3	D-Galp
Proteus spp.	AXY99754.1	proteus_o42_axy99754.1	O42	382	10	-	NF033860	-	WzyB	a	D-GlcpNAc	1,3	L-FucpNAc
Proteus spp.	AXY99768.1	proteus_o44_axy99768.1	O44	396	12	-	-	-	WzyC	b	D-GalpNAc	1,4	D-Glcp
Proteus spp.	AXY99788.1	proteus_o45_axy99788.1	O45	396	12	IPR049458	-	-	WzyA	b	D-GlcpNAc	1,2	L-Fucp3NAc
Proteus spp.	ADL32336.1	proteus_o47_adl32336.1	O47	414	12	IPR007016	-	-	WzyC	b	D-GalpNAc	1,3	D-GalpNAc
Proteus spp.	AXY99801.1	proteus_o48_axy99801.1	O48	390	12	-	-	-	WzyC	b	D-GlcpNAc	1,2	D-Galp-1-P
Proteus spp.	AXY99352.1	proteus_o5_axy99352.1	O5	379	12	IPR007016	-	PTHR37422	WzyC	b	D-GlcpNAc	1,4	D-GlcpNAc3Ac6Ac
Proteus spp.	AXY99813.1	proteus_o50_axy99813.1	O50	418	13	IPR049458	-	-	WzyA	b	D-GlcpNAc	1,3	D-GlcpA
Proteus spp.	AXY99835.1	proteus_o51_axy99835.1	O51	401	12	-	-	-	WzyA	b	D-GlcpNAc	1,3	D-GalpNAc-4,6RPyr
Proteus spp.	AXY99843.1	proteus_o52_axy99843.1	O52	356	10	-	-	-	WzyC	b	D-GlcpNAc	1,2	D-Galp-4,6RPyr
Proteus spp.	AXY99857.1	proteus_o53_axy99857.1	O53	387	12	IPR049458	-	-	WzyA	b	D-FucpNAc4N	1,1	D-Rib-ol-5-P
Proteus spp.	AXY99873.1	proteus_o54ab_axy99873.1	O54ab	455	12	IPR029468	-	-	WzyB	a	D-GlcpNAc	1,3	D-Galp
Proteus spp.	AXY99885.1	proteus_o55_axy99885.1	O55	426	11	-	TIGR04370	-	WzyB	a	D-GlcpNAc	1,3	D-GalpNAcA
Proteus spp.	AXY99906.1	proteus_o56_axy99906.1	O56	427	11	-	-	-	WzyB	a	D-GalpNAc	1,4	D-Quip3NAc
Proteus spp.	AXY99926.1	proteus_o57_axy99926.1	O57	359	12	-	-	-	WzyC	b	D-GalpNAc	1,4	D-GalpNAc
Proteus spp.	AXY99943.1	proteus_o58_axy99943.1	O58	401	12	-	-	-	WzyC	b	D-GlcpNAc6Ac	1,4	D-GalpNAc
Proteus spp.	AXY99961.1	proteus_o59_axy99961.1	O59	404	12	-	-	-	WzyC	b	D-GlcpNAc	1,2	D-Quip3NAc-Ala
Proteus spp.	AXY99368.1	proteus_o6_axy99368.1	O6	429	12	-	-	-	WzyC	b	D-GlcpNAc	1,4	L-FucpNAc
Proteus spp.	AXZ00132.1	proteus_o60_axz00132.1	O60	368	12	-	-	-	WzyC	b	D-GlcpNAc	1,4	D-GlcpA-6SCetLys
Proteus spp.	AXY99974.1	proteus_o61_axy99974.1	O61	370	12	-	-	-	WzyC	b	D-GlcpNAc	1,4	D-GalpNAc
Proteus spp.	AXY99991.1	proteus_o62_axy99991.1	O62	349	11	IPR049458	-	-	WzyA	b	D-GlcpNAc	1,3	L-Rhap
Proteus spp.	AXZ00003.1	proteus_o65_axz00003.1	O65	393	12	-	-	-	WzyC	b	D-GalpNAc	1,4	D-GalpNAc
Proteus spp.	AXZ00013.1	proteus_o67_axz00013.1	O67	394	12	-	-	-	WzyC	b	D-GlcpNAc	1,4	D-GalpN
Proteus spp.	AXZ00032.1	proteus_o69_axz00032.1	O69	422	12	-	-	-	WzyC	b	D-GlcpNAc6Ac	1,6	D-GlcpN-L-Ala-3Ac
Proteus spp.	AXZ00047.1	proteus_o71_axz00047.1	O71	361	12	IPR049458	-	-	WzyA	b	D-GlcpNAc	1,4	D-GalpA
Proteus spp.	AXZ00060.1	proteus_o72ab_axz00060.1	O72ab	370	12	-	-	-	WzyC	b	D-GalpNAc	1,4	D-Galp
Proteus spp.	AXZ00072.1	proteus_o73ab_axz00072.1	O73ab	381	12	IPR049458	-	-	WzyA	b	D-GalpNAc	1,4	D-Rib-ol-5-P
Proteus spp.	AXZ00085.1	proteus_o74_axz00085.1	O74	474	12	-	-	-	WzyB	a	D-GlcpNAc	1,3	D-GalpA-2Ac
Proteus spp.	AXZ00101.1	proteus_o75_axz00101.1	O75	356	12	IPR049458	-	-	WzyA	b	D-GlcpNAc	1,3	D-Galp
Proteus spp.	AXY99381.1	proteus_o8_axy99381.1	O8	398	10	-	TIGR04370	-	WzyB	a	D-GlcpNAc	1,3	D-GlcpA
Proteus spp.	AXY99400.1	proteus_o9_axy99400.1	O9	259	8	-	-	-	WzyA	a	D-GlcpNAc	1,4	D-GalpA
Salmonella enterica	AAV77445.1	salmonella_a_aav77445.1	A	407	11	-	TIGR04370	-	WzyB	a	D-Galp	1,2	D-Manp
Salmonella enterica	AAA27210.1	salmonella_b1_aaa27210.1	B1	407	11	-	TIGR04370	-	WzyB	a	D-Galp	1,2	D-Manp
Salmonella enterica	ACF92750.1	salmonella_b2_acf92750.1	B2	391	10	-	-	-	WzyB	a	D-Galp	1,6	D-Manp
Salmonella enterica	ACF64132.1	salmonella_c2_acf64132.1	C2	399	11	IPR007016	-	PTHR37422	WzyC	a	D-Galp	1,4	L-Rhap
Salmonella enterica	ACH74809.1	salmonella_d1_ach74809.1	D1	407	11	-	-	-	WzyB	a	D-Galp	1,2	D-Manp
Salmonella enterica	AGS07363.1	salmonella_d2_ags07363.1	D2	396	10	IPR029468	TIGR04370	-	WzyB	a	D-Galp	1,6	D-Manp
Salmonella enterica	AGS07346.1	salmonella_d3_ags07346.1	D3	391	10	-	-	-	WzyB	a	D-Galp	1,6	D-Manp
Salmonella enterica	CAA43077.1	salmonella_e_caa43077.1	E	392	10	IPR029468	-	-	WzyB	a	D-Galp	1,6	D-Manp
Salmonella enterica	AFW04820.1	salmonella_o11_afw04820.1	O11 (F)	359	12	IPR049458	-	-	WzyA	b	D-GlcpNAc	1,3	D-Galp
Salmonella enterica	ABP35578.1	salmonella_o13_abp35578.1	O13 (G)	388	10	-	-	-	WzyB	a	D-GlcpNAc	1,2	L-Fucp
Salmonella enterica	ADV17638.1	salmonella_o16_adv17638.1	O16(I)	410	11	IPR049458	-	-	WzyA	b	D-GalpNAc	1,4	D-GalpNAc
Salmonella enterica	ABL63455.1	salmonella_o17_abl63455.1	O17(J)	372	12	-	-	-	WzyC	b	D-GlcpNAc	1,2	D-Galp
Salmonella enterica	ABL63451.1	salmonella_o18_abl63451.1	O18(K)	440	12	-	-	-	WzyB	a	D-GalpNAc	1,4	D-Manp
Salmonella enterica	AFW04741.1	salmonella_o21_afw04741.1	O21(L)	362	12	IPR007016	-	PTHR37422	WzyC	b	D-GalpNAc	1,4	D-GalpNAc
Salmonella enterica	ACO40479.1	salmonella_o28_aco40479.1	O28ac(M)	431	11	-	-	-	WzyB	a	D-GalpNAc	1,4	D-Quip3NAc
Salmonella enterica	AAV34507.1	salmonella_o30_aav34507.1	O30(N)	383	10	-	-	-	WzyB	a	D-GalpNAc	1,2	D-Rhap4NAc
Salmonella enterica	AAK83017.1	salmonella_o35_aak83017.1	O35 (O)	354	11	-	-	-	WzyC	b	D-GlcpNAc	1,4	D-Glcp
Salmonella enterica	ADV17634.1	salmonella_o38_adv17634.1	O38(P)	360	12	IPR049458	-	-	WzyA	b	D-GalpNAc	1,3	D-Galp
Salmonella enterica	AFW04696.1	salmonella_o39_afw04696.1	O39(Q)	446	13	-	-	-	WzyC	a	D-GalpNAc	1,2	D-Quip3NAc
Salmonella enterica	AFW04706.1	salmonella_o40_afw04706.1	O40(R)	455	12	IPR029468	TIGR04370	-	WzyB	a	D-GalpNAc	1,4	D-GalpNAc
Salmonella enterica	ACJ26814.1	salmonella_o41_acj26814.1	O41(S)	406	10	-	NF033860	-	WzyB	a	D-GlcpNAc	1,2	D-Manp
Salmonella enterica	AFW04812.1	salmonella_o42_afw04812.1	O42(T)	338	11	IPR049458	-	-	WzyA	b	D-GlcpNAc	1,3	L-Rhap
Salmonella enterica	AFW04802.1	salmonella_o43_afw04802.1	O43(U)	447	12	-	-	-	WzyB	a	D-GalpNAc	1,3	D-GlcpNAc
Salmonella enterica	AFW04828.1	salmonella_o44_afw04828.1	O44(V)	377	12	-	-	-	WzyC	b	D-GlcpNAc	1,2	D-Glcp
Salmonella enterica	AFW04716.1	salmonella_o45_afw04716.1	O45(W)	387	12	-	-	-	WzyC	b	D-GlcpNAc	1,4	D-GlcpA
Salmonella enterica	AFW04867.1	salmonella_o47_afw04867.1	O47(X)	364	12	IPR049458	-	-	WzyA	a	D-GlcpNAc	1,2	D-Rib-ol-5-P
Salmonella enterica	AFW04668.1	salmonella_o48_afw04668.1	O48(Y)	397	12	-	-	PTHR37422	WzyC	b	D-GlcpNAc	1,4	Neu5Ac
Salmonella enterica	AAV34523.1	salmonella_o50_aav34523.1	O50(Z)	325	11	-	-	-	WzyA	b	D-GalpNAc	1,6	D-GlcpNAc
Salmonella enterica	AFW04888.1	salmonella_o51_afw04888.1	O51	341	12	IPR049458	-	-	WzyA	b	D-GlcpNAc	1,6	D-Glcp
Salmonella enterica	AFW04790.1	salmonella_o52_afw04790.1	O52	354	9	-	TIGR04370	-	WzyB	a	D-GlcpNAc	1,2	D-Ribf
Salmonella enterica	AFW04837.1	salmonella_o53_afw04837.1	O53	372	12	-	-	-	WzyC	b	D-GlcpNAc	1,2	D-Galf
Salmonella enterica	ADI39344.1	salmonella_o55_adi39344.1	O55	375	12	IPR049458	-	-	WzyA	b	D-GlcpNAc	1,2	D-Glcp
Salmonella enterica	ADI77005.1	salmonella_o56_adi77005.1	O56	392	10	-	NF033860	-	WzyB	a	D-GlcpNAc	1,3	D-Quip4N6SerAc
Salmonella enterica	AFW04883.1	salmonella_o57_afw04883.1	O57	345	12	IPR049458	-	-	WzyA	b	D-GalpNAc	1,3	L-Rhap
Salmonella enterica	ACJ26787.1	salmonella_o58_acj26787.1	O58	421	10	-	NF033860	-	WzyB	a	D-GlcpNAc	1,3	D-Quip4NAlaR
Salmonella enterica	AFW04847.1	salmonella_o59_afw04847.1	O59	411	12	-	-	-	WzyC	b	D-GlcpNAc	1,2	D-Galp
Salmonella enterica	AAQ91207.1	salmonella_o6_14_aaq91207.1	O6,14(H)	447	12	-	-	-	WzyB	a	D-GlcpNAc	1,6	D-Manp
Salmonella enterica	AAB49386.1	salmonella_c1_aab49386.1	O6/O7 (C1)	359	12	IPR049458	-	-	WzyA	b	D-GlcpNAc	1,2	D-Manp
Salmonella enterica	AFW04860.1	salmonella_o60_afw04860.1	O60	349	12	IPR049458	-	-	WzyA	b	D-GlcpNAc	1,2	D-Manp
Salmonella enterica	AFW04757.1	salmonella_o61_afw04757.1	O61	441	12	-	-	-	WzyB	a	D-GlcpNAc	1,8	8eLeg5R7Ac
Salmonella enterica	AFW04785.1	salmonella_o62_afw04785.1	O62	340	11	IPR049458	-	-	WzyA	b	D-GlcpNAc	1,3	L-Rhap
Salmonella enterica	AFW04735.1	salmonella_o63_afw04735.1	O63	314	10	IPR049458	-	-	WzyA	b	D-GalpNAc	1,3	D-Galp
Salmonella enterica	AFW04684.1	salmonella_o65_afw04684.1	O65	374	12	IPR049458	-	-	WzyA	b	D-GlcpNAc	1,4	D-Manp
Shigella spp.	UGN72586.1	shigella_b1_ugn72586.1	B1/O149	354	12	IPR049458	-	-	WzyA	b	D-GlcpNAc	1,3	D-GlcpNAc
Shigella spp.	AAW29815.1	shigella_b10_aaw29815.1	B10	350	12	IPR049458	-	-	WzyA	b	D-GalpNAc	1,3	D-Galp
Shigella spp.	AAS98031.1	shigella_b11_aas98031.1	B11	342	12	IPR049458	-	-	WzyA	b	D-GlcpNAc	1,4	D-GlcpA
Shigella spp.	ACD37026.1	shigella_b12_acd37026.1	B12	379	12	-	-	-	WzyC	b	D-GlcpNAc	1,4	D-GlcpA
Shigella spp.	AAR24270.1	shigella_b13_aar24270.1	B13	392	10	-	NF033860	-	WzyB	a	D-GlcpNAc	1,3	L-QuiNAc
Shigella spp.	ACD37051.1	shigella_b14_acd37051.1	B14	403	12	-	-	-	WzyC	b	D-GlcpNAc	1,6	D-Galp
Shigella spp.	ACD37078.1	shigella_b15_acd37078.1	B15/O112ab	392	12	IPR049458	-	-	WzyA	b	D-GalpNAc	1,4	D-GalpNAc
Shigella spp.	ABD19779.1	shigella_b16_abd19779.1	B16	385	12	-	-	-	WzyC	b	D-GlcpNAc	1,4	D-GlcpA
Shigella spp.	ABI55342.1	shigella_b17_abi55342.1	B17	403	13	IPR049458	-	-	WzyA	b	D-GalpNAc	1,6	D-Glcp
Shigella spp.	AAY23339.1	shigella_b18_aay23339.1	B18	369	10	-	TIGR04370	-	WzyB	a	D-GalpNAc	1,3	L-Rhap
Shigella spp.	ACD37126.1	shigella_b2_acd37126.1	B2	395	11	-	TIGR04370	-	WzyB	a	D-GlcpNAc	1,2	L-Rhap
Shigella spp.	ACD37037.1	shigella_b3_acd37037.1	B3/O167	416	12	-	-	-	WzyC	b	D-GlcpNAc	1,2	D-GalpA
Shigella spp.	AAL27318.1	shigella_b4_aal27318.1	B4	430	12	IPR007016	-	-	WzyC	b	D-GlcpNAc	1,2	L-Rhap
Shigella spp.	AAL27327.1	shigella_b5_aal27327.1	B5	363	10	-	-	-	WzyB	a	D-GlcpNAc	1,2	D-Galp
Shigella spp.	AAL27339.1	shigella_b6_aal27339.1	B6	350	12	IPR049458	-	-	WzyA	b	D-GalpNAc	1,3	D-Galp
Shigella spp.	ACD37072.1	shigella_b7_acd37072.1	B7	431	12	IPR046303	-	-	WzyB	a	D-GlcpNAc	1,8	Pse5Ac7AR
Shigella spp.	ACA24754.1	shigella_b8_aca24754.1	B8/O143	360	10	-	-	-	WzyC	b	D-GlcpNAc	1,2	D-GalpA
Shigella spp.	AAL27351.1	shigella_b9_aal27351.1	B9	405	10	-	TIGR04370	-	WzyB	a	D-GlcpNAc	1,3	L-Rhap
Shigella spp.	UGN72378.1	shigella_d1_ugn72378.1	D1	380	11	-	TIGR04370	-	WzyB	a	D-GlcpNAc	1,3	L-Rhap
Shigella spp.	ACA24912.1	shigella_d10_aca24912.1	D10	473	14	-	-	-	WzyC	a	D-GlcpNAc	1,2	D-Manp
Shigella spp.	ACA24840.1	shigella_d11_aca24840.1	D11/O29	387	12	IPR049458	-	-	WzyA	b	D-GlcpNAc	1,1	D-Gro3P
Shigella spp.	ACA24811.1	shigella_d12_aca24811.1	D12/O152	357	12	IPR049458	-	-	WzyA	b	D-GlcpNAc	1,3	D-GlcpNAc
Shigella spp.	ACA24792.1	shigella_d13_aca24792.1	D13/O150	365	12	IPR049458	-	-	WzyA	b	D-GlcpNAc	1,3	D-GlcpNAc
Shigella spp.	ACD37006.1	shigella_d2_acd37006.1	D2/O112ac	361	12	-	-	-	WzyC	b	D-GalpNAc	1,4	D-GalpNAc
Shigella spp.	ACD37105.1	shigella_d3_acd37105.1	D3/O124	367	12	IPR049458	-	-	WzyA	b	D-GalpNAc	1,3	D-Galp
Shigella spp.	ACD36984.1	shigella_d4_acd36984.1	D4/O168	410	12	IPR007016	-	PTHR37422	WzyC	b	D-GlcpNAc	1,4	D-GlcpNAc
Shigella spp.	ACA24868.1	shigella_d5_aca24868.1	D5/O58	443	12	-	-	-	WzyC	b	D-GlcpNAc	1,4	D-Manp
Shigella spp.	AAR97964.1	shigella_d7_aar97964.1	D7/O121	396	10	-	NF033860	-	WzyB	a	D-GlcpNAc	1,3	D-Qui4N
Shigella spp.	ACA24776.1	shigella_d8_aca24776.1	D8	408	13	IPR049458	-	-	WzyA	b	D-GalpNAc	1,6	D-Glcp
Shigella spp.	ACD37111.1	shigella_d9_acd37111.1	D9	401	12	-	-	-	WzyC	b	D-GlcpNAc	1,2	D-Galp
Shigella spp.	UGN72493.1	shigella_f2_ugn72493.1	F1-5	382	12	-	-	-	WzyC	b	D-GlcpNAc	1,2	L-Rhap
Shigella spp.	ACA24772.1	shigella_f6_aca24772.1	F6/O147	395	12	-	-	-	WzyC	b	D-GalpNAc	1,2	L-Rhap
S. pneumoniae	CAI32705.1	spneumoniae_1_cai32705.1	1	434	12	-	TIGR04370	-	WzyB	a	D-FucpNAc4N	1,4	D-GalpA
S. pneumoniae	CAI32727.1	spneumoniae_2_cai32727.1	2	387	11	IPR007016	-	-	WzyC	b	D-Glcp	1,3	L-Rhap
S. pneumoniae	CAI32772.1	spneumoniae_4_cai32772.1	4	466	12	IPR029468	-	-	WzyB	a	D-GalpNAc	1,4	D-Galp
S. pneumoniae	CAI32797.1	spneumoniae_5_cai32797.1	5	401	12	-	-	-	WzyC	b	D-QuipNAc	1,4	D-Glcp
S. pneumoniae	CAI32957.1	spneumoniae_8_cai32957.1	8	387	12	-	-	-	WzyC	b	D-Glcp	1,4	D-Glcp
S. pneumoniae	CAI33309.1	spneumoniae_13_cai33309.1	13	386	12	-	-	-	WzyC	b	D-Glcp	1,3	D-Galf
S. pneumoniae	CAI33324.1	spneumoniae_14_cai33324.1	14	390	12	IPR007016	-	-	WzyC	b	D-Glcp	1,6	D-GlcpNAc
S. pneumoniae	CAI33745.1	spneumoniae_21_cai33745.1	21	406	12	-	-	-	WzyC	-	-	-	-
S. pneumoniae	CAI34008.1	spneumoniae_27_cai34008.1	27	374	12	IPR049458	-	-	WzyA	b	D-Glcp	1,3	D-GlcpNAc
S. pneumoniae	CAI34080.1	spneumoniae_29_cai34080.1	29	393	12	-	-	-	WzyC	b	D-Galp	1,6	D-Galf
S. pneumoniae	CAI34099.1	spneumoniae_31_cai34099.1	31	420	12	-	-	-	WzyC	b	D-Galf	1,2	L-Rhap
S. pneumoniae	CAI34269.1	spneumoniae_34_cai34269.1	34	456	11	-	TIGR04370	-	WzyB	a	D-Glcp	1,5	D-Galf
S. pneumoniae	CAI34369.1	spneumoniae_36_cai34369.1	36	398	12	-	-	-	WzyC	-	-	-	-
S. pneumoniae	CAI34388.1	spneumoniae_37_cai34388.1	37	407	12	IPR007016	-	-	WzyC	b	D-Glcp	1,3	D-Glcp
S. pneumoniae	CAI34407.1	spneumoniae_38_cai34407.1	38	476	12	IPR029468	TIGR04370	-	WzyB	-	-	-	-
S. pneumoniae	CAI34436.1	spneumoniae_39_cai34436.1	39	425	12	-	-	-	WzyA	b	D-Galp	1,4	D-GalpNAc
S. pneumoniae	CAI34454.1	spneumoniae_40_cai34454.1	40	410	12	-	-	-	WzyC	-	-	-	-
S. pneumoniae	CAI34519.1	spneumoniae_42_cai34519.1	42	397	12	-	-	-	WzyC	b	D-Glcp	1,6	D-Galf
S. pneumoniae	CAI34544.1	spneumoniae_43_cai34544.1	43	365	12	-	-	-	WzyC	-	-	-	-
S. pneumoniae	CAI34753.1	spneumoniae_44_cai34753.1	44	403	12	IPR007016	-	PTHR37422	WzyC	-	-	-	-
S. pneumoniae	CAI34587.1	spneumoniae_45_cai34587.1	45	362	12	IPR049458	-	-	WzyA	b	D-GalpNAc	1,2	L-Rhap
S. pneumoniae	CAI34613.1	spneumoniae_46_cai34613.1	46	403	12	IPR007016	-	PTHR37422	WzyC	-	-	-	-
S. pneumoniae	CAI34680.1	spneumoniae_48_cai34680.1	48	393	12	-	-	-	WzyC	-	-	-	-
S. pneumoniae	CAI33048.1	spneumoniae_10a_cai33048.1	10A	416	12	-	-	-	WzyA	b	D-Galp	1,4	D-GalpNAc
S. pneumoniae	CAI34733.1	spneumoniae_10b_cai34733.1	10B	416	12	-	-	-	WzyA	b	D-Galp	1,4	D-GalpNAc
S. pneumoniae	CAI33084.1	spneumoniae_10c_cai33084.1	10C	416	11	-	-	-	WzyA	b	D-Galp	1,4	D-GalpNAc
S. pneumoniae	WP_050150299.1	spneumoniae_10d_39x	10D-39X	424	12	-	-	-	WzyA	b	D-Glcp	1,4	D-GalpNAc
S. pneumoniae	CAI33105.1	spneumoniae_10f_cai33105.1	10F	416	11	-	-	-	WzyA	b	D-Galp	1,4	D-GalpNAc
S. pneumoniae	CAI33128.1	spneumoniae_11a_cai33128.1	11A	390	12	IPR007016	-	PTHR37422	WzyC	b	D-Glcp	1,6	D-Glcp
S. pneumoniae	CAI33149.1	spneumoniae_11b_cai33149.1	11B	389	12	IPR007016	-	-	WzyC	b	D-Glcp	1,6	D-GlcpNAc
S. pneumoniae	CAI33169.1	spneumoniae_11c_cai33169.1	11C	389	12	IPR007016	-	-	WzyC	b	D-Glcp	1,6	D-Glcp
S. pneumoniae	CAI33188.1	spneumoniae_11d_cai33188.1	11D	390	12	IPR007016	-	PTHR37422	WzyC	b	D-Glcp	1,6	D-Glcp/D-GlcpNAc
S. pneumoniae	ADN28010.1	spneumoniae_11e_adn28010.1	11E	390	12	IPR007016	-	PTHR37422	WzyC	b	D-Glcp	1,6	D-Glcp
S. pneumoniae	CAI33207.1	spneumoniae_11f_cai33207.1	11F	390	12	IPR007016	-	PTHR37422	WzyC	b	D-Glcp	1,6	D-GlcpNAc
S. pneumoniae	CAI33226.1	spneumoniae_12a_cai33226.1	12A	403	12	IPR007016	-	PTHR37422	WzyC	b	D-GlcpNAc	1,4	D-ManpNAcA
S. pneumoniae	CAI33252.1	spneumoniae_12b_cai33252.1	12B	403	12	IPR007016	-	PTHR37422	WzyC	-	-	-	-
S. pneumoniae	CAI33278.1	spneumoniae_12f_cai33278.1	12F	403	12	IPR007016	-	PTHR37422	WzyC	b	D-GalpNAc	1,4	D-ManpNAcA
S. pneumoniae	CAI33343.1	spneumoniae_15a_cai33343.1	15A	399	12	-	-	-	WzyC	b	D-Glcp	1,3	D-Galp
S. pneumoniae	CAI33366.1	spneumoniae_15b_cai33366.1	15B	390	12	-	-	-	WzyC	b	D-Glcp	1,6	D-GlcpNAc
S. pneumoniae	CAI33389.1	spneumoniae_15c_cai33389.1	15C	390	12	-	-	-	WzyC	b	D-Glcp	1,6	D-GlcpNAc
S. pneumoniae	CAI33412.1	spneumoniae_15f_cai33412.1	15F	403	12	-	-	-	WzyC	b	D-Glcp	1,3	D-Galp
S. pneumoniae	CAI33441.1	spneumoniae_16a_cai33441.1	16A	401	12	-	-	-	WzyC	b	D-Glcp	1,3	D-Galf
S. pneumoniae	CAI33466.1	spneumoniae_16f_cai33466.1	16F	420	12	-	-	-	WzyC	b	D-Glcp	1,3	L-Rhap
S. pneumoniae	CAI33491.1	spneumoniae_17a_cai33491.1	17A	385	12	IPR007016	-	-	WzyC	b	D-Glcp	1,3	D-Galp
S. pneumoniae	CAI33515.1	spneumoniae_17f_cai33515.1	17F	397	12	IPR007016	-	PTHR37422	WzyC	b	D-Glcp	1,3	D-Galp
S. pneumoniae	CAI33537.1	spneumoniae_18a_cai33537.1	18A	423	12	IPR007016	-	-	WzyC	b	D-Glcp	1,4	D-Galp
S. pneumoniae	CAI33561.1	spneumoniae_18b_cai33561.1	18B	424	12	IPR007016	-	-	WzyC	b	D-Glcp	1,4	D-Galp
S. pneumoniae	CAI33585.1	spneumoniae_18c_cai33585.1	18C	424	12	IPR007016	-	-	WzyC	b	D-Glcp	1,4	D-Galp
S. pneumoniae	CAI33610.1	spneumoniae_18f_cai33610.1	18F	424	12	IPR007016	-	-	WzyC	b	D-Glcp	1,4	D-Galp
S. pneumoniae	CAI33631.1	spneumoniae_19a_cai33631.1	19A	444	11	-	TIGR04370	-	WzyB	a	D-Glcp	1,3	L-Rhap
S. pneumoniae	CAI33652.1	spneumoniae_19b_cai33652.1	19B	414	12	-	-	-	WzyC	b	D-Glcp	1,4	D-ManpNAc
S. pneumoniae	CAI33675.1	spneumoniae_19c_cai33675.1	19C	414	12	-	-	-	WzyC	b	D-Glcp	1,4	D-ManpNAc
S. pneumoniae	CAI33700.1	spneumoniae_19f_cai33700.1	19F	445	11	-	TIGR04370	-	WzyB	a	D-Glcp	1,2	L-Rhap
S. pneumoniae	CAI33718.1	spneumoniae_20a_cai33718.1	20A	355	12	IPR049458	-	-	WzyA	b	D-Glcp	1,3	D-GlcpNAc
S. pneumoniae	AFN40464.1	spneumoniae_20b_afn40464.1	20B	355	12	IPR049458	-	-	WzyA	b	D-Glcp	1,3	D-GlcpNAc
S. pneumoniae	CAI33774.1	spneumoniae_22a_cai33774.1	22A	426	11	-	TIGR04370	-	WzyB	-	-	-	-
S. pneumoniae	CAI33798.1	spneumoniae_22f_cai33798.1	22F	426	11	-	TIGR04370	-	WzyB	a	D-Glcp	1,3	D-Galf
S. pneumoniae	CAI33817.1	spneumoniae_23a_cai33817.1	23A	468	14	-	-	-	WzyC	b	D-Glcp	1,3	L-Rhap
S. pneumoniae	CAI33840.1	spneumoniae_23b_cai33840.1	23B	395	12	-	NF041436	-	WzyC	b	D-Glcp	1,4	D-Galp
S. pneumoniae	CAI33862.1	spneumoniae_23f_cai33862.1	23F	397	12	-	NF041436	-	WzyC	b	D-Glcp	1,4	D-Galp
S. pneumoniae	CAI33890.1	spneumoniae_24a_cai33890.1	24A	416	12	-	-	-	WzyC	b	D-Glcp	1,4	D-GlcpNAc
S. pneumoniae	CAI33915.1	spneumoniae_24b_1_cai33915.1	24B_1	416	12	-	-	-	WzyC	b	D-Glcp	1,4	D-GlcpNAc
S. pneumoniae	UP74135.1	spneumoniae_24c_24x_up74135.1	24C	416	12	-	-	-	WzyC	b	D-Glcp	1,4	D-GlcpNAc
S. pneumoniae	CAI33941.1	spneumoniae_24f_1_cai33941.1	24F_1	416	12	-	-	-	WzyC	b	D-Glcp	1,4	D-GlcpNAc
S. pneumoniae	CAI33966.2	spneumoniae_25a_cai33966.2	25A	476	12	IPR029468	TIGR04370	-	WzyB	-	-	-	-
S. pneumoniae	CAI33983.1	spneumoniae_25f_cai33983.1	25F	476	12	IPR029468	TIGR04370	-	WzyB	-	-	-	-
S. pneumoniae	CAI34032.1	spneumoniae_28a_cai34032.1	28A	410	12	IPR007016	-	-	WzyC	b	D-Glcp	1,4	D-Glcp
S. pneumoniae	CAI34057.2	spneumoniae_28f_cai34057.2	28F	410	12	IPR007016	-	-	WzyC	b	D-Glcp	1,4	D-Glcp
S. pneumoniae	CAI34124.1	spneumoniae_32a_cai34124.1	32A	411	12	-	-	-	WzyC	b	D-Glcp	1,3	D-Glcp
S. pneumoniae	CAI34150.1	spneumoniae_32f_cai34150.1	32F	411	12	-	-	-	WzyC	b	D-Glcp	1,3	D-Glcp
S. pneumoniae	CAI34177.1	spneumoniae_33a_cai34177.1	33A	407	12	IPR007016	-	-	WzyC	b	D-Glcp	1,5	D-Galf
S. pneumoniae	CAI34198.1	spneumoniae_33b_cai34198.1	33B	402	12	-	-	-	WzyC	b	D-Glcp	1,5	D-Galf
S. pneumoniae	CAI34217.1	spneumoniae_33c_cai34217.1	33C	410	12	-	-	-	WzyC	b	D-Galp	1,5	D-Galf
S. pneumoniae	CAI34236.1	spneumoniae_33d_cai34236.1	33D	402	12	-	-	-	WzyC	b	D-Glcp	1,5	D-Galf
S. pneumoniae	CAI34254.1	spneumoniae_33f_cai34254.1	33F	407	12	IPR007016	-	-	WzyC	b	D-Glcp	1,5	D-Galf
S. pneumoniae	WNT95670.1	spneumoniae_33g_wnt95670.1	33G	397	12	-	-	-	WzyC	b	D-Glcp	1,5	D-Galf
S. pneumoniae	CAI34286.1	spneumoniae_35a_cai34286.1	35A	397	12	-	-	-	WzyC	b	D-Glcp	1,6	D-Galf
S. pneumoniae	CAI34310.1	spneumoniae_35b_cai34310.1	35B	409	12	-	-	-	WzyC	b	D-Glcp	1,6	D-Galf
S. pneumoniae	CAI34328.1	spneumoniae_35c_cai34328.1	35C	397	12	-	-	-	WzyC	b	D-Glcp	1,6	D-Galf
S. pneumoniae	AQS23546.1	spneumoniae_35d_aqs23546.1	35D	409	12	-	-	-	WzyC	b	D-Glcp	1,6	D-Galf
S. pneumoniae	CAI34348.1	spneumoniae_35f_cai34348.1	35F	406	12	-	-	-	WzyC	b	D-Galp	1,6	D-Galf
S. pneumoniae	CAI34475.1	spneumoniae_41a_cai34475.1	41A	419	12	IPR007016	-	PTHR37422	WzyC	b	D-Glcp	1,3	D-Glcp
S. pneumoniae	CAI34498.1	spneumoniae_41f_cai34498.1	41F	419	12	IPR007016	-	PTHR37422	WzyC	b	D-Glcp	1,3	D-Glcp
S. pneumoniae	CAI34641.1	spneumoniae_47a_cai34641.1	47A	362	12	-	-	-	WzyC	b	D-Glcp	1,4	D-GlcpNAc
S. pneumoniae	CAI34657.1	spneumoniae_47f_cai34657.1	47F	406	12	-	-	-	WzyC	b	D-Galp	1,6	D-Galf
S. pneumoniae	CAI32823.1	spneumoniae_6a_cai32823.1	6A	447	11	-	TIGR04370	-	WzyB	a	D-Glcp	1,3	L-Rhap
S. pneumoniae	CAI32843.1	spneumoniae_6b_cai32843.1	6B	447	11	-	TIGR04370	-	WzyB	a	D-Glcp	1,3	L-Rhap
S. pneumoniae	AEO88686.1	spneumoniae_6c_aeo88686.1	6C	445	11	-	TIGR04370	-	WzyB	a	D-Glcp	1,3	L-Rhap
S. pneumoniae	ADO95346.1	spneumoniae_6d_ado95346.1	6D	447	11	-	TIGR04370	-	WzyB	a	D-Glcp	1,3	L-Rhap
S. pneumoniae	SBT85383.1	spneumoniae_6e_sbt85383.1	6E	447	11	-	TIGR04370	-	WzyB	-	-	-	-
S. pneumoniae	AHF51336.1	spneumoniae_6f_ahf51336.1	6F	447	11	-	TIGR04370	-	WzyB	a	D-Glcp	1,3	L-Rhap
S. pneumoniae	AHF51351.1	spneumoniae_6g_ahf51351.1	6G	447	11	-	TIGR04370	-	WzyB	a	D-Glcp	1,3	L-Rhap
S. pneumoniae	CAI32867.1	spneumoniae_7a_cai32867.1	7A	483	14	-	-	-	WzyC	b	D-Glcp	1,3	D-GalpNAc
S. pneumoniae	CAI32889.1	spneumoniae_7b_cai32889.1	7B	415	12	-	-	-	WzyC	b	D-Glcp	1,4	D-Glcp
S. pneumoniae	CAI32910.1	spneumoniae_7c_cai32910.1	7C	415	12	-	-	-	WzyC	b	D-Glcp	1,4	D-GalpNAc
S. pneumoniae	CAI32935.1	spneumoniae_7f_cai32935.1	7F	483	14	-	-	-	WzyC	b	D-Glcp	1,3	D-GalpNAc
S. pneumoniae	CAI32973.1	spneumoniae_9a_cai32973.1	9A	379	12	IPR007016	-	PTHR37422	WzyC	b	D-Glcp	1,4	D-Glcp
S. pneumoniae	CAI32993.1	spneumoniae_9l_cai32993.1	9L	379	12	IPR007016	-	PTHR37422	WzyC	b	D-Glcp	1,4	D-GlcpNAc
S. pneumoniae	CAI33011.1	spneumoniae_9n_cai33011.1	9N	379	12	IPR007016	-	PTHR37422	WzyC	b	D-Glcp	1,4	D-GlcpNAc
S. pneumoniae	CAI33029.1	spneumoniae_9v_cai33029.1	9V	380	12	IPR007016	-	PTHR37422	WzyC	b	D-Glcp	1,4	D-Glcp
Y. pseudotuberculosis	ADX97403.1	ypseudotuberculosis_o10_adx97403.1	O:10	347	11	-	-	-	WzyC	b	D-GalpNAc	1,4	D-Glcp
Y. pseudotuberculosis	ACV52983.1	ypseudotuberculosis_o11_acv52983.1	O:11	406	10	-	-	NF033860	WzyB	a	D-GlcpNAc	1,2	D-Manp
Y. pseudotuberculosis	AFV46136.1	ypseudotuberculosis_o12_afv46136.1	O:12	363	12	IPR049458	-	-	WzyA	b	D-GlcpNAc	1,3	D-Galp
Y. pseudotuberculosis	CAX18360.1	ypseudotuberculosis_o15_cax18360.1	O:15	404	11	-	-	-	WzyB	a	D-GalpNAc	1,2	L-Fucp
Y. pseudotuberculosis	AAN23041.1	ypseudotuberculosis_o1a_aan23041.1	O:1a	361	10	-	-	-	WzyA	b	D-GlcpNAc	1,3	D-Galp
Y. pseudotuberculosis	CAB63298.1	ypseudotuberculosis_o1b_cab63298.1	O:1b	406	10	-	-	NF033860	WzyB	a	D-GlcpNAc	1,2	D-Manp
Y. pseudotuberculosis	ADI59429.1	ypseudotuberculosis_o1c_adi59429.1	O:1c	450	13	-	-	-	WzyC	b	D-GalpNAc	1,2	D-Manp
Y. pseudotuberculosis	AAN23078.1	ypseudotuberculosis_o2a_aan23078.1	O:2a	361	10	-	-	-	WzyA	b	D-GlcpNAc	1,3	D-Galp
Y. pseudotuberculosis	ADI59445.1	ypseudotuberculosis_o2b_adi59445.1	O:2b	450	13	-	-	-	WzyC	b	D-GalpNAc	1,2	D-Manp
Y. pseudotuberculosis	AKA20935.1	ypseudotuberculosis_o2c_aka20935.1	O:2c	432	12	-	-	-	WzyB	a	D-GalpNAc	1,6	D-Manp
Y. pseudotuberculosis	AJJ60823.1	ypseudotuberculosis_o3_ajj60823.1	O:3	419	10	-	-	NF033860	WzyB	a	D-GalpNAc	1,2	D-Manp
Y. pseudotuberculosis	AKA20966.1	ypseudotuberculosis_o4a_aka20966.1	O:4a	432	12	-	-	-	WzyB	a	D-GlcpNAc	1,6	D-Manp
Y. pseudotuberculosis	AAN23057.1	ypseudotuberculosis_o4b_aan23057.1	O:4b	361	10	-	-	-	WzyA	b	D-GlcpNAc	1,3	D-Galp
Y. pseudotuberculosis	AKA20981.1	ypseudotuberculosis_o5a_aka20981.1	O:5a	404	11	-	-	-	WzyB	a	D-GalpNAc	1,2	L-Fucp
Y. pseudotuberculosis	AKA20999.1	ypseudotuberculosis_o5b_aka20999.1	O:5b	407	11	-	-	-	WzyB	a	D-GalpNAc	1,2	L-Fucp
Y. pseudotuberculosis	AEP25500.1	ypseudotuberculosis_o6_aep25500.1	O:6	329	11	-	-	-	WzyA	b	D-GalpNAc	1,3	D-GlcpNAc
Y. pseudotuberculosis	AEP25477.1	ypseudotuberculosis_o7_aep25477.1	O:7	398	12	-	-	PTHR37422	WzyC	b	D-GalpNAc	1,6	D-Glcp
Y. pseudotuberculosis	CDF66396.1	ypseudotuberculosis_o9_cdf66396.1	O:9	437	12	-	-	-	WzyB	a	D-GlcpNAc	1,4	D-GlcNAcA

## Sheet: TABLE_S2
Supplementary Table 2. Information on ligase sequences used in this study
Genus/species/complex	Protein	NCBI accession no.	Length	No. of TMS	Pfam (Interproscan)
Acinetobacter baumannii	PglL	WP_272749414.1	542	12	PF15864; PF04932
Acinetobacter baumannii	TfpO	WP_000914629.1	436	13	PF04932
Neisseria meningitidis	PglL	AEK98518.1	604	13	PF04932
Vibrio cholerae	PglL	WP_001883229.1	597	13	PF15864; PF04932
Escherichia coli	WaaL-R1	AAC69682.1	417	10	PF04932
Escherichia coli	WaaL-R2	AAC69661.1	402	11	PF04932
Escherichia coli	WaaL-R3	AAC69648.1	405	8	PF04932
Escherichia coli	WaaL-R4	AAC69671.1	417	10	PF04932
Escherichia coli	WaaL-R5	NP_418079.1	419	12	PF04932
Vibrio cholerae	WaaL	AAL76926.1	399	11	PF04932
Pseudomonas aeruginosa	WaaL	AAG08384.1	401	11	PF04932
Cupriavidus metallidurans	WaaL	Q1LJU1	413	10	PF04932
Cupriavidus metallidurans	ArnT	Q1LDT6	575	11	PF13231; PF18583
Klebsiella pneumoniae	WaaL	AAD37765.1	360	9	PF04932
Myxococcus xanthus	WaaL	ABF89195.1	441	8	PF04932
Proteus mirabilis	WaaL	CAR46213.1	422	12	PF04932

## Sheet: TABLE_S3
Supplementary Table 3. Results of genome screening using novel HMMs
Isolate	NCBI accession number	K type	K locus	Reference (supplementary list)	Wzy encoded at K locus	HMM	Bitscore	PglL	HMM	Bitscore	TfpO	HMM	Bitscore	Other_1	HMM	Bitscore	Other_2	HMM	Bitscore
AB307-0294	GCA_002803025.2	K1	KL1	1	ATY45828.1	WzyC	87.4	ATY42800.1	WzyC	85.5	-	-	-	-	-	-	-	-	-
MG1	GCA_053203005.1	K1	KL1	2	MGT2613163.1	WzyC	87.4	MGT2611904.1	WzyC	85.5	-	-	-	-	-	-	-	-	-
MRSN 31196	GCA_006491855.1	K1-GI1	KL1+GI1	3	-	-	-	TPT63000.1	WzyC	85.5	-	-	-	TPT61979.1	WzyC	104.9	-	-	-
ACICU	GCA_005519135.2	K2	KL2	4	QCS00480.1	WzyA	156.5	QCS03710.1	WzyC	84.2	QCS03711.1	WzyC	95.8	-	-	-	-	-	-
A74	GCA_900118105.2	K2	KL2	5	WP_000171934.1	WzyA	156.5	WP_001988049.1	WzyC	83.1	WP_000914629.1	WzyC	96.3	-	-	-	-	-	-
SMAL2002	GCA_030345675.1	K3	KL3	2	MDM4701719.1	WzyA	185.5	MDM4702854.1	WzyC	82.7	MDM4702855.1	WzyC	95	-	-	-	-	-	-
ATCC 17978-mff	GCA_001077675.1	K3	KL3	6	AKQ28521.1	WzyA	185.5	AKQ25479.1	WzyC	83.1	-	-	-	-	-	-	-	-	-
NIH1	GCA_046097185.1	K3	KL3	7	XLN39368.1	WzyA	185.5	XLN39010.1	WzyC	84	-	-	-	-	-	-	-	-	-
15827	GCA_000682315.1	K3	KL22	7	KCX90783.1	WzyA	185.5	KCX90366.1	WzyC	84	-		-	-	-	-	-	-	-
LUH5537	GCA_046097165.1	K3	KL22	8	XLN32005.1	WzyA	185.5	XLN32367.1	WzyC	84	-	-	-	-	-	-	-	-	-
AB5001	GCA_001612395.1	K3-v1	KL3	9	KZA82009.1	WzyA	185.5	KZA84868.1	WzyC	83.1	KZA84869.1	WzyC	96.3	-	-	-	-	-	-
HUMC1	GCA_046097205.1	K3-v1	KL22	7	XLN48350.1	WzyA	185.5	XLN48713.1	WzyC	84	-	-	-	-	-	-	-	-	-
D78	GCA_001511915.1	K4	KL4	10	WP_071543527.1	WzyB	169.3	WP_001195775.1	WzyC	85.5	-	-	-	-	-	-	-	-	-
SDF	GCA_000069205.1	K5	KL5+atr30	11	WP_001009622.1	WzyA	116.5	WP_001195773.1	WzyC	83.9	-	-	-	-	-	-	-	-	-
RBH4	GCA_022869505.1	K6	KL6	12	WP_000631584.1	WzyB	108.8	WP_001988049.1	WzyC	83.1	WP_000914629.1	WzyC	96.3	-	-	-	-	-	-
LUH5533	DRS005660	K7	KL7	13	LUH5533_DRR006297_02530	WzyA	111.5	LUH5533_DRR006297_00852	WzyC	84.2	-	-	-	-	-	-	-	-	-
BAL097	ERR190420	K8	KL8	14	KICGKECG_02414	WzyA	121.1	KICGKECG_02155	WzyC	84.8	KICGKECG_02154	WzyC	90.3	-	-	-	-	-	-
LUH3484	DRS005649	K9	KL9	15	LUH3484_00928	WzyA	93.5	LUH3484_00713	WzyC	83.1	LUH3484_00714	WzyC	96.3	-	-	-	-	-	-
LUH5545	DRS005636	K11	KL11	16	KMFHGCMN_02554	WzyA	195.5	KMFHGCMN_01406	WzyC	85.6	-	-	-	-	-	-	-	-	-
D36	GCA_001399655.1	K12	KL12	17	ALJ89750.1	WzyB	207.8	ALJ86325.1/ALJ86326.1	WzyC	38.3/40.0	-	-	-	-	-	-	-	-	-
UMB001	GCA_046097175.1	K13	KL13	18	XLN36995.1	WzyB	83.9	XLN36624.1	WzyC	84	-	-	-	-	-	-	-	-	-
D46	GCA_018831125.1	K14	KL14	19	QUV67884.1	WzyB	230	QUV71269.1	WzyC	83.7	-	-	-	-	-	-	-	-	-
LUH5554	DRS005647	K15	KL15	20	BJPLHFDA_00282	WzyB	131.6	BJPLHFDA_00680	WzyC	88	-	-	-	-	-	-	-	-	-
D4	GCA_018808925.1	K16	KL16	21	QUX85956.1	WzyC	107.8	QUX89390.1	WzyC	83.7	-	-	-	-	-	-	-	-	-
G7	GCA_001512195.1	K17	KL17	22	XLN45647.1	WzyB	127.4	XLN45275.1	WzyC	85.5	-	-	-	XLN44433.1	WzyA	84.3	-	-	-
RBH2	GCA_026062515.1	K19	KL19+GI1	23	-	-	-	UZG61955.1	WzyC	85.4	-	-	-	UZG61515.2	WzyC	104.9	-	-	-
A388	GCA_002741415.1	K20	KL20	24	ATP85345.1	WzyC	137.4	ATP85606.1	WzyC	85.5	-	-	-	-	-	-	-	-	-
G21	GCA_900476595.2	K21	KL21	24	WP_111896350.1	WzyC	129.3	WP_001195775.1	WzyC	85.5	-	-	-	-	-	-	-	-	-
RCH51	GCA_900477915.2	K24	KL24+GI2	25	-	-	-	WP_031999632.1	WzyC	84.6	WP_057048756.1	WzyC	90.1	WP_001088949.1	WzyA	87.2	-	-	-
AB5075-UW	GCA_000963815.1	K25	KL25	26	AKA33495.1	WzyB	189	AKA30091.1	WzyC	85.5	-	-	-	-	-	-	-	-	-
4190	GCA_053202995.1	K27	KL27	27	MGT2582611.1	WzyA	113.1	MGT2579775.1	WzyC	81.8	-	-	-	-	-	-	-	-	-
NIPH190	GCA_000368525.1	K30	KL30	28	ENV24276.1	WzyC	144.5	ENV27581.1	WzyC	88.6	-	-	-	-	-	-	-	-	-
LUH5549	DRS005644	K32	KL32	29	LJDKFKED_00908	WzyA	167.5	LJDKFKED_00133	WzyC	83.4	-	-	-	-	-	-	-	-	-
NIPH67	GCA_000369265.1	K33	KL33	30	ENW48388.1	WzyB	150.3	ENW53995.1	WzyC	86.7	ENW53994.1	WzyC	83.5	-	-	-	-	-	-
LUH5535	GCA_051674525.1	K35	KL35	20	XXW21071.1	WzyA	46.5	XXW20696.1	WzyC	83.9	-	-	-	-	-	-	-	-	-
NIPH146	GCA_000368185.1	K37	KL37	31	ENU67364.1	WzyA	184.5	ENU67780.1	WzyC	83.7	-	-	-	-	-	-	-	-	-
LUH5550	DRS005635	K42	KL42	32	LIBEOGPM_01494	WzyA	119.9	LIBEOGPM_00056	WzyC	84.2	LIBEOGPM_00055	WzyC	95.8	-	-	-	-	-	-
NIPH60	GCA_000368545.1	K43	KL43	33	ENV28483.1	WzyB	206.4	ENV28292.1	WzyC	83.3	ENV28293.1/ENV28295.1	WzyC	41.5/28.0	-	-	-	-	-	-
NIPH70	GCA_000369305.1	K44	KL44	27	ENW58320.1	WzyC	67.3	ENW65477.1	WzyC	84.2	ENW65476.1	WzyC	97.3	-	-	-	-	-	-
NIPH201	GCA_000369165.1	K45	KL45	28	ENW33214.1	WzyB	177.2	ENW38954.1	WzyC	83.1	ENW38953.1	WzyC	80.1	-	-	-	-	-	-
NIPH 329	GCA_000369225.1	K46	KL46+atr29-Ph	34	ENW42231.1	WzyA	118	ENW47549.1	WzyC	84	-	-	-	-	-	-	-	-	-
NIPH601	GCA_000369245.1	K47	KL47	33	ENW49797.1	WzyB	211.4	ENW54970.1	WzyC	84.3	ENW54969.1	WzyC	94.4	-	-	-	-	-	-
NIPH615	GCA_000368205.1	K48	KL48	28	ENU71480.1	WzyA	93.5	ENU71105.1	WzyC	84.3	ENU71104.1	WzyC	95	-	-	-	-	-	-
LAC-4	GCA_000786735.1	K49	KL49	35	AIY39054.1	WzyB	74.1	AIY35677.1	WzyC	84.8	AIY35676.1	WzyC	85.2	-	-	-	-	-	-
NL6	GCA_050971825.1	K49	KL49	36	MGI8319812.1	WzyB	101.5	MGI8317991.1	WzyC	84.8	MGI8317990.1	WzyC	85.2	-	-	-	-	-	-
LUH5546	GCA_051805485.1	K52	KL52	37	XXW28047.1	WzyA	166.1	XXW27659.1	WzyC	83.4	-	-	-	XXW26805.1	WzyA	86.4	-	-	-
D23	GCA_900477875.2	K53	KL53	38	WP_111847989.1	WzyA	109.4	WP_111849826.1	WzyC	42.6	-	-	-	-	-	-	-	-	-
RCH52	GCA_020810655.1	K54	KL54	14	UDY18509.1	WzyA	128.3	UDY21832.1	WzyC	83.7	-	-	-	-	-	-	-	-	-
BAL204	ERR190441	K55	KL55	39	JJCGPEPA_02892	WzyA	125	JJCGPEPA_01164	WzyC	84.2	JJCGPEPA_01163	WzyC	95.8	-	-	-	-	-	-
BAL212	ERR190446	K57	KL57	40	KIMCFELK_01550	WzyB	75.8	KIMCFELK_00044	WzyC	81.4	KIMCFELK_00045	WzyC	89.8	-	-	-	-	-	-
MRSN 31468	GCA_051521805.1	K58	KL58+atr44	41,42	XXW17469.1	WzyA	157	XXW17086.1	WzyC	84.1	-	-	-	-	-	-	-	-	-
BAL062	GCA_900088705.1	K58e	KL58+epaAB	43	SBS23904.1	WzyA	157	SBS20439.1	WzyC	83.1	SBS20438.1	WzyC	96.3	-	-	-	-	-	-
BAL114	GCA_046097545.1	K58-WzyPh	KL58+wzy1Ph+wzy2Ph	44	XLO27997.1	WzyA	77.3	XLO28355.1	WzyC	83.1	XLO28354.1	WzyC	96.3	XLO26690.1	WzyA	157.1	XLO29423.1	WzyC	86.4
LUH5551	GCA_051805475.1	K63	KL63	45	XXW24486.1	WzyB	112.8	XXW24128.1	WzyC	84.2	-	-	-	-	-	-	-	-	-
SGH0807	GCA_003020405.2	K70	KL70	15	MDP4316812.1	WzyA	93.5	MDP4313850.1	WzyC	85.5	-	-	-	-	-	-	-	-	-
48_n	GCA_033843175.1	K71	KL71	46	MDX6035037.1	WzyA	142.7	MDX6035912.1	WzyC	84	MDX6035911.1	WzyC	89.7	-	-	-	-	-	-
SGH0703	GCA_900118095.2	K73	KL73	18	WP_071713604.1	WzyB	89.3	WP_001988049.1	WzyC	83.1	WP_000914629.1	WzyC	96.3	-	-	-	-	-	-
BAL309	ERR190476	K74	KL74	39	JDMJOPHN_01690	WzyA	149.6	JDMJOPHN_01165	WzyC	84	JDMJOPHN_01164	WzyC	89.7	-	-	-	-	-	-
LUH3714	DRS005651	K80	KL80	47	FFEMEOPA_02237	WzyA	211.4	FFEMEOPA_00255	WzyC	83.4	-	-	-	-	-	-	-	-	-
LUH5534	DRS005641	K82	KL82	48	GBOMJNKA_02625	WzyC	112.8	GBOMJNKA_02998	WzyC	84.9	-	-	-	-	-	-	-	-	-
LUH5538	DRS005645	K83	KL83	16	JIBOCNEN_01588	WzyA	159	JIBOCNEN_00601	WzyC	81.4	JIBOCNEN_00600	WzyC	91.9	-	-	-	-	-	-
LUH5540	DRS005634	K84	KL84	49	NHEFOEAM_00882	WzyB	109.6	NHEFOEAM_00434	WzyC	84.1	NHEFOEAM_00433	WzyC	92.7	-	-	-	-	-	-
LUH5543	DRS005653	K85	KL85	39	FHCIEMCG_01650	WzyA	148.2	FHCIEMCG_01328	WzyC	84.2	FHCIEMCG_01329	WzyC	96.9	-	-	-	-	-	-
LUH5547	DRS005658	K87	KL87	50	GBHGAFNK_00883	WzyA	136.1	GBHGAFNK_01395	WzyC	136.1	-	-	-	-	-	-	-	-	-
LUH5548	DRS005650	K88	KL88	33	DELBECGM_02377	WzyA	91.5	DELBECGM_00782	WzyC	85.9	DELBECGM_00781	WzyC	83.8	-	-	-	-	-	-
LUH5552	DRS005659	K89	KL89	51	NBCCPDHM_00826	WzyA	242.3	NBCCPDHM_00204	WzyC	85.9	NBCCPDHM_00205	WzyC	84.4	-	-	-	-	-	-
LUH5553	DRS005657	K90	KL90	52	CKGAIAPC_02218	WzyA	211.9	CKGAIAPC_00988	WzyC	82.7	CKGAIAPC_00989	WzyC	86.1	-	-	-	-	-	-
B8300	GCA_001077965.2	K92	KL92	53	KMV26001.1	WzyC	109	KMV26410.1	WzyC	84.3	KMV26409.1	WzyC	94.1	-	-	-	-	-	-
B11911	GCA_001077565.2	K93	KL93	54	KMV04424.1	WzyA	155	KMV04052.1	WzyC	84	-	-	-	-	-	-	-	-	-
MAR18-2212	GCA_041079425.1	K95	KL95	55	MEX8154540.1	WzyC	143.6	MEX8153864.1	WzyC	84.3	MEX8153863.1	WzyC	94.7	-	-	-	-	-	-
MAR 20-4513	GCA_040829905.1	K104	KL104	56	MDO3668705.1	WzyA	164.2	MDO3668871.1	WzyC	83.8	-	-	-	-	-	-	-	-	-
MAR 21-2688	GCA_052220845.1	K111	KL111	57	MGP3307195.1	WzyA	126.6	MGP3307034.1	WzyC	82.7	-	-	-	-	-	-	-	-	-
MAR-303	GCA_024742175.1	K116	KL116	31	MCR8954717.1	WzyA	187.2	MCR8952891.1	WzyC	84.3	MCR8952892.1	WzyC	95	-	-	-	-	-	-
KZ-1257	GCA_022699685.1	K127	KL127	58	MCI3939977.1	WzyA	119.5	MCI3939685.1	WzyC	88.4	-	-	-	-	-	-	-	-	-
36-1354	GCA_019192905.1	K127-WzyPh	KL127+wzy1Ph	58	WP_218229482.1	WzyA	121.3	WP_002062192.1	WzyC	84.1	WP_002062173.1	WzyC	92.7	WP_218229305.1	WzyA	157	-	-	-
KZ-1093	GCA_020532025.1	K128	KL128	59	MCB5210084.1	WzyA	119.5	MCB5208680.1	WzyC	84.3	MCB5208679.1	WzyC	94.7	-	-	-	-	-	-
MAR15-4076	GCA_040838245.1	K129	KL129	49	MEX0442249.1	WzyA	113.4	MEX0441328.1	WzyC	83.4	-	-	-	-	-	-	-	-	-
RES-546	GCA_023516475.1	K135	KL135	60	MCL6695760.1	WzyA	224	MCL6693748.1	WzyC	84.5	-	-	-	-	-	-	-	-	-
KZ-1106	GCA_030519555.1	K141	KL141	61	MDO3668705.1	WzyA	164.2	MDO3668871.1	WzyC	83.8	-	-	-	-	-	-	-	-	-
52-249	GCA_044628175.1	K218	KL218	62	MFJ1478113.1	WzyA	115.1	MFJ1476777.1	WzyC	84.1	MFJ1476778.1	WzyC	85.1	-	-	-	-	-	-
MAR19-4435	GCA_028655715.1	K239	KL239		MDD1365388.1	WzyC	104.5	MDD1363952.1	WzyC	84	MDD1363953.1	WzyC	89.7	-	-	-	-	-	-

## Sheet: TABLE_S4
Supplementary Table 4. Alphafold3 metrics for modelled structures
ID	fraction_disordered	has_clash	ptm	ranking_score
abaumannii_gi1	0	0	0.92	0.92
abaumannii_gi2	0.05	0	0.92	0.94
abaumannii_kl1	0	0	0.85	0.85
abaumannii_kl10	0.02	0	0.92	0.93
abaumannii_kl100	0	0	0.91	0.91
abaumannii_kl101	0	0	0.92	0.92
abaumannii_kl102	0	0	0.94	0.94
abaumannii_kl103	0	0	0.92	0.92
abaumannii_kl104	0	0	0.92	0.92
abaumannii_kl105	0	0	0.92	0.92
abaumannii_kl106	0	0	0.91	0.91
abaumannii_kl107	0	0	0.86	0.86
abaumannii_kl108	0	0	0.93	0.93
abaumannii_kl109	0.01	0	0.87	0.88
abaumannii_kl11	0	0	0.94	0.94
abaumannii_kl110	0	0	0.92	0.92
abaumannii_kl111	0	0	0.91	0.91
abaumannii_kl112	0	0	0.91	0.91
abaumannii_kl113	0	0	0.93	0.93
abaumannii_kl114	0.01	0	0.9	0.91
abaumannii_kl115	0.04	0	0.91	0.93
abaumannii_kl116	0	0	0.94	0.94
abaumannii_kl117	0	0	0.89	0.89
abaumannii_kl118	0	0	0.87	0.87
abaumannii_kl119	0	0	0.93	0.93
abaumannii_kl12	0	0	0.93	0.93
abaumannii_kl120	0	0	0.91	0.91
abaumannii_kl121	0	0	0.91	0.91
abaumannii_kl122	0	0	0.95	0.95
abaumannii_kl123	0	0	0.94	0.94
abaumannii_kl124	0	0	0.93	0.93
abaumannii_kl125	0	0	0.91	0.91
abaumannii_kl126	0	0	0.9	0.9
abaumannii_kl127	0	0	0.93	0.93
abaumannii_kl128	0	0	0.92	0.92
abaumannii_kl129	0.03	0	0.9	0.92
abaumannii_kl13	0	0	0.86	0.86
abaumannii_kl130	0	0	0.93	0.93
abaumannii_kl131	0	0	0.91	0.91
abaumannii_kl132	0.03	0	0.91	0.92
abaumannii_kl133	0	0	0.92	0.92
abaumannii_kl134-1	0	0	0.87	0.87
abaumannii_kl134-2	0	0	0.91	0.91
abaumannii_kl135	0	0	0.94	0.94
abaumannii_kl136	0	0	0.92	0.92
abaumannii_kl137	0.03	0	0.91	0.93
abaumannii_kl138	0	0	0.94	0.94
abaumannii_kl139	0	0	0.89	0.89
abaumannii_kl14	0	0	0.89	0.89
abaumannii_kl140	0.02	0	0.85	0.86
abaumannii_kl141	0	0	0.93	0.93
abaumannii_kl142	0.04	0	0.91	0.93
abaumannii_kl143	0.03	0	0.93	0.94
abaumannii_kl144	0.03	0	0.9	0.91
abaumannii_kl145	0.02	0	0.86	0.87
abaumannii_kl146	0	0	0.91	0.91
abaumannii_kl147	0.03	0	0.92	0.93
abaumannii_kl148	0	0	0.91	0.91
abaumannii_kl149	0.01	0	0.87	0.88
abaumannii_kl15	0.03	0	0.92	0.93
abaumannii_kl150	0.04	0	0.89	0.91
abaumannii_kl151	0	0	0.92	0.92
abaumannii_kl152	0	0	0.92	0.92
abaumannii_kl153	0	0	0.93	0.93
abaumannii_kl154	0	0	0.91	0.91
abaumannii_kl155	0	0	0.91	0.91
abaumannii_kl156	0	0	0.92	0.92
abaumannii_kl157	0	0	0.91	0.91
abaumannii_kl158	0	0	0.93	0.93
abaumannii_kl159	0.02	0	0.91	0.92
abaumannii_kl16	0.06	0	0.87	0.9
abaumannii_kl160	0	0	0.94	0.94
abaumannii_kl161	0	0	0.87	0.87
abaumannii_kl162	0	0	0.91	0.91
abaumannii_kl163	0.03	0	0.92	0.93
abaumannii_kl164	0	0	0.91	0.91
abaumannii_kl165	0	0	0.9	0.9
abaumannii_kl166	0.05	0	0.86	0.88
abaumannii_kl167	0.06	0	0.87	0.9
abaumannii_kl168	0.01	0	0.87	0.88
abaumannii_kl169	0	0	0.94	0.94
abaumannii_kl17	0	0	0.91	0.91
abaumannii_kl170	0	0	0.94	0.94
abaumannii_kl171	0.02	0	0.91	0.92
abaumannii_kl172	0	0	0.91	0.91
abaumannii_kl173	0.01	0	0.87	0.88
abaumannii_kl174	0.01	0	0.93	0.94
abaumannii_kl175	0	0	0.91	0.91
abaumannii_kl176	0	0	0.94	0.94
abaumannii_kl177	0	0	0.94	0.94
abaumannii_kl178	0	0	0.93	0.93
abaumannii_kl179	0.03	0	0.9	0.91
abaumannii_kl18	0	0	0.91	0.91
abaumannii_kl180	0.01	0	0.92	0.93
abaumannii_kl181	0	0	0.93	0.93
abaumannii_kl182	0.01	0	0.91	0.92
abaumannii_kl183	0.02	0	0.88	0.89
abaumannii_kl184	0	0	0.91	0.91
abaumannii_kl185	0.06	0	0.89	0.92
abaumannii_kl186	0	0	0.89	0.89
abaumannii_kl187	0	0	0.91	0.91
abaumannii_kl188	0.06	0	0.9	0.93
abaumannii_kl189	0	0	0.93	0.93
abaumannii_kl190	0	0	0.92	0.92
abaumannii_kl191	0	0	0.92	0.92
abaumannii_kl192	0	0	0.92	0.92
abaumannii_kl193	0.02	0	0.91	0.92
abaumannii_kl194	0	0	0.92	0.92
abaumannii_kl195	0	0	0.94	0.94
abaumannii_kl196	0.04	0	0.91	0.93
abaumannii_kl197	0.02	0	0.91	0.93
abaumannii_kl198	0.03	0	0.9	0.91
abaumannii_kl199	0	0	0.93	0.93
abaumannii_kl2	0	0	0.94	0.94
abaumannii_kl20	0	0	0.93	0.93
abaumannii_kl200	0	0	0.91	0.91
abaumannii_kl201	0	0	0.9	0.9
abaumannii_kl202	0	0	0.93	0.93
abaumannii_kl203	0.05	0	0.87	0.9
abaumannii_kl204	0.04	0	0.9	0.92
abaumannii_kl205	0.01	0	0.92	0.93
abaumannii_kl206	0	0	0.93	0.93
abaumannii_kl207	0	0	0.89	0.89
abaumannii_kl208	0.03	0	0.87	0.89
abaumannii_kl209	0	0	0.9	0.9
abaumannii_kl21	0	0	0.93	0.93
abaumannii_kl210	0	0	0.91	0.91
abaumannii_kl211	0	0	0.93	0.93
abaumannii_kl212	0	0	0.93	0.93
abaumannii_kl213	0	0	0.91	0.91
abaumannii_kl214	0.03	0	0.9	0.92
abaumannii_kl215	0	0	0.92	0.92
abaumannii_kl216	0	0	0.94	0.94
abaumannii_kl217	0.02	0	0.88	0.89
abaumannii_kl218	0	0	0.91	0.91
abaumannii_kl219	0.02	0	0.91	0.92
abaumannii_kl22	0	0	0.93	0.93
abaumannii_kl220	0.03	0	0.9	0.92
abaumannii_kl221	0	0	0.92	0.92
abaumannii_kl222	0	0	0.92	0.92
abaumannii_kl223	0	0	0.91	0.91
abaumannii_kl224	0	0	0.94	0.94
abaumannii_kl225	0	0	0.94	0.94
abaumannii_kl226	0	0	0.88	0.88
abaumannii_kl227	0	0	0.91	0.91
abaumannii_kl228	0.02	0	0.89	0.9
abaumannii_kl229	0	0	0.92	0.92
abaumannii_kl23	0.03	0	0.89	0.91
abaumannii_kl230	0	0	0.92	0.92
abaumannii_kl231	0	0	0.93	0.93
abaumannii_kl232	0.02	0	0.9	0.91
abaumannii_kl233	0	0	0.9	0.9
abaumannii_kl234	0.02	0	0.88	0.89
abaumannii_kl235	0.02	0	0.89	0.9
abaumannii_kl236	0.02	0	0.9	0.91
abaumannii_kl237	0	0	0.91	0.91
abaumannii_kl238	0.01	0	0.93	0.93
abaumannii_kl239	0	0	0.91	0.91
abaumannii_kl240	0	0	0.92	0.92
abaumannii_kl241	0.02	0	0.88	0.89
abaumannii_kl25	0	0	0.9	0.9
abaumannii_kl26	0	0	0.91	0.91
abaumannii_kl27	0.02	0	0.92	0.93
abaumannii_kl28	0	0	0.94	0.94
abaumannii_kl29	0	0	0.94	0.94
abaumannii_kl3	0.02	0	0.91	0.92
abaumannii_kl30	0	0	0.92	0.92
abaumannii_kl31	0	0	0.92	0.92
abaumannii_kl32	0	0	0.91	0.91
abaumannii_kl33	0.02	0	0.89	0.9
abaumannii_kl34	0	0	0.93	0.93
abaumannii_kl35	0.06	0	0.88	0.91
abaumannii_kl36	0.03	0	0.91	0.92
abaumannii_kl37	0	0	0.93	0.93
abaumannii_kl38	0.03	0	0.9	0.92
abaumannii_kl4	0	0	0.93	0.93
abaumannii_kl40	0	0	0.92	0.92
abaumannii_kl41	0.02	0	0.93	0.94
abaumannii_kl42	0	0	0.94	0.94
abaumannii_kl43	0	0	0.91	0.91
abaumannii_kl44	0.02	0	0.91	0.92
abaumannii_kl45	0.04	0	0.9	0.92
abaumannii_kl46	0	0	0.91	0.91
abaumannii_kl47	0	0	0.93	0.93
abaumannii_kl48	0.01	0	0.92	0.92
abaumannii_kl49	0	0	0.92	0.92
abaumannii_kl5	0	0	0.91	0.91
abaumannii_kl50	0.03	0	0.91	0.92
abaumannii_kl51	0	0	0.92	0.92
abaumannii_kl52	0.04	0	0.91	0.93
abaumannii_kl53	0.01	0	0.87	0.88
abaumannii_kl54	0	0	0.91	0.91
abaumannii_kl55	0	0	0.91	0.91
abaumannii_kl56	0	0	0.94	0.94
abaumannii_kl57	0	0	0.9	0.9
abaumannii_kl58	0	0	0.94	0.94
abaumannii_kl59	0	0	0.93	0.93
abaumannii_kl6	0	0	0.9	0.9
abaumannii_kl60	0	0	0.93	0.93
abaumannii_kl61	0	0	0.93	0.93
abaumannii_kl62	0	0	0.92	0.92
abaumannii_kl63	0	0	0.92	0.92
abaumannii_kl64	0	0	0.94	0.94
abaumannii_kl65	0.03	0	0.89	0.91
abaumannii_kl66	0.03	0	0.9	0.92
abaumannii_kl67-1	0	0	0.87	0.87
abaumannii_kl67-2	0	0	0.92	0.92
abaumannii_kl68	0.02	0	0.91	0.92
abaumannii_kl69	0.01	0	0.92	0.93
abaumannii_kl7	0	0	0.94	0.94
abaumannii_kl70	0.01	0	0.87	0.88
abaumannii_kl71	0.03	0	0.9	0.92
abaumannii_kl72	0.04	0	0.91	0.93
abaumannii_kl73	0	0	0.86	0.86
abaumannii_kl74	0.03	0	0.92	0.93
abaumannii_kl75	0	0	0.92	0.92
abaumannii_kl76	0	0	0.92	0.92
abaumannii_kl77	0.02	0	0.89	0.9
abaumannii_kl78	0	0	0.93	0.93
abaumannii_kl79	0.02	0	0.93	0.94
abaumannii_kl8	0.02	0	0.88	0.89
abaumannii_kl80	0	0	0.93	0.93
abaumannii_kl81	0	0	0.94	0.94
abaumannii_kl82	0	0	0.93	0.93
abaumannii_kl83	0	0	0.92	0.92
abaumannii_kl84	0	0	0.93	0.93
abaumannii_kl85	0.03	0	0.92	0.93
abaumannii_kl86	0.03	0	0.9	0.92
abaumannii_kl87	0.03	0	0.89	0.91
abaumannii_kl88	0.08	0	0.88	0.92
abaumannii_kl89	0	0	0.93	0.93
abaumannii_kl9	0.01	0	0.87	0.88
abaumannii_kl90	0	0	0.94	0.94
abaumannii_kl91	0	0	0.92	0.92
abaumannii_kl92	0.03	0	0.88	0.9
abaumannii_kl93	0	0	0.94	0.94
abaumannii_kl94	0	0	0.94	0.94
abaumannii_kl95	0	0	0.9	0.9
abaumannii_kl96	0.01	0	0.92	0.92
abaumannii_kl97	0	0	0.86	0.86
abaumannii_kl98	0.03	0	0.91	0.93
abaumannii_kl99	0	0	0.89	0.89
abaumannii_pgll_wp_272749414.1	0	0	0.95	0.95
abaumannii_ph1	0.02	0	0.94	0.94
abaumannii_ph2	0.02	0	0.92	0.92
abaumannii_pilo_wp_000914629.1	0	0	0.95	0.95
arnt_waal_q1ldt6	0.05	0	0.92	0.95
citrobacter_o12_awu66636.1	0.01	0	0.88	0.88
citrobacter_o16_awu66650.1	0.06	0	0.89	0.92
citrobacter_o22_awu66665.1	0.02	0	0.9	0.91
citrobacter_o23_awu66675.1	0.02	0	0.91	0.92
citrobacter_o24_awu66681.1	0	0	0.9	0.9
citrobacter_o38_awu66741.1	0	0	0.93	0.93
citrobacter_o41_awu66755.1	0.02	0	0.91	0.92
cupriavidus_metallidurans_waal_q1lju1	0	0	0.92	0.92
ecloacae_o1_qhr93073.1	0.08	0	0.87	0.91
ecloacae_o10_qhr93177.1	0.02	0	0.91	0.92
ecloacae_o11_qhr93191.1	0.02	0	0.91	0.92
ecloacae_o12_qhr93204.1	0.04	0	0.86	0.87
ecloacae_o13_qhr93215.1	0	0	0.93	0.93
ecloacae_o14_qhr93227.1	0.01	0	0.89	0.9
ecloacae_o15_qhr93244.1	0	0	0.91	0.91
ecloacae_o16_qhr93256.1	0	0	0.88	0.88
ecloacae_o17_qhr93266.1	0.03	0	0.85	0.86
ecloacae_o18_qhr93279.1	0	0	0.91	0.91
ecloacae_o19_qhr93285.1	0.03	0	0.88	0.89
ecloacae_o20_qhr93298.1	0	0	0.9	0.9
ecloacae_o21_qhr93310.1	0	0	0.92	0.92
ecloacae_o22_qhr93318.1	0.04	0	0.89	0.91
ecloacae_o24_qhr93343.1	0	0	0.9	0.9
ecloacae_o26_qhr93353.1	0	0	0.93	0.93
ecloacae_o27_qhr93376.1	0.01	0	0.89	0.89
ecloacae_o3_qhr93084.1	0.05	0	0.92	0.95
ecloacae_o30_qhr93392.1	0.01	0	0.91	0.91
ecloacae_o4_qhr93104.1	0	0	0.94	0.94
ecloacae_o5_qhr93118.1	0	0	0.9	0.9
ecloacae_o6_qhr93127.1	0.01	0	0.93	0.94
ecloacae_o7_qhr93136.1	0	0	0.91	0.91
ecloacae_o8_qhr93146.1	0	0	0.85	0.85
ecloacae_o9_qhr93163.1	0.02	0	0.9	0.91
ecoli_eca_pay77806.1	0.06	0	0.91	0.94
ecoli_o1_adc54929.1	0.02	0	0.87	0.88
ecoli_o10_aig62532.1	0	0	0.94	0.94
ecoli_o100_aig62814.1	0.02	0	0.87	0.89
ecoli_o102_afs33314.1	0	0	0.92	0.92
ecoli_o103_aas73171.1	0	0	0.92	0.92
ecoli_o104_aak64372.1	0.03	0	0.9	0.92
ecoli_o105_aca24829.1	0	0	0.93	0.93
ecoli_o106_aay23745.1	0.04	0	0.89	0.91
ecoli_o107_ach97132.1	0.02	0	0.88	0.89
ecoli_o108_ajr19457.1	0.03	0	0.89	0.91
ecoli_o109_adr74237.1	0.05	0	0.89	0.91
ecoli_o11_adv17650.1	0	0	0.91	0.91
ecoli_o110_baq01533.1	0.03	0	0.91	0.92
ecoli_o111_aad46730.1	0	0	0.89	0.89
ecoli_o112ab_acd37086.1	0	0	0.91	0.91
ecoli_o112ac_acd37014.1	0	0	0.92	0.92
ecoli_o113_aad50486.1	0	0	0.91	0.91
ecoli_o114_aat77177.1	0	0	0.92	0.92
ecoli_o115_adn43838.1	0	0	0.9	0.9
ecoli_o116_baq01563.1	0	0	0.91	0.91
ecoli_o117_ach97143.1	0.02	0	0.88	0.89
ecoli_o118_abm53642.1	0	0	0.92	0.93
ecoli_o119_adb02825.1	0.03	0	0.88	0.9
ecoli_o12_aig62543.1	0	0	0.92	0.92
ecoli_o120_baq01584.1	0.03	0	0.9	0.92
ecoli_o121_afc91472.1	0.02	0	0.88	0.89
ecoli_o123_baq02224.1	0	0	0.89	0.89
ecoli_o124_acd37138.1	0	0	0.91	0.91
ecoli_o125ab_akm71200.1	0.01	0	0.89	0.89
ecoli_o126_abe98419.1	0.04	0	0.87	0.89
ecoli_o127_aar90892.1	0	0	0.89	0.89
ecoli_o128_aao37701.1	0	0	0.92	0.92
ecoli_o129_acd37181.1	0	0	0.9	0.91
ecoli_o13_baq02138.1	0	0	0.91	0.91
ecoli_o130_acd37157.1	0	0	0.9	0.9
ecoli_o131_aig62402.1	0.03	0	0.91	0.93
ecoli_o132_aig62486.1	0	0	0.85	0.85
ecoli_o133_aig62394.1	0.02	0	0.85	0.86
ecoli_o134_baq01687.1	0.03	0	0.9	0.92
ecoli_o135_acd37173.1	0	0	0.91	0.91
ecoli_o136_aig62419.1	0	0	0.9	0.9
ecoli_o137_aig62424.1	0	0	0.91	0.91
ecoli_o138_aaz85713.1	0	0	0.91	0.91
ecoli_o139_aig62435.1	0	0	0.9	0.9
ecoli_o140_aig62480.1	0.03	0	0.88	0.9
ecoli_o141_abi98976.1	0.02	0	0.88	0.89
ecoli_o142_agn91838.1	0	0	0.93	0.93
ecoli_o143_aca24764.1	0	0	0.84	0.84
ecoli_o144_aig62452.1	0.03	0	0.9	0.92
ecoli_o145_aax58762.1	0	0	0.91	0.91
ecoli_o146_abe98437.1	0.03	0	0.87	0.89
ecoli_o147_abi98986.1	0.02	0	0.92	0.93
ecoli_o148_aba42232.1	0	0	0.9	0.9
ecoli_o149_aaz65837.1	0	0	0.91	0.91
ecoli_o15_aav74543.1	0.02	0	0.9	0.91
ecoli_o150_aca24803.1	0	0	0.92	0.92
ecoli_o151_adq37322.1	0.01	0	0.92	0.93
ecoli_o152_aca24821.1	0	0	0.93	0.93
ecoli_o153_baq01759.1	0.01	0	0.89	0.89
ecoli_o154_baq01780.1	0.03	0	0.87	0.89
ecoli_o155_aav74550.1	0	0	0.91	0.91
ecoli_o156_aig62555.1	0.03	0	0.91	0.93
ecoli_o157_aac32340.1	0.03	0	0.48	0.5
ecoli_o158_adn43871.1	0	0	0.83	0.83
ecoli_o159_aca24890.1	0	0	0.86	0.86
ecoli_o16_baq00653.1	0	0	0.88	0.88
ecoli_o160_baq01812.1	0.02	0	0.91	0.92
ecoli_o161_adj19203.1	0.01	0	0.89	0.9
ecoli_o163_ajr19405.1	0	0	0.93	0.93
ecoli_o164_acd37146.1	0	0	0.91	0.91
ecoli_o165_adn43883.1	0.04	0	0.86	0.88
ecoli_o166_adc54957.1	0	0	0.9	0.9
ecoli_o167_acd37046.1	0	0	0.89	0.89
ecoli_o168_acd36996.1	0	0	0.92	0.92
ecoli_o169_aig62720.1	0	0	0.89	0.89
ecoli_o17_baq02105.1	0.04	0	0.89	0.91
ecoli_o170_aig62733.1	0	0	0.92	0.92
ecoli_o171_aig56920.2	0.02	0	0.89	0.9
ecoli_o172_aat28922.1	0	0	0.86	0.86
ecoli_o173_adn43894.1	0	0	0.92	0.92
ecoli_o174_aay28249.1	0.01	0	0.92	0.92
ecoli_o175_aig56909.1	0	0	0.89	0.89
ecoli_o176_aig62743.1	0.02	0	0.92	0.93
ecoli_o177_aay28257.1	0.03	0	0.92	0.93
ecoli_o178_aig62747.1	0.02	0	0.89	0.9
ecoli_o179_aig62759.1	0	0	0.91	0.91
ecoli_o18_adc54950.1	0	0	0.92	0.92
ecoli_o180_afn02899.1	0	0	0.9	0.9
ecoli_o181_aig62769.1	0.04	0	0.87	0.89
ecoli_o182_aig62775.1	0.05	0	0.86	0.89
ecoli_o183_bal03056.1	0	0	0.89	0.89
ecoli_o184_baq02031.1	0	0	0.83	0.84
ecoli_o185_baq02048.1	0.01	0	0.9	0.91
ecoli_o186_baq02068.1	0	0	0.89	0.89
ecoli_o187_aig56949.1	0	0	0.9	0.9
ecoli_o19_baq00705.1	0	0	0.9	0.9
ecoli_o2_acd75809.1	0.04	0	0.87	0.89
ecoli_o21_ach97162.1	0	0	0.93	0.93
ecoli_o22_abi34562.1	0.02	0	0.86	0.87
ecoli_o23_aig62571.1	0	0	0.93	0.93
ecoli_o24_aig62584.1	0	0	0.92	0.92
ecoli_o25_adi43263.	0.02	0	0.82	0.83
ecoli_o26_aan60459.1	0.03	0	0.91	0.92
ecoli_o27_adi43271.1	0	0	0.93	0.93
ecoli_o28ab_ajr19372.1	0.03	0	0.83	0.84
ecoli_o29_aca24852.1	0	0	0.93	0.93
ecoli_o3_ach97152.1	0	0	0.91	0.91
ecoli_o30_aig62591.1	0	0	0.92	0.92
ecoli_o32_acd37058.1	0	0	0.87	0.87
ecoli_o33_aig62598.1	0.04	0	0.89	0.91
ecoli_o34_aig62789.1	0.05	0	0.85	0.88
ecoli_o35_acv67289.1	0	0	0.91	0.91
ecoli_o36_baq00830.1	0	0	0.88	0.88
ecoli_o37_aig62499.1	0	0	0.92	0.92
ecoli_o38_ajr19362.1	0.04	0	0.88	0.9
ecoli_o39_baq00879.1	0	0	0.91	0.91
ecoli_o4_aat85653.1	0	0	0.94	0.94
ecoli_o40_acd37117.1	0.02	0	0.84	0.85
ecoli_o41_baq00893.1	0.04	0	0.84	0.86
ecoli_o42_baq00911.1	0	0	0.89	0.89
ecoli_o43_aig62638.1	0.02	0	0.86	0.87
ecoli_o44_wp_000549530.1	0.04	0	0.89	0.91
ecoli_o45_aax07747.1	0.01	0	0.88	0.89
ecoli_o46_baq00957.1	0.03	0	0.9	0.92
ecoli_o48_aig62384.1	0.02	0	0.91	0.92
ecoli_o49_baq00994.1	0.03	0	0.9	0.91
ecoli_o50_baq01012.1	0.04	0	0.88	0.89
ecoli_o51_baq01024.1	0	0	0.93	0.93
ecoli_o53_abz79721.1	0	0	0.9	0.9
ecoli_o54_baq02116.1	0	0	0.93	0.93
ecoli_o55_aal67557.1	0.03	0	0.9	0.92
ecoli_o56_abb29916.1	0	0	0.9	0.9
ecoli_o56_aca24882.1	0.03	0	0.9	0.91
ecoli_o59_aav74376.1	0.02	0	0.89	0.9
ecoli_o5ab_ajr19356.1	0.02	0	0.92	0.93
ecoli_o6_cad19991.1	0	0	0.91	0.91
ecoli_o61_adj19217.1	0	0	0.86	0.86
ecoli_o62_agn91809.1	0.03	0	0.8	0.82
ecoli_o63_acd75796.1	0	0	0.89	0.89
ecoli_o64_baq01114.1	0.01	0	0.88	0.89
ecoli_o65_ajr19392.1	0	0	0.83	0.84
ecoli_o66_aaz20761.1	0.06	0	0.84	0.87
ecoli_o68_ait92164.1	0.03	0	0.81	0.82
ecoli_o69_aig62798.1	0	0	0.92	0.92
ecoli_o7_aad44158.1	0	0	0.89	0.89
ecoli_o70_cbn82200.1	0	0	0.92	0.92
ecoli_o71_adi77033.1	0	0	0.92	0.92
ecoli_o73_aay23733.1	0.04	0	0.89	0.91
ecoli_o74_baq01207.1	0.06	0	0.81	0.84
ecoli_o75_aig62607.1	0	0	0.93	0.93
ecoli_o76_baq01218.1	0.01	0	0.89	0.9
ecoli_o77_aay23739.1	0.04	0	0.89	0.9
ecoli_o78_aig62619.1	0	0	0.93	0.93
ecoli_o79_aig62648.1	0	0	0.89	0.89
ecoli_o8_baq00597.1	0.01	0	0.93	0.93
ecoli_o80_baq01238.1	0.02	0	0.86	0.88
ecoli_o81_aig62868.1	0.06	0	0.88	0.91
ecoli_o82_baq01266.1	0.02	0	0.87	0.88
ecoli_o83_aig62838.1	0.01	0	0.87	0.88
ecoli_o84_aje24489.1	0	0	0.93	0.93
ecoli_o85_aig62657.1	0	0	0.89	0.89
ecoli_o86_b7_aao37717.1	0.05	0	0.87	0.9
ecoli_o87_aca24901.1	0	0	0.9	0.9
ecoli_o88_aig62878.1	0.03	0	0.88	0.9
ecoli_o90_baq01361.1	0	0	0.89	0.89
ecoli_o91_aak60458.1	0	0	0.91	0.91
ecoli_o93_baq01386.1	0.03	0	0.92	0.93
ecoli_o96_aig62627.1	0.01	0	0.89	0.89
ecoli_o98_abb04486.1	0.04	0	0.89	0.91
ecoli_ogn1_bau71558.1	0.01	0	0.93	0.93
ecoli_ogn10_bau71608.1	0	0	0.91	0.91
ecoli_ogn12_bau71625.1	0	0	0.93	0.93
ecoli_ogn13_bav90482.1	0	0	0.93	0.93
ecoli_ogn14_bav90498.1	0	0	0.93	0.93
ecoli_ogn15_bav90511.1	0.02	0	0.88	0.88
ecoli_ogn16_bav90529.1	0.02	0	0.88	0.89
ecoli_ogn17_bav90548.1	0.02	0	0.91	0.92
ecoli_ogn2_bav90417.1	0	0	0.92	0.92
ecoli_ogn3_bav90433.1	0.03	0	0.8	0.82
ecoli_ogn31_bau71639.1	0	0	0.92	0.92
ecoli_ogn4_bav90441.1	0.04	0	0.84	0.86
ecoli_ogn5_bav90458.1	0.01	0	0.88	0.88
ecoli_ogn8_bau71572.1	0.1	0	0.86	0.91
ecoli_ogn9_bau71586.1	0.01	0	0.87	0.88
ecoli_ox13_ajr19385.1	0	0	0.91	0.91
ecoli_ox18_aig62370.1	0	0	0.88	0.88
ecoli_ox25_ajr19416.1	0.02	0	0.92	0.93
ecoli_waal_r1_aac69682.1	0	0	0.94	0.94
ecoli_waal_r2_aac69661.1	0.02	0	0.91	0.92
ecoli_waal_r3_aac69648.1	0.02	0	0.9	0.91
ecoli_waal_r4_aac69671.1	0	0	0.91	0.91
ecoli_waal_r5_np_418079.1	0.03	0	0.92	0.94
ipr002760_o_anti_polymase_seed_o26751	0	0	0.93	0.93
ipr007016_wzy_c_seed_q6mi87	0	0	0.92	0.92
ipr009630_duf1229_seed_q8f5m4	0.05	0	0.88	0.9
ipr010691_wzye_seed_q329x2	0.06	0	0.91	0.94
ipr017528_pep_o_lig_1_seed_a0a6l5qa75	0	0	0.93	0.93
ipr021797_wzy_c2_seed_q122i6	0	0	0.95	0.95
ipr024013_colanic_acid_synth_wcad_seed_a0a0a1a6j9	0	0	0.93	0.93
ipr029468_oag_pol_wzy_seed_p39854	0.01	0	0.94	0.94
ipr045918_duf6337_seed_a0a1e3x2d7	0.04	0	0.92	0.94
ipr045949_duf6369_seed_b1xzr5	0	0	0.86	0.86
ipr045979_duf5935_seed_a0a0q4kqw8	0.03	0	0.9	0.92
ipr046073_duf6032_seed_q93qw1	0	0	0.89	0.89
ipr046303_duf6418_seed_a0a2s2fhd5	0.02	0	0.91	0.92
ipr049458_epsg_seeda0km85a0km85	0	0	0.93	0.93
klebsiella_kl1_09	0	0	0.87	0.87
klebsiella_kl10_14	0	0	0.9	0.9
klebsiella_kl101_12	0	0	0.91	0.91
klebsiella_kl102_08	0.04	0	0.89	0.91
klebsiella_kl103_12	0	0	0.91	0.91
klebsiella_kl104_12	0	0	0.86	0.86
klebsiella_kl105_13	0	0	0.92	0.92
klebsiella_kl106_07	0	0	0.9	0.9
klebsiella_kl108_11	0	0	0.91	0.91
klebsiella_kl109_12	0	0	0.88	0.88
klebsiella_kl11_08	0	0	0.94	0.94
klebsiella_kl110_09	0	0	0.88	0.88
klebsiella_kl111_07	0	0	0.91	0.91
klebsiella_kl112_09	0	0	0.93	0.93
klebsiella_kl114_08	0	0	0.92	0.92
klebsiella_kl115_10	0.06	0	0.86	0.89
klebsiella_kl116_09	0.04	0	0.87	0.89
klebsiella_kl117_11	0	0	0.9	0.9
klebsiella_kl118_09	0	0	0.92	0.92
klebsiella_kl119_07	0.02	0	0.91	0.92
klebsiella_kl12_12	0	0	0.91	0.91
klebsiella_kl120_13	0	0	0.9	0.9
klebsiella_kl121_09	0.01	0	0.91	0.92
klebsiella_kl122_07	0.02	0	0.9	0.91
klebsiella_kl123_09	0	0	0.91	0.91
klebsiella_kl124_11	0.01	0	0.92	0.92
klebsiella_kl125_09	0.02	0	0.91	0.92
klebsiella_kl127_09	0	0	0.85	0.85
klebsiella_kl128_09	0	0	0.91	0.91
klebsiella_kl13_09	0	0	0.91	0.91
klebsiella_kl130_08	0.01	0	0.92	0.93
klebsiella_kl131_17	0.01	0	0.92	0.93
klebsiella_kl132_07	0	0	0.92	0.92
klebsiella_kl133_07	0	0	0.92	0.92
klebsiella_kl134_10	0.03	0	0.9	0.92
klebsiella_kl135_13	0	0	0.92	0.92
klebsiella_kl136_07	0.03	0	0.9	0.92
klebsiella_kl137_15	0.02	0	0.91	0.92
klebsiella_kl138_09	0.03	0	0.91	0.92
klebsiella_kl139_07	0.03	0	0.9	0.91
klebsiella_kl14_11	0.02	0	0.9	0.91
klebsiella_kl140_07	0.02	0	0.92	0.93
klebsiella_kl141_11	0.02	0	0.89	0.9
klebsiella_kl142_11	0.02	0	0.9	0.91
klebsiella_kl143_09	0	0	0.92	0.92
klebsiella_kl144_09	0	0	0.89	0.89
klebsiella_kl145_13	0.04	0	0.89	0.91
klebsiella_kl146_07	0.02	0	0.92	0.92
klebsiella_kl147_09	0	0	0.92	0.92
klebsiella_kl149_14	0	0	0.92	0.92
klebsiella_kl15_12	0	0	0.92	0.92
klebsiella_kl150_08	0	0	0.92	0.92
klebsiella_kl151_11	0.01	0	0.84	0.85
klebsiella_kl152_08	0.04	0	0.89	0.91
klebsiella_kl153_07	0.02	0	0.89	0.9
klebsiella_kl154_07	0.02	0	0.92	0.92
klebsiella_kl155_13	0	0	0.91	0.91
klebsiella_kl156-d1_09	0	0	0.91	0.91
klebsiella_kl157_11	0.01	0	0.9	0.91
klebsiella_kl158_09	0.02	0	0.91	0.92
klebsiella_kl159_11	0	0	0.91	0.91
klebsiella_kl16_08	0.02	0	0.9	0.91
klebsiella_kl160_07	0.03	0	0.91	0.93
klebsiella_kl162_11	0	0	0.91	0.91
klebsiella_kl163_08	0	0	0.93	0.93
klebsiella_kl164_10	0	0	0.85	0.85
klebsiella_kl165_08	0	0	0.93	0.93
klebsiella_kl166_09	0.02	0	0.92	0.93
klebsiella_kl167_07	0	0	0.9	0.9
klebsiella_kl168_14	0	0	0.9	0.9
klebsiella_kl169_11	0.02	0	0.88	0.89
klebsiella_kl17_07	0.02	0	0.92	0.93
klebsiella_kl170_12	0	0	0.91	0.91
klebsiella_kl171_07	0	0	0.9	0.9
klebsiella_kl172_21	0	0	0.92	0.92
klebsiella_kl173_07	0	0	0.89	0.89
klebsiella_kl174_07	0	0	0.92	0.92
klebsiella_kl175_12	0.03	0	0.92	0.93
klebsiella_kl176_11	0.01	0	0.91	0.92
klebsiella_kl177_07	0.05	0	0.89	0.92
klebsiella_kl178_07	0.04	0	0.89	0.91
klebsiella_kl179_08	0.03	0	0.9	0.92
klebsiella_kl18_12	0	0	0.9	0.9
klebsiella_kl180_09	0.01	0	0.9	0.9
klebsiella_kl181_10	0.02	0	0.91	0.92
klebsiella_kl182_07	0.02	0	0.9	0.91
klebsiella_kl183_12	0.04	0	0.88	0.9
klebsiella_kl184_18	0	0	0.94	0.94
klebsiella_kl185_12	0	0	0.91	0.91
klebsiella_kl186_12	0	0	0.93	0.93
klebsiella_kl19_13	0	0	0.89	0.89
klebsiella_kl2_10	0.03	0	0.9	0.92
klebsiella_kl20_08	0	0	0.92	0.92
klebsiella_kl21_08	0	0	0.93	0.93
klebsiella_kl22_07	0	0	0.9	0.9
klebsiella_kl23_10	0	0	0.89	0.89
klebsiella_kl24_09	0.02	0	0.91	0.92
klebsiella_kl25_08	0	0	0.89	0.89
klebsiella_kl26_07	0	0	0.92	0.92
klebsiella_kl27_11	0	0	0.92	0.92
klebsiella_kl28_10	0.02	0	0.9	0.91
klebsiella_kl3_14	0	0	0.92	0.92
klebsiella_kl30_10	0.05	0	0.81	0.83
klebsiella_kl31_09	0	0	0.92	0.92
klebsiella_kl32_11	0	0	0.92	0.92
klebsiella_kl33_18	0.04	0	0.91	0.93
klebsiella_kl34_xan29115.1	0.06	0	0.88	0.91
klebsiella_kl35_07	0.01	0	0.9	0.91
klebsiella_kl36_12	0.05	0	0.9	0.92
klebsiella_kl37_07	0	0	0.9	0.9
klebsiella_kl38_08	0	0	0.92	0.92
klebsiella_kl39_08	0.02	0	0.93	0.94
klebsiella_kl4_15	0.04	0	0.9	0.92
klebsiella_kl40_13	0.01	0	0.92	0.92
klebsiella_kl41_12	0	0	0.9	0.9
klebsiella_kl42_09	0.04	0	0.9	0.92
klebsiella_kl43_09	0	0	0.89	0.89
klebsiella_kl44_11	0.01	0	0.83	0.83
klebsiella_kl45_11	0.03	0	0.9	0.92
klebsiella_kl46_09	0.02	0	0.92	0.94
klebsiella_kl47_11	0.02	0	0.9	0.91
klebsiella_kl48_10	0	0	0.92	0.92
klebsiella_kl49_08	0	0	0.88	0.89
klebsiella_kl5_07	0	0	0.9	0.9
klebsiella_kl51_09	0	0	0.93	0.93
klebsiella_kl52_13	0	0	0.93	0.93
klebsiella_kl53_10	0	0	0.93	0.93
klebsiella_kl54_09	0	0	0.92	0.92
klebsiella_kl55_11	0.04	0	0.89	0.91
klebsiella_kl56_13	0	0	0.92	0.92
klebsiella_kl57_11	0	0	0.9	0.9
klebsiella_kl58_09	0.02	0	0.92	0.93
klebsiella_kl59_07	0.04	0	0.9	0.92
klebsiella_kl6_07	0	0	0.92	0.92
klebsiella_kl60_07	0.01	0	0.92	0.92
klebsiella_kl61_09	0.03	0	0.92	0.94
klebsiella_kl62_11	0.04	0	0.67	0.69
klebsiella_kl63_10	0	0	0.9	0.9
klebsiella_kl64_10	0.04	0	0.89	0.91
klebsiella_kl65_07	0.03	0	0.9	0.91
klebsiella_kl66_09	0	0	0.87	0.87
klebsiella_kl67_07	0.04	0	0.87	0.89
klebsiella_kl68_12	0.02	0	0.87	0.89
klebsiella_kl69_10	0.01	0	0.84	0.85
klebsiella_kl7_10	0.03	0	0.9	0.92
klebsiella_kl70_10	0	0	0.9	0.9
klebsiella_kl71_13	0	0	0.9	0.9
klebsiella_kl72_12	0	0	0.92	0.92
klebsiella_kl74_11	0.03	0	0.9	0.92
klebsiella_kl79_12	0	0	0.91	0.91
klebsiella_kl8_07	0.01	0	0.9	0.91
klebsiella_kl80_bat24408.1	0.03	0	0.89	0.91
klebsiella_kl81_09	0	0	0.93	0.93
klebsiella_kl82_09	0	0	0.93	0.93
klebsiella_kl9_10	0.02	0	0.46	0.47
klebsiella_waal_aad37765.1	0	0	0.92	0.92
myxococcus_waal_abf89195.1	0.07	0	0.91	0.94
neisseria_meningitidis_pgll_aek98518.1	0.02	0	0.93	0.95
nf033860_wzy_o6_o28_seed_a0a4q7bkv0	0	0	0.92	0.92
nf041436_wzy_strepto_seed_a0a822w5q0	0.02	0	0.91	0.92
nf041870_wzy_eps_a0a554gry5	0.05	0	0.91	0.94
paeruginosa	0.03	0	0.93	0.95
paeruginosa_o1_aam27546.1	0.07	0	0.86	0.9
paeruginosa_o16_prophage_abm21470.1	0.01	0	0.88	0.88
paeruginosa_o18_aam27693.1	0.02	0	0.9	0.91
paeruginosa_o19_aam27711.1	0	0	0.93	0.93
paeruginosa_o2_prophage_abm21469.1	0.01	0	0.88	0.88
paeruginosa_o20_aam27748.1	0.02	0	0.9	0.91
paeruginosa_o3_aam27766.1	0	0	0.91	0.91
paeruginosa_o4_aam27782.1	0.01	0	0.83	0.83
paeruginosa_o5_aag06542.1	0.02	0	0.9	0.91
paeurginosa_o10_aam27560.1	0	0	0.93	0.93
paeurginosa_o11_aam27574.1	0.02	0	0.89	0.9
paeurginosa_o12_aam27595.1	0.02	0	0.92	0.93
paeurginosa_o13_aam27615.1	0	0	0.92	0.92
paeurginosa_o15_lory_aam27645.1	0	0	0.91	0.91
paeurginosa_o7_aam27831.1	0.05	0	0.86	0.88
paeurginosa_o8_aam27851.1	0.03	0	0.85	0.86
paeurginosa_o9_aam27879.1	0	0	0.92	0.92
proteus_o1_axy99318.1	0.03	0	0.89	0.91
proteus_o10_adl32296.1	0.03	0	0.92	0.94
proteus_o11_axy99417.1	0.03	0	0.9	0.91
proteus_o12_axy99432.1	0	0	0.92	0.92
proteus_o13_axy99447.1	0	0	0.93	0.93
proteus_o14ab_axy99463.1	0.02	0	0.92	0.94
proteus_o16_axy99476.1	0	0	0.93	0.93
proteus_o17_axy99492.1	0.03	0	0.88	0.9
proteus_o18_qim23321.1	0	0	0.92	0.92
proteus_o19a_axy99523.1	0.02	0	0.88	0.89
proteus_o2_axy99336.1	0	0	0.92	0.92
proteus_o20_axy99542.1	0	0	0.91	0.91
proteus_o21_axy99555.1	0.02	0	0.9	0.91
proteus_o23a_23c_adl32314.1	0	0	0.68	0.68
proteus_o24_axy99570.1	0	0	0.92	0.92
proteus_o25_axy99585.1	0.03	0	0.9	0.91
proteus_o26_axy99601.1	0.06	0	0.87	0.9
proteus_o27_adl32320.1	0	0	0.92	0.92
proteus_o28_axz00116.1	0	0	0.92	0.92
proteus_o29a_axy99612.1	0	0	0.87	0.87
proteus_o30_axy99624.1	0.02	0	0.91	0.92
proteus_o31ab_axy99635.1	0	0	0.93	0.93
proteus_o32_axy99655.1	0.01	0	0.92	0.92
proteus_o33_axy99670.1	0	0	0.89	0.89
proteus_o34_axy99682.1	0	0	0.92	0.92
proteus_o36_axy99696.1	0.08	0	0.84	0.88
proteus_o37ab_axy99713.1	0	0	0.9	0.9
proteus_o3a_3c_adl32282.1	0	0	0.93	0.93
proteus_o40_axy99727.1	0.02	0	0.9	0.91
proteus_o41_axy99743.1	0.01	0	0.92	0.93
proteus_o42_axy99754.1	0	0	0.88	0.88
proteus_o44_axy99768.1	0	0	0.9	0.9
proteus_o45_axy99788.1	0.01	0	0.9	0.91
proteus_o47_adl32336.1	0	0	0.92	0.92
proteus_o48_axy99801.1	0.04	0	0.9	0.92
proteus_o5_axy99352.1	0	0	0.84	0.84
proteus_o50_axy99813.1	0.01	0	0.92	0.93
proteus_o51_axy99835.1	0.03	0	0.86	0.88
proteus_o52_axy99843.1	0	0	0.9	0.9
proteus_o53_axy99857.1	0	0	0.91	0.91
proteus_o54ab_axy99873.1	0.02	0	0.92	0.94
proteus_o55_axy99885.1	0.03	0	0.9	0.92
proteus_o56_axy99906.1	0.02	0	0.91	0.92
proteus_o57_axy99926.1	0	0	0.91	0.91
proteus_o58_axy99943.1	0.02	0	0.88	0.9
proteus_o59_axy99961.1	0	0	0.86	0.86
proteus_o6_axy99368.1	0.01	0	0.92	0.93
proteus_o60_axz00132.1	0.01	0	0.91	0.91
proteus_o61_axy99974.1	0	0	0.88	0.88
proteus_o62_axy99991.1	0.05	0	0.88	0.9
proteus_o65_axz00003.1	0.02	0	0.89	0.9
proteus_o67_axz00013.1	0.02	0	0.88	0.89
proteus_o69_axz00032.1	0.02	0	0.9	0.91
proteus_o71_axz00047.1	0	0	0.91	0.91
proteus_o72ab_axz00060.1	0	0	0.92	0.92
proteus_o73ab_axz00072.1	0	0	0.92	0.92
proteus_o74_axz00085.1	0	0	0.91	0.91
proteus_o75_axz00101.1	0	0	0.94	0.94
proteus_o8_axy99381.1	0	0	0.9	0.9
proteus_o9_axy99400.1	0	0	0.89	0.89
proteus_waal_car46213.1	0.03	0	0.89	0.91
salmonella_a_aav77445.1	0.03	0	0.91	0.92
salmonella_b1_aaa27210.1	0.03	0	0.91	0.92
salmonella_b2_acf92750.1	0.01	0	0.89	0.9
salmonella_c1_aab49386.1	0	0	0.92	0.92
salmonella_c2_acf64132.1	0	0	0.91	0.91
salmonella_d1_ach74809.1	0.03	0	0.91	0.92
salmonella_d2_ags07363.1	0.02	0	0.88	0.89
salmonella_d3_ags07346.1	0.01	0	0.9	0.9
salmonella_e_caa43077.1	0.02	0	0.87	0.88
salmonella_o11_afw04820.1	0	0	0.93	0.93
salmonella_o13_abp35578.1	0	0	0.9	0.9
salmonella_o16_adv17638.1	0	0	0.92	0.92
salmonella_o17_abl63455.1	0	0	0.89	0.89
salmonella_o18_abl63451.1	0.02	0	0.91	0.92
salmonella_o21_afw04741.1	0	0	0.91	0.91
salmonella_o28_aco40479.1	0.01	0	0.91	0.92
salmonella_o30_aav34507.1	0.03	0	0.51	0.53
salmonella_o35_aak83017.1	0	0	0.9	0.9
salmonella_o38_adv17634.1	0	0	0.93	0.93
salmonella_o39_afw04696.1	0	0	0.83	0.83
salmonella_o40_afw04706.1	0.04	0	0.9	0.92
salmonella_o41_acj26814.1	0	0	0.94	0.94
salmonella_o42_afw04812.1	0	0	0.91	0.91
salmonella_o43_afw04802.1	0.02	0	0.91	0.92
salmonella_o44_afw04828.1	0	0	0.93	0.93
salmonella_o45_afw04716.1	0	0	0.91	0.91
salmonella_o47_afw04867.1	0	0	0.92	0.92
salmonella_o48_afw04668.1	0	0	0.91	0.91
salmonella_o50_aav34523.1	0	0	0.91	0.91
salmonella_o51_afw04888.1	0	0	0.91	0.91
salmonella_o52_afw04790.1	0.04	0	0.83	0.85
salmonella_o53_afw04837.1	0.02	0	0.91	0.92
salmonella_o55_adi39344.1	0.02	0	0.91	0.92
salmonella_o56_adi77005.1	0	0	0.87	0.87
salmonella_o57_afw04883.1	0	0	0.94	0.94
salmonella_o58_acj26787.1	0.03	0	0.88	0.89
salmonella_o59_afw04847.1	0	0	0.91	0.91
salmonella_o6_14_aaq91207.1	0.05	0	0.89	0.91
salmonella_o60_afw04860.1	0	0	0.9	0.9
salmonella_o61_afw04757.1	0.03	0	0.9	0.91
salmonella_o62_afw04785.1	0	0	0.91	0.91
salmonella_o63_afw04735.1	0.03	0	0.85	0.86
salmonella_o65_afw04684.1	0	0	0.93	0.93
shigella_b1_ugn72586.1	0	0	0.91	0.91
shigella_b10_aaw29815.1	0	0	0.88	0.88
shigella_b11_aas98031.1	0	0	0.93	0.93
shigella_b12_acd37026.1	0.04	0	0.84	0.86
shigella_b13_aar24270.1	0.01	0	0.86	0.87
shigella_b14_acd37051.1	0	0	0.89	0.89
shigella_b15_acd37078.1	0	0	0.91	0.91
shigella_b16_abd19779.1	0	0	0.88	0.88
shigella_b17_abi55342.1	0.02	0	0.93	0.94
shigella_b18_aay23339.1	0.01	0	0.82	0.82
shigella_b2_acd37126.1	0	0	0.87	0.87
shigella_b3_acd37037.1	0	0	0.91	0.91
shigella_b4_aal27318.1	0.01	0	0.9	0.9
shigella_b5_aal27327.1	0	0	0.88	0.88
shigella_b6_aal27339.1	0	0	0.88	0.88
shigella_b7_acd37072.1	0.02	0	0.86	0.87
shigella_b8_aca24754.1	0	0	0.83	0.83
shigella_b9_aal27351.1	0	0	0.93	0.93
shigella_d1_ugn72378.1	0	0	0.9	0.9
shigella_d10_aca24912.1	0.02	0	0.9	0.91
shigella_d11_aca24840.1	0	0	0.93	0.93
shigella_d12_aca24811.1	0	0	0.93	0.93
shigella_d13_aca24792.1	0	0	0.93	0.93
shigella_d2_acd37006.1	0	0	0.92	0.92
shigella_d3_acd37105.1	0	0	0.92	0.92
shigella_d4_acd36984.1	0	0	0.92	0.92
shigella_d5_aca24868.1	0.03	0	0.9	0.91
shigella_d7_aar97964.1	0.02	0	0.88	0.89
shigella_d8_aca24776.1	0.04	0	0.88	0.9
shigella_d9_acd37111.1	0.02	0	0.84	0.85
shigella_f2_ugn72493.1	0	0	0.91	0.91
shigella_f6_aca24772.1	0.02	0	0.92	0.93
spneumoniae_1_cai32705.1	0.04	0	0.89	0.91
spneumoniae_10a_cai33048.1	0	0	0.94	0.94
spneumoniae_10b_cai34733.1	0	0	0.94	0.94
spneumoniae_10c_cai33084.1	0	0	0.94	0.94
spneumoniae_10d_39x	0	0	0.92	0.92
spneumoniae_10f_cai33105.1	0	0	0.94	0.94
spneumoniae_11a_cai33128.1	0	0	0.92	0.92
spneumoniae_11b_cai33149.1	0	0	0.93	0.93
spneumoniae_11c_cai33169.1	0	0	0.93	0.93
spneumoniae_11d_cai33188.1	0	0	0.92	0.92
spneumoniae_11e_adn28010.1	0	0	0.92	0.92
spneumoniae_11f_cai33207.1	0	0	0.92	0.92
spneumoniae_12a_cai33226.1	0	0	0.89	0.89
spneumoniae_12b_cai33252.1	0	0	0.88	0.88
spneumoniae_12f_cai33278.1	0	0	0.88	0.88
spneumoniae_13_cai33309.1	0.02	0	0.93	0.94
spneumoniae_14_cai33324.1	0	0	0.91	0.91
spneumoniae_15a_cai33343.1	0	0	0.93	0.93
spneumoniae_15b_cai33366.1	0.01	0	0.91	0.91
spneumoniae_15c_cai33389.1	0.01	0	0.91	0.91
spneumoniae_15f_cai33412.1	0	0	0.93	0.93
spneumoniae_16a_cai33441.1	0.06	0	0.9	0.93
spneumoniae_16f_cai33466.1	0.04	0	0.9	0.92
spneumoniae_17a_cai33491.1	0	0	0.93	0.93
spneumoniae_17f_cai33515.1	0.01	0	0.94	0.95
spneumoniae_18a_cai33537.1	0.02	0	0.93	0.94
spneumoniae_18b_cai33561.1	0.02	0	0.92	0.93
spneumoniae_18c_cai33585.1	0.02	0	0.92	0.93
spneumoniae_18f_cai33610.1	0.02	0	0.92	0.93
spneumoniae_19a_cai33631.1	0.01	0	0.94	0.94
spneumoniae_19b_cai33652.1	0	0	0.9	0.9
spneumoniae_19c_cai33675.1	0	0	0.9	0.9
spneumoniae_19f_cai33700.1	0.02	0	0.93	0.94
spneumoniae_2_cai32727.1	0.03	0	0.84	0.85
spneumoniae_20a_cai33718.1	0	0	0.93	0.93
spneumoniae_20b_afn40464.1	0	0	0.93	0.93
spneumoniae_21_cai33745.1	0	0	0.92	0.92
spneumoniae_22a_cai33774.1	0	0	0.89	0.89
spneumoniae_22f_cai33798.1	0	0	0.89	0.89
spneumoniae_23a_cai33817.1	0.02	0	0.94	0.95
spneumoniae_23b_cai33840.1	0	0	0.92	0.92
spneumoniae_23f_cai33862.1	0	0	0.92	0.92
spneumoniae_24a_cai33890.1	0.02	0	0.9	0.91
spneumoniae_24b_1_cai33915.1	0.02	0	0.91	0.91
spneumoniae_24c_24x_up74135.1	0.02	0	0.91	0.91
spneumoniae_24f_1_cai33941.1	0.02	0	0.91	0.91
spneumoniae_25a_cai33966.2	0.02	0	0.92	0.93
spneumoniae_25f_cai33983.1	0.02	0	0.92	0.93
spneumoniae_27_cai34008.1	0	0	0.94	0.94
spneumoniae_28a_cai34032.1	0	0	0.89	0.89
spneumoniae_28f_cai34057.2	0	0	0.89	0.89
spneumoniae_29_cai34080.1	0.02	0	0.93	0.94
spneumoniae_31_cai34099.1	0	0	0.89	0.89
spneumoniae_32a_cai34124.1	0	0	0.92	0.92
spneumoniae_32f_cai34150.1	0	0	0.92	0.92
spneumoniae_33a_cai34177.1	0	0	0.94	0.94
spneumoniae_33b_cai34198.1	0.01	0	0.92	0.92
spneumoniae_33c_cai34217.1	0.01	0	0.93	0.93
spneumoniae_33d_cai34236.1	0.01	0	0.92	0.92
spneumoniae_33f_cai34254.1	0	0	0.94	0.94
spneumoniae_33g_wnt95670.1	0	0	0.94	0.94
spneumoniae_34_cai34269.1	0	0	0.91	0.91
spneumoniae_35a_cai34286.1	0	0	0.94	0.94
spneumoniae_35b_cai34310.1	0.05	0	0.92	0.94
spneumoniae_35c_cai34328.1	0	0	0.94	0.94
spneumoniae_35d_aqs23546.1	0.05	0	0.92	0.94
spneumoniae_35f_cai34348.1	0.04	0	0.92	0.94
spneumoniae_36_cai34369.1	0.05	0	0.92	0.95
spneumoniae_37_cai34388.1	0	0	0.94	0.94
spneumoniae_38_cai34407.1	0.02	0	0.92	0.93
spneumoniae_39_cai34436.1	0	0	0.93	0.93
spneumoniae_4_cai32772.1	0	0	0.92	0.92
spneumoniae_40_cai34454.1	0	0	0.91	0.91
spneumoniae_41a_cai34475.1	0	0	0.87	0.87
spneumoniae_41f_cai34498.1	0	0	0.88	0.88
spneumoniae_42_cai34519.1	0	0	0.94	0.94
spneumoniae_43_cai34544.1	0	0	0.94	0.94
spneumoniae_44_cai34753.1	0	0	0.88	0.88
spneumoniae_45_cai34587.1	0	0	0.92	0.92
spneumoniae_46_cai34613.1	0	0	0.89	0.89
spneumoniae_47a_cai34641.1	0	0	0.94	0.94
spneumoniae_47f_cai34657.1	0.04	0	0.92	0.94
spneumoniae_48_cai34680.1	0	0	0.93	0.93
spneumoniae_5_cai32797.1	0.02	0	0.89	0.9
spneumoniae_6a_cai32823.1	0.01	0	0.92	0.92
spneumoniae_6b_cai32843.1	0.01	0	0.92	0.92
spneumoniae_6c_aeo88686.1	0.01	0	0.92	0.93
spneumoniae_6d_ado95346.1	0.01	0	0.92	0.92
spneumoniae_6e_sbt85383.1	0.01	0	0.92	0.93
spneumoniae_6f_ahf51336.1	0.01	0	0.92	0.92
spneumoniae_6g_ahf51351.1	0.01	0	0.92	0.92
spneumoniae_7a_cai32867.1	0.04	0	0.89	0.91
spneumoniae_7b_cai32889.1	0.01	0	0.91	0.91
spneumoniae_7c_cai32910.1	0.01	0	0.91	0.91
spneumoniae_7f_cai32935.1	0.04	0	0.89	0.91
spneumoniae_8_cai32957.1	0.03	0	0.91	0.92
spneumoniae_9a_cai32973.1	0	0	0.92	0.92
spneumoniae_9l_cai32993.1	0	0	0.92	0.92
spneumoniae_9n_cai33011.1	0	0	0.92	0.92
spneumoniae_9v_cai33029.1	0	0	0.92	0.92
tigr04370_glyco_rpt_poly_seed_a0a420e603	0.03	0	0.91	0.92
vibrio_cholerae_pgll_wp_001883229.1	0.07	0	0.92	0.96
vibrio_cholerae_waal_aal76926.1	0	0	0.94	0.94
ypseudotuberculosis_o10_adx97403.1	0.02	0	0.85	0.86
ypseudotuberculosis_o11_acv52983.1	0.01	0	0.92	0.93
ypseudotuberculosis_o12_afv46136.1	0	0	0.93	0.93
ypseudotuberculosis_o15_cax18360.1	0.03	0	0.88	0.89
ypseudotuberculosis_o1a_aan23041.1	0	0	0.94	0.94
ypseudotuberculosis_o1b_cab63298.1	0.01	0	0.92	0.93
ypseudotuberculosis_o1c_adi59429.1	0	0	0.92	0.92
ypseudotuberculosis_o2a_aan23078.1	0	0	0.94	0.94
ypseudotuberculosis_o2b_adi59445.1	0	0	0.92	0.92
ypseudotuberculosis_o2c_aka20935.1	0	0	0.9	0.9
ypseudotuberculosis_o3_ajj60823.1	0.02	0	0.9	0.91
ypseudotuberculosis_o4a_aka20966.1	0	0	0.9	0.9
ypseudotuberculosis_o4b_aan23057.1	0	0	0.94	0.94
ypseudotuberculosis_o5a_aka20981.1	0.03	0	0.88	0.89
ypseudotuberculosis_o5b_aka20999.1	0.02	0	0.88	0.89
ypseudotuberculosis_o6_aep25500.1	0	0	0.92	0.92
ypseudotuberculosis_o7_aep25477.1	0	0	0.88	0.88
ypseudotuberculosis_o9_cdf66396.1	0.03	0	0.92	0.93
