# Supplementary material
Source: Research Square preprint supplement (doi:10.21203/rs.3.rs-9286338/v1)
Supplement: Supplementary file 2 [file 138af204281befffa2d9779f.pdf]

# Redefining bacterial Wzy polymerase families via three-dimensional structure-based clustering

Thomas D. Stanton<sup>1,2</sup>, Liam Ulacco<sup>3</sup>, Ruth M. Hall<sup>4,5</sup>, Kelly L. Wyres<sup>1,2,6</sup>, Johanna J. Kenyon<sup>3,7,8,\*</sup>

<sup>1</sup> *Department of Infectious Diseases, School of Translational Medicine, Monash University, Melbourne, Victoria, Australia*

<sup>2</sup> *Centre to Impact AMR, Monash University, Clayton, Victoria, Australia*

<sup>3</sup> *Centre for Immunology and Infection Control, School of Biomedical Sciences, Faculty of Health, Queensland University of Technology, Brisbane, Queensland, Australia*

<sup>4</sup> *School of Life and Environmental Science, The University of Sydney, Sydney, New South Wales, Australia*

<sup>5</sup> *Sydney Infectious Diseases Institute, The University of Sydney, Sydney, Australia*

<sup>6</sup> *Department of Infection Biology, Faculty of Infectious and Tropical Diseases, London School of Hygiene & Tropical Medicine, United Kingdom*

<sup>7</sup> *School of Pharmacy and Medical Sciences, Health Group, Griffith University, Gold Coast Campus, Southport, Queensland, Australia.*

<sup>8</sup> *Institute for Biomedicine and Glycomics, Griffith University, Parklands Drive, Gold Coast, Queensland, Australia*

## Table of Contents

### SUPPLEMENTARY FIGURES

**Supplementary Figure 1.** General properties and relationships of Wzy polymerases from *A. baumannii*.

**Supplementary Figure 2.** Clustering of representative seed sequences with *A. baumannii* Wzy.

**Supplementary Figure 3.** Relationship between WzyC polymerases and UndPP-glycan ligases.

**Supplementary Figure 4.** Precision recall curves for Wzy detection using generated HMM profiles.

### SUPPLEMENTARY TABLES

**Supplementary Table 1.** Information on Wzy polymerase sequences used in this study.

**Supplementary Table 2.** Information on ligase sequences used in this study.

**Supplementary Table 3.** Results of genome screening using novel HMMs.

**Supplementary Table 4.** Alphafold3 metrics of modelled structures

### SUPPLEMENTARY REFERENCES

References for Supplementary Table 3.

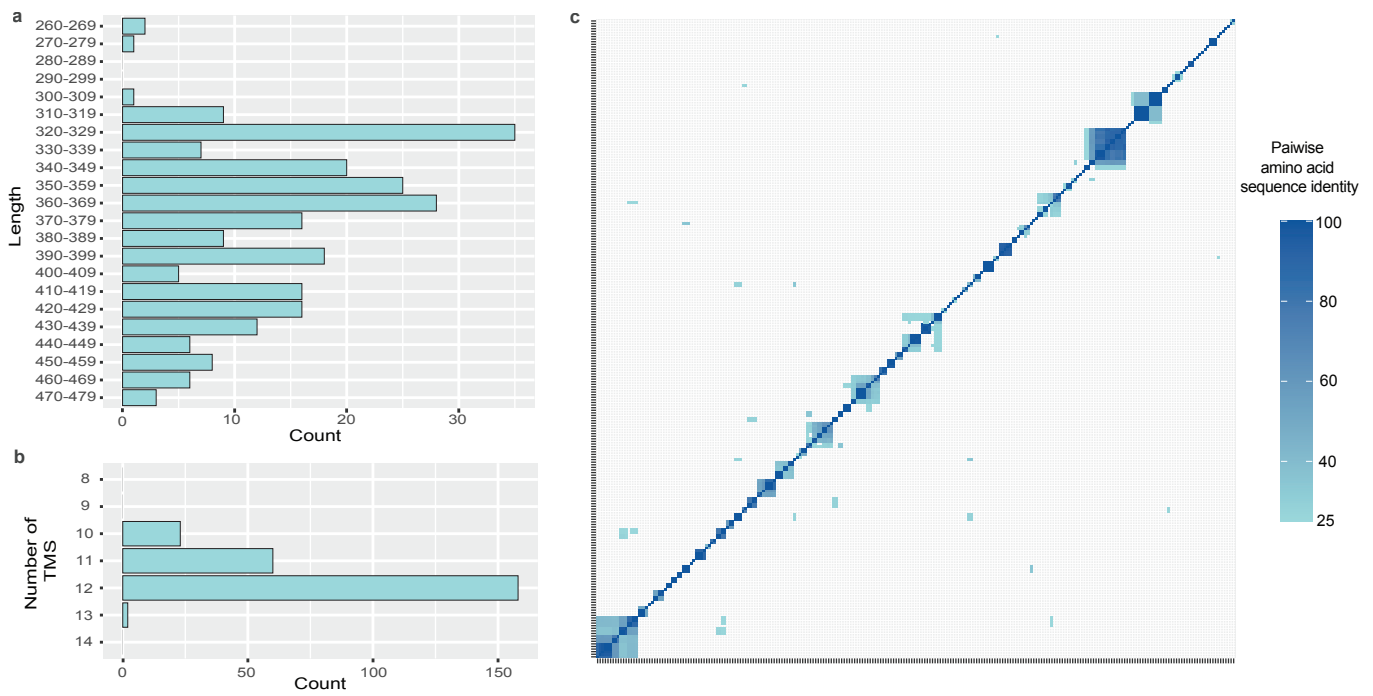

**Supplementary Figure 1. General properties and relationships of Wzy polymerases from *A. baumannii*.** (a) Distribution of proteins across different length ranges. (b) Distribution of proteins by number of predicted transmembrane segments (TMS). (c) All-vs-all pairwise sequence identity matrix visualised as a heatmap. Figure generated using ggplot2 in RStudio v. 3.3.0+.

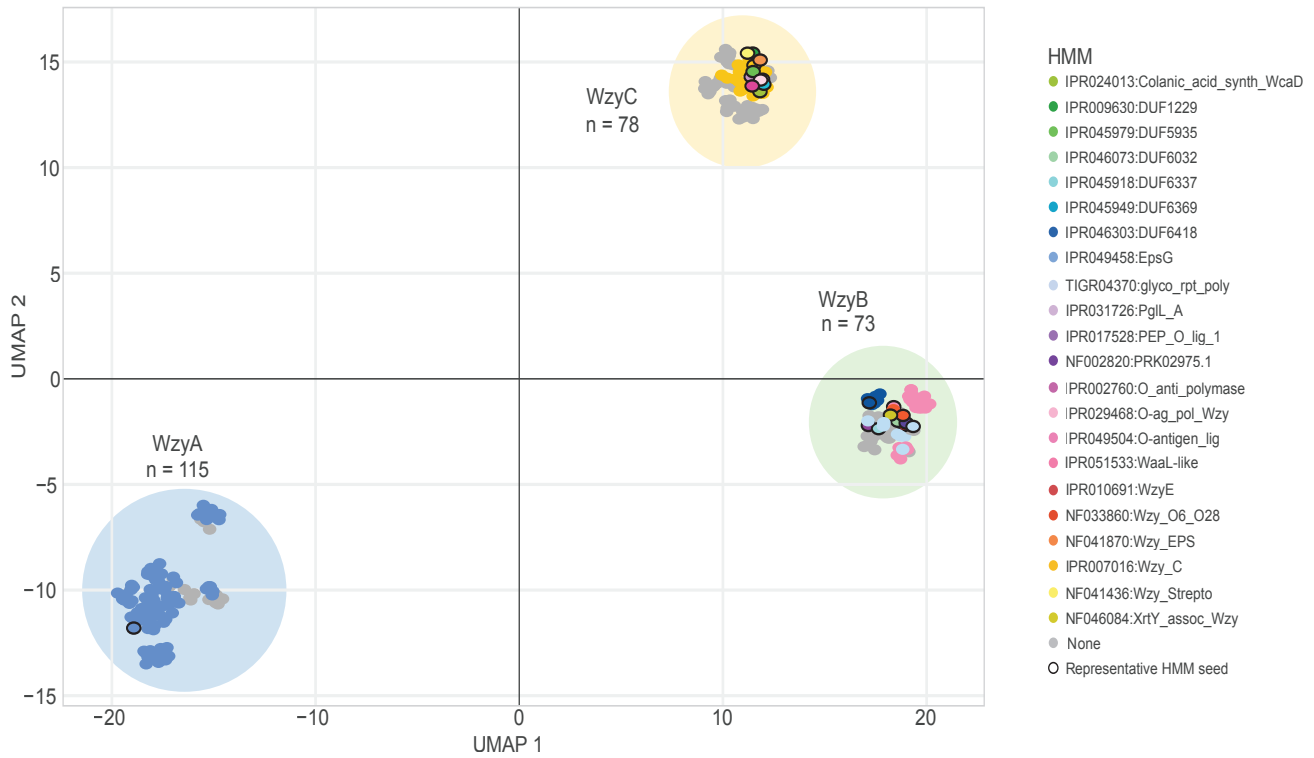

**Supplementary Figure 2. Clustering of representative seed sequences with *A. baumannii* Wzy.** UMAP of Leiden clustering results for *A. baumannii* Wzy and representative seed sequences (bold outline points) from established protein families. Colours of HMM assignments are shown in legend. Circles represent individual proteins.

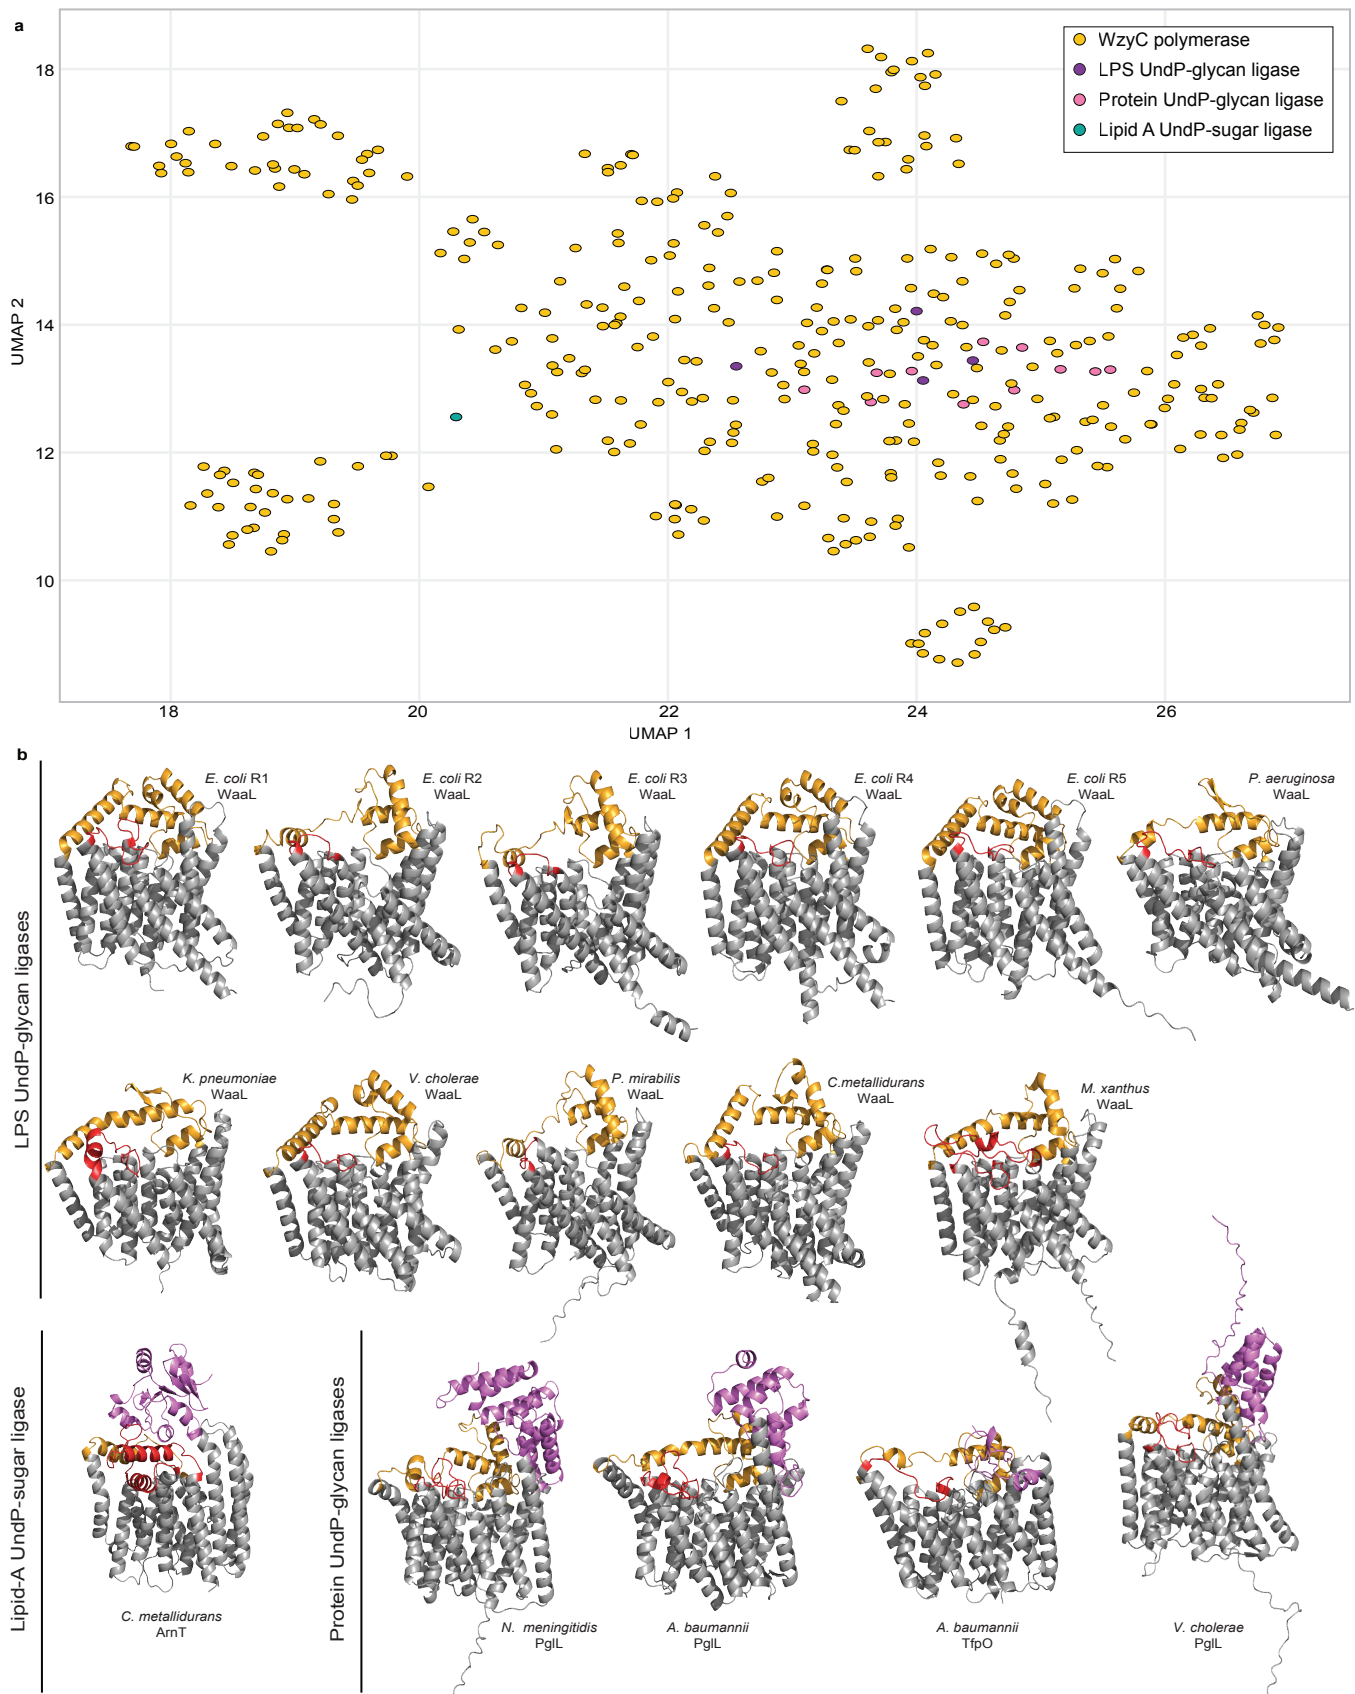

**Supplementary Figure 3. Relationship between WzyC polymerases and UndPP-glycan ligases.**  
**(a)** UMAP projection based on Leiden clustering with key identifying protein types shown top right. **(b)** Visualisation of UndPP-glycan ligase structures showing PL1 (red), PL2 (orange) and PL3 (purple). ArnT does not hit the IPR007016 HMM but is structurally similar to WzyC proteins.

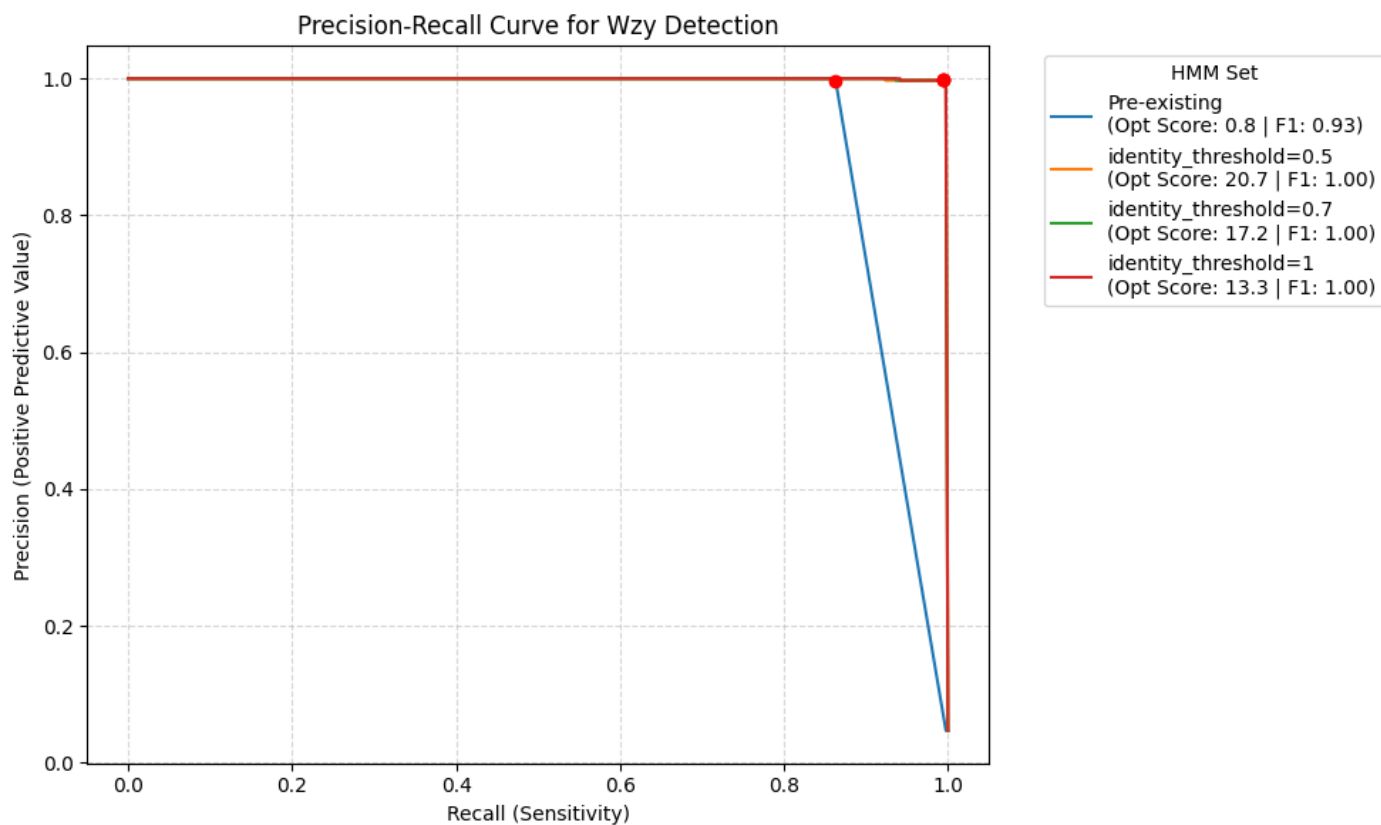

**Supplementary Figure 4. Precision recall curves for Wzy detection using generated HMM profiles.** HMM profiles (no trimming) were screened against sequences for 8431 CPS biosynthesis proteins extracted from *A. baumannii* and *K. pneumoniae* Kaptive databases. Curves were used to calculate optimal bitscore thresholds for each HMM profile as indicated in the key on the right.

## SUPPLEMENTARY REFERENCES

1. Russo, T. et al. The K1 capsular polysaccharide from *Acinetobacter baumannii* is a potential therapeutic target via passive immunization. *Infect. Immun.* 81, 915-922 (2013).
2. Fregolino, E. et al. Identification and structural determination of the capsular polysaccharides from two *Acinetobacter baumannii* clinical isolates, MG1 and SMAL. *Carbohydr Res* 346, 973-977 (2011).
3. Vinogradov, E. et al. Capsular Polysaccharide of *Acinetobacter baumannii* MRSN 31196 (a KL1 Variant Strain) and its Degradation by a Recombinant Depolymerase from Bacteriophage vB\_AbaP\_B5. *Carbohydr Res* 556, 109621 (2025).
4. Senchenkova, S. et al. Structure of the capsular polysaccharide of *Acinetobacter baumannii* ACICU containing di-N-acetylpsseudaminic acid. *Carbohydr Res* 391, 89-92 (2014).
5. Kenyon, J., Marzaioli, A., Hall, R. & De Castro, C. Structure of the K2 capsule associated with the KL2 gene cluster of *Acinetobacter baumannii*. *Glycobiology* 24, 554-563 (2014).
6. Lees-Miller, R.G. et al. A common pathway for O-linked protein-glycosylation and synthesis of capsule in *Acinetobacter baumannii*. *Mol Microbiol* 89, 816-830 (2013).
7. Talyansky, Y. et al. Capsule carbohydrate structure determines virulence in *Acinetobacter baumannii*. *PLoS Pathog* 17, e1009291 (2021).
8. Arbatsky, N. et al. Structure of the neutral capsular polysaccharide of *Acinetobacter baumannii* NIPH146 that carries the KL37 capsule gene cluster. *Carbohydr Res* 413, 12-15 (2015).
9. Timoshina, O.Y. et al. Loss of a branch sugar in the *Acinetobacter baumannii* K3-type capsular polysaccharide due to frameshifts in the *gtr6* glycosyltransferase gene leads to susceptibility to phage APK37.1. *Microbiol Spectr* 11, e0363122 (2023).
10. Kenyon, J., Speciale, I., Hall, R. & De Castro, C. Structure of repeating unit of the capsular polysaccharide from *Acinetobacter baumannii* D78 and assignment of the K4 gene cluster. *Carbohydr Res* 434, 12-17 (2016).
11. Arbatsky, N. et al. The K5 capsular polysaccharide of the bacterium *Acinetobacter baumannii* SDF with the same K unit containing Leg5Ac7Ac as the K7 capsular polysaccharide but a different linkage between the K units. *Russ. Chem. Bull. Int. Ed.* 68, 163-167 (2019).
12. Kenyon, J.J., Marzaioli, A.M., Hall, R.M. and De Castro, C. Structure of the K6 capsular polysaccharide from *Acinetobacter baumannii* isolate RBH4. *Carbohydr Res* 409, 30-35 (2015).
13. Shashkov, A.S. et al. Revised structure of the capsular polysaccharide of *Acinetobacter baumannii* LUH5533 (serogroup O1) containing di-N-acetyllegionaminic acid. *Russ Chem Bull* 64, 1196-1199 (2015).
14. Arbatsky, N. et al. K units of the K8 and K54 capsular polysaccharides produced by *Acinetobacter baumannii* BAL 097 and RCH52 have the same structure but contain different di-N-acyl derivatives of legionaminic acid and are linked differently. *Carbohydr. Res.* 483, 107745 (2019).
15. Kasimova, A.A. et al. The *Acinetobacter baumannii* K70 and K9 capsular polysaccharides consist of related K-units linked by the same Wzy polymerase and cleaved by the same phage depolymerases. *Microbiol Spectr* 11, e03025-03023 (2023).
16. Kenyon, J.J. et al. *Acinetobacter baumannii* K11 and K83 capsular polysaccharides have the same 6-deoxy-l-talose-containing pentasaccharide K units but different linkages between the K units. *Int J Biol Macromol* 103, 648-655 (2017).
17. Kenyon, J., Marzaioli, A., Hall, R. & De Castro, C. Structure of the K12 capsule containing 5,7-di-N-acetylacinetaminic acid from *Acinetobacter baumannii* isolate D36. *Glycobiology* 25, 881-887 (2015).

18. Kenyon, J. et al. *Acinetobacter baumannii* K13 and K73 capsular polysaccharides differ only in K-unit side branches of novel non-2-ulosonic acids: di-N-acetylated forms of either acinetaminic acid or 8-epiacinetaminic acid. *Carbohydr Res* 452, 149-155 (2017).
19. Kenyon, J., Hall, R. & De Castro, C. Structural determination of the K14 capsular polysaccharide from an ST25 *Acinetobacter baumannii* isolate, D46. *Carbohydr Res* 417, 52-56 (2015).
20. Shashkov, A. et al. Structures of the K35 and K15 capsular polysaccharides of *Acinetobacter baumannii* LUH5535 and LUH5554 containing amino and diamino uronic acids. *Carbohydr Res* 448, 28-34 (2017).
21. Kenyon, J.J. et al. Production of the K16 capsular polysaccharide by *Acinetobacter baumannii* ST25 isolate D4 involves a novel glycosyltransferase encoded in the KL16 gene cluster. *Int J Biol Macromol* 128, 101-106 (2019).
22. Kenyon, J. et al. K17 capsular polysaccharide produced by *Acinetobacter baumannii* isolate G7 contains an amide of 2-acetamido-2-deoxy-D-galacturonic acid with D-alanine. *Int J Biol Macromol* 144, 857-862 (2019).
23. Kenyon, J.J. et al. K19 capsular polysaccharide of *Acinetobacter baumannii* is produced via a Wzy polymerase encoded in a small genomic island rather than the KL19 capsule gene cluster. *Microbiol* 162, 1479-1489 (2016).
24. Kasimova, A. et al. *Acinetobacter baumannii* K20 and K21 capsular polysaccharide structures establish roles for UDP-glucose dehydrogenase Ugd2, pyruvyl transferase Ptr2 and two glycosyltransferases. *Glycobiology* 28, 876-884 (2018).
25. Kenyon, J. et al. The KL24 gene cluster and a genomic island encoding a Wzy polymerase contribute genes needed for synthesis of the K24 capsular polysaccharide by the multiply antibiotic resistant *Acinetobacter baumannii* isolate RCH51. *Microbiol* 163, 355-363 (2017).
26. Senchenkova, S. et al. Structure elucidation of the capsular polysaccharide of *Acinetobacter baumannii* AB5075 having the KL25 capsule biosynthesis locus. *Carbohydr Res* 408, 8-11 (2015).
27. Shashkov, A. et al. *Acinetobacter baumannii* K27 and K44 capsular polysaccharides have the same K unit but different structures due to the presence of distinct wzy genes in otherwise closely related K gene clusters. *Glycobiology* 26, 501-508 (2016).
28. Shashkov, A. et al. Structures of three different neutral polysaccharide of *Acinetobacter baumannii*, NIPH190, NIPH201, and NIPH615, assigned to K30, K45, and K48 capsule types, respectively, based on capsule biosynthesis gene clusters. *Carbohydr Res* 417, 81-88 (2015).
29. Cahill, S.M. et al. Elucidation of the K32 capsular polysaccharide structure and characterization of the KL32 gene cluster of *Acinetobacter baumannii* LUH5549. *Biochem (Mosc)* 85, 241-247 (2020).
30. Arbatsky, N. et al. Structure of the N-acetylpsseudaminic acid-containing capsular polysaccharide of *Acinetobacter baumannii* NIPH67. *Russ Chem Bull* 65, 588-591 (2016).
31. Shashkov, A. et al. *Acinetobacter baumannii* K116 capsular polysaccharide structure is a hybrid of the K14 and revised K37 structures. *Carbohydr. Res.* 484, 107774 (2019).
32. Senchenkova, S.N. et al. Structure of a new pseudaminic acid-containing capsular polysaccharide of *Acinetobacter baumannii* LUH5550 having the KL42 capsule biosynthesis locus. *Carbohydr Res* 407, 154-157 (2015).
33. Shashkov, A. et al. Related structures of neutral capsular polysaccharides of *Acinetobacter baumannii* isolates that carry related capsule gene clusters KL43, KL47, and KL88. *Carbohydr Res* 435, 173-179 (2016).
34. Kenyon, J.J. et al. The K46 and K5 capsular polysaccharides produced by *Acinetobacter baumannii* NIPH 329 and SDF have related structures and the side-chain non-ulosonic acids are 4-O-acetylated by phage-encoded O-acetyltransferases. *PLoS One* 14, e0218461 (2019).

35. Vinogradov, E., MacLean, L., Xu, H.H. & Chen, W. The structure of the polysaccharide isolated from *Acinetobacter baumannii* strain LAC-4. *Carbohydr Res* 390, 42-45 (2014).
36. Kasimova, A.A. et al. Structure of the K49 capsular polysaccharide produced by the *Acinetobacter baumannii* ST10 carriage isolate, NL6. *Carbohydr Res* 557, 109646 (2025).
37. Haseley, S. & Wilkinson, S. Structure of the O18 antigen from *Acinetobacter baumannii*. *Carbohydr Res* 301, 187-192 (1997).
38. Shashkov, A. et al. Genetics of biosynthesis and structure of the K53 capsular polysaccharide of *Acinetobacter baumannii* D23 made up of a disaccharide K unit. *Microbiol* 164, 1289-1292 (2018).
39. Kenyon, J.J. et al. Involvement of a multifunctional rhamnosyltransferase in the synthesis of three related *Acinetobacter baumannii* capsular polysaccharides, K55, K74 and K85. *Int J Biol Macromol* 166, 1230-1237 (2021).
40. Kenyon, J., Kasimova, A., Shashkov, A., Hall, R. & Knirel, Y. *Acinetobacter baumannii* isolate BAL\_212 from Vietnam produces the K57 capsular polysaccharide containing a rarely occurring amino sugar N-acetylvirosamine. *Microbiol* 164, 217-220 (2018).
41. Iovine, A. et al. Structure of the K58 capsular polysaccharide produced by *Acinetobacter baumannii* isolate MRSN 31468 includes Pse5Ac7Ac that is 4-O-acetylated by a phage-encoded acetyltransferase. *Carbohydr Res* 547, 109324 (2025).
42. Zou, W. et al. Capsular polysaccharide structure of *Acinetobacter baumannii* K58 from clinical isolate MRSN31468. *Carbohydr Res* 546, 109307 (2024).
43. Shashkov, A.S. et al. Characterization of the carbapenem-resistant *Acinetobacter baumannii* clinical reference isolate BAL062 (CC2: KL58: OCL1): resistance properties and capsular polysaccharide structure. *mSystems* 9, e00941-00924 (2024).
44. Arbatsky, N.P. et al. Carbapenem-resistant *Acinetobacter baumannii* isolate BAL114 from Vietnam produces capsular polysaccharide with two forms of the K58 unit. *Carbohydr Res* 556, 109592 (2025).
45. Arbatsky, N. et al. Revised structure of the polysaccharide from *Acinetobacter baumannii* LUH5551 assigned as the K63 type capsular polysaccharide. *Carbohydr Res* 535, 109020 (2024).
46. Shpirt, A.M. et al. *Acinetobacter baumannii* nasal carriage isolate recovered from an asymptomatic patient in Vietnam is extensively antibiotic resistant and produces a rare K71 type capsule. *Microbiol Spectr* 12, e01838-01824 (2024).
47. Haseley, S., Traub, W. & Wilkinson, S. Structures of polymeric products isolated from the lipopolysaccharides of reference strains for *Acinetobacter baumannii* O23 and O12. *Eur. J. Biochem.* 244, 147-154 (1997).
48. Kasimova, A. et al. Structure of the K82 capsular polysaccharide from *Acinetobacter baumannii* LUH5534 containing a D-galactose 4,6-pyruvic acid acetal. *Biochem (Mosc)* 83, 831-835 (2018).
49. Arbatsky, N.P. et al. The K129 capsular polysaccharide produced by *Acinetobacter baumannii* MAR 15–4076 has the same composition as K84 but differs in the linkage between units altering the overall branching topology. *Carbohydr Res* 545, 109273 (2024).
50. Arbatsky, N.P. et al. Structure of the K87 capsular polysaccharide and KL87 gene cluster of *Acinetobacter baumannii* LUH5547 reveals a heptasaccharide repeating unit. *Carbohydr Res* 509, 108439 (2021).
51. Arbatsky, N.P. et al. The K89 capsular polysaccharide produced by *Acinetobacter baumannii* LUH5552 consists of a pentameric repeat-unit that includes a 3 acetamido-3,6-dideoxy-D-galactose residue. *Int J Biol Macromol* 217, 515–521 (2022).
52. Senchenkova, S.N. et al. The K90 capsular polysaccharide produced by *Acinetobacter baumannii* LUH5553 contains di-N-acetylpsseudaminic acid and is structurally related to the K7 polysaccharide from *A. baumannii* LUH5533. *Carbohydr. Res.* 479, 1-5 (2019).

53. Senchenkova, S.N. et al. A novel ItrA4 d-galactosyl 1-phosphate transferase is predicted to initiate synthesis of an amino sugar-lacking K92 capsular polysaccharide of *Acinetobacter baumannii* B8300. *Res Microbiol* 172, 103815 (2021).
54. Kasimova, A. et al. Structure and gene cluster of the K93 capsular polysaccharide of *Acinetobacter baumannii* B11911 containing 5-N-Acetyl-7-N-[(R)-3-hydroxybutanoyl]pseudaminic acid. *Biochem (Mosc)* 82, 483-489 (2017).
55. Arbatsky, N.P. et al. The K95 capsular polysaccharide produced by *Acinetobacter baumannii* isolate MAR18-2212 includes a rarely encountered 3-acetamido-3, 6-dideoxy-D-glucose (D-Qui3NAc) sugar. *Carbohydr Res* 553, 109499 (2025).
56. Shpirt, A.M. et al. Structure and gene cluster of the capsular polysaccharide of *Acinetobacter baumannii* K104. *Carbohydr Res* 109745 (2025).
57. Filatov, A.V. et al. Structure and gene cluster of the capsular polysaccharide produced by *Acinetobacter baumannii* K11. *Carbohydr Res* 109760 (2025).
58. Arbatsky, N.P. et al. Involvement of a phage-encoded Wzy protein in the polymerization of K127 units to form the capsular polysaccharide of *Acinetobacter baumannii* isolate 36-1454. *Microbiol Spectr* 27, e0150321 (2022).
59. Arbatsky, N. et al. Structure of the K128 capsular polysaccharide produced by *Acinetobacter baumannii* KZ-1093 from Kazakhstan. *Carbohydr. Res.* (2019).
60. Shashkov, A.S. et al. Complete chemical structure of the K135 capsular polysaccharide produced by *Acinetobacter baumannii* RES-546 that contains 5,7-di-N-acetyl-8-epipseudaminic acid. *Carbohydr Res* 523, 108726 (2023).
61. Kasimova, A.A. et al. Structure of the K141 capsular polysaccharide produced by *Acinetobacter baumannii* isolate KZ1106 that carries KL141 at the chromosomal K locus. *Carbohydr Res* 538, 109097 (2024).
62. Kasimova, A. et al. The K218 capsular polysaccharide produced by *Acinetobacter baumannii* isolate 52-249 includes 5, 7-di-N-acetyl-pseudaminic acid linked by a KpsS3 glycosyltransferase. *Intl J Biol Macromol* 218, 310-316 (2022).
63. Kasimova, A.A. et al. The *Acinetobacter baumannii* K239 capsular polysaccharide includes heptasaccharide units that are structurally related to K86 but joined by different linkages formed by different wzy polymerases. *Int J Biol Macromol* 262, 130045 (2024).
